# Supplementary material for: Palladium-catalyzed asymmetric coupling cyclization of terminal γ-allenols with aryl iodides
Source: Royal Society of Chemistry journal article supplement (doi:10.1039/c3cc40892b), 2013-01-01
Supplement: c3cc40892b.pdf [file c3cc40892b.pdf]

## Supporting Information

### **Palladium-catalyzed asymmetric coupling cyclization of terminal $\gamma$ -allenols with aryl iodides**

Xi Xie <sup>a</sup> and Shengming Ma <sup>\*a,b</sup>

<sup>a</sup> Shanghai Key Laboratory of Green Chemistry and Chemical Process, Department of Chemistry, East China Normal University, 3663 North Zhongshan Lu, Shanghai 200062.

<sup>b</sup> State Key Laboratory of Organometallic Chemistry, Shanghai Institute of Organic Chemistry, Chinese Academy of Sciences, 345 Linglin Lu, Shanghai 200032, P. R. China.

Fax: +86 21 6260 9305

E-mail: [masm@sioc.ac.cn](mailto:masm@sioc.ac.cn)

|                                                              |         |
|--------------------------------------------------------------|---------|
| General information                                          | S2      |
| Experimental details and analytical data                     | S2-S15  |
| <sup>1</sup> H, <sup>13</sup> C and HPLC spectra of products | S16-S75 |

**General Information.** All reactions were carried out in oven dried Schlenk tubes. Pd(dba)<sub>2</sub> was purchased from Aladdin; (*R,R*)-DACH Phenyl Trost Ligand **L1** (98%) was purchased from Stream Chemicals and kept in glove box; (*S*)-tetrahydrofuran-2-carboxylic acid (97%) was purchased from Accela; K<sub>3</sub>PO<sub>4</sub> was purchased from Acros and kept in glove box; 3 Å molecular sieves were purchased from Alfa Aesar and kept in glove box after activation (activated at 450 °C for 10 h in Muffle furnace; after cooling to 200 °C, transferred to the glove box to allow to cool to room temperature for use). CH<sub>3</sub>CN, (CH<sub>3</sub>)<sub>3</sub>CCN, Et<sub>3</sub>N, DMF and CH<sub>3</sub>(CH<sub>2</sub>)<sub>3</sub>CN were dried over CaH<sub>2</sub> and distilled freshly before use. 1,4-Dioxane and toluene were dried over sodium wire and distilled freshly before use. Other reagents were used without further treatment. All the temperatures are referred to the oil baths used.

## Experimental details and analytical data

### 1. Preparation of (*R*)-2-(1-phenylvinyl)tetrahydrofuran **2a** (xx-5-141)

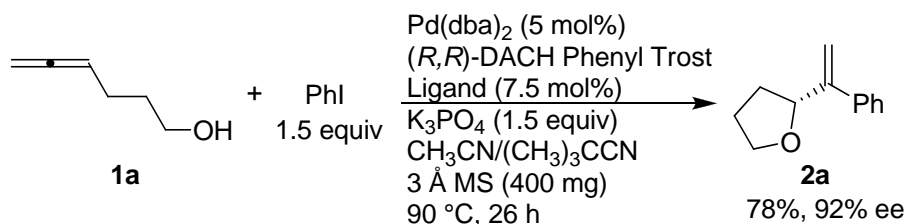

**Typical procedure I:** To a dry Schlenk tube were added 4,5-hexadien-1-ol **1a** (98.2 mg, 1 mmol), freshly distilled CH<sub>3</sub>CN (6 mL), and (CH<sub>3</sub>)<sub>3</sub>CCN (4 mL). The solution was frozen with a liquid nitrogen bath, degassed for ten minutes and then thawed under argon. This cycle was repeated for three times. To another dry Schlenk tube were sequentially added K<sub>3</sub>PO<sub>4</sub> (318.3 mg, 1.5 mmol), 3 Å molecular sieve (400 mg), Pd(dba)<sub>2</sub> (28.7 mg, 0.05 mmol), and (*R,R*)-DACH Phenyl Trost Ligand (51.9 mg, 0.075 mmol) in a glove box. This Schlenk tube was then taken out to the bench, which was followed by the addition of the above-mentioned degassed solution. The resulting mixture was then stirred at room temperature for 13 min, then frozen with a liquid nitrogen bath and iodobenzene (170 μL, d = 1.81 g/cm<sup>3</sup>, 305.9 mg, 1.5 mmol) was added under argon. After repeating evacuating and refilling with argon for three times, the resulting mixture was stirred at 90 °C under the argon atmosphere with an

argon balloon. When the reaction was complete as monitored by TLC, it was filtered and washed with ethyl ether. The solvent was evaporated under vacuum, and the residue was purified by chromatography on silica gel (eluent: petroleum ether:ethyl ether = 20:1) to afford (*R*)-**2a** (136.0 mg, 78%) as an oil; 92% ee determined by HPLC analysis (AD-H column, rate = 0.8 mL/min, eluent: hexane/*i*-PrOH = 95:5,  $\lambda$  = 230 nm,  $t_R$ (minor) = 5.3 min,  $t_R$ (major) = 6.6 min);  $[\alpha]_D^{20}$  = -8.9 ( $c$  = 2.62, ethyl acetate);  $^1\text{H}$  NMR (300 MHz,  $\text{CDCl}_3$ )  $\delta$  7.50-7.22 (m, 5 H, Ar-H), 5.37 (s, 1 H, one proton from  $\text{H}_2\text{C}=\text{C}$ ), 5.30 (s, 1 H, one proton from  $\text{H}_2\text{C}=\text{C}$ ), 4.87 (t,  $J$  = 6.9 Hz, 1 H, CHO), 4.10-3.97 (m, 1 H, one proton from  $\text{OCH}_2$ ), 3.95-3.82 (m, 1 H, one proton from  $\text{OCH}_2$ ), 2.18-2.01 (m, 1 H, one proton from  $\text{CH}_2\text{CH}_2$ ), 1.98-1.82 (m, 2 H, two protons from  $\text{CH}_2\text{CH}_2$ ), 1.71-1.55 (m, 1 H, one proton from  $\text{CH}_2\text{CH}_2$ );  $^{13}\text{C}$  NMR (75.4 MHz,  $\text{CDCl}_3$ )  $\delta$  149.6, 139.9, 128.2, 127.4, 126.7, 111.6, 80.0, 68.4, 31.7, 25.5; IR (neat,  $\text{cm}^{-1}$ ): 2975, 2867, 1631, 1494, 1443, 1060; MS (70 ev, EI)  $m/z$  (%): 174 ( $\text{M}^+$ , 100.00); HRMS Calcd for  $\text{C}_{12}\text{H}_{14}\text{O}$  ( $\text{M}^+$ ): 174.1045, Found: 174.1044.

The absolute configuration of the product **2a** was determined to be *R* by comparison of the  $t_R$  of the authentic (*S*)-**2a**, which was in situ prepared by the Wittig methylation of (*S*)-phenyl(tetrahydrofuran-2-yl)methanone<sup>1</sup> derived from the reaction between (*S*)-tetrahydrofuran-2-carboxylic acid and phenylmagnesium bromide.<sup>2</sup>

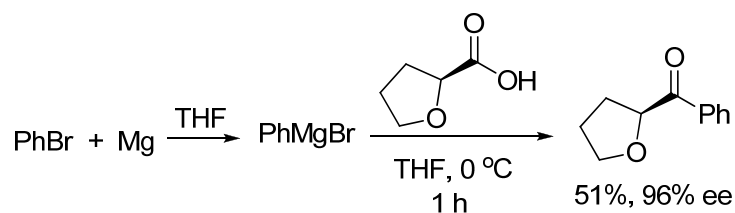

To a 100 mL 3-necked flask equipped with a condenser and an addition funnel were added magnesium turnings (1.0208 g, 42 mmol) and anhydrous THF (40 mL) under  $\text{N}_2$ . A solution of bromobenzene (5.4951 g, 35 mmol) in anhydrous THF (10 mL) was added through the addition funnel. The Grignard reaction was initiated with the addition of approximately 5 mL of the bromobenzene solution and a few crystal of iodine. The remaining bromobenzene solution was then added and the reaction was heated under reflux for 1 hour. Then it was cooled to 0 °C and a solution of (*S*)-tetrahydrofuran-2-carboxylic acid (1.1610 g, 10 mmol) in anhydrous THF (12.5

mL) was added in one portion with stirring. After 30 minutes at 0 °C, the reaction was warmed up to room temperature and quenched with aqueous hydrochloric acid (1 N, 10 mL). The organic layer was separated from the aqueous layer, which was extracted with ethyl ether (3 × 20 mL). The organic layer was washed with brine and dried over anhydrous magnesium sulfate. Filtration, evaporation and column chromatography on silica gel (eluent: petroleum ether/ethyl ether = 5/1 to 3/1) afforded (*S*)-phenyl(tetrahydrofuran-2-yl)methanone (910.2 mg, 51%, 96% ee) (HPLC conditions: As-H column, rate = 0.7 mL/min, eluent: hexane/*i*-PrOH = 70:30,  $\lambda$  = 214 nm,  $t_R$ (major) = 7.2 min,  $t_R$ (minor) = 14.8 min); liquid;  $[\alpha]_D^{20}$  = +1.4 ( $c$  = 1.07, CHCl<sub>3</sub>); <sup>1</sup>H NMR (300 MHz, CDCl<sub>3</sub>)  $\delta$  8.04-7.90 (m, 2 H, Ar-H), 7.58-7.36 (m, 3 H, Ar-H), 5.29-5.16 (m, 1 H, OCH), 4.04-3.86 (m, 2 H, OCH<sub>2</sub>), 2.33-2.17 (m, 1 H, one proton from CH<sub>2</sub>CH<sub>2</sub>), 2.14-2.00 (m, 1 H, one proton from CH<sub>2</sub>CH<sub>2</sub>), 1.99-1.84 (m, 2 H, two protons from CH<sub>2</sub>CH<sub>2</sub>); <sup>13</sup>C NMR (75.4 MHz, CDCl<sub>3</sub>)  $\delta$  198.5, 134.8, 133.1, 128.5, 128.4, 79.8, 69.2, 29.1, 25.4; IR (neat, cm<sup>-1</sup>): 2976, 2952, 2873, 1689, 1597, 1580, 1449, 1226, 1178, 1100, 1058, 1003; MS (70 ev, EI)  $m/z$  (%): 176 (M<sup>+</sup>, 0.50), 71 (100); Anal. Calcd for C<sub>11</sub>H<sub>12</sub>O<sub>2</sub>: C, 74.98; H, 6.86. Found: C, 74.81; H, 6.91.

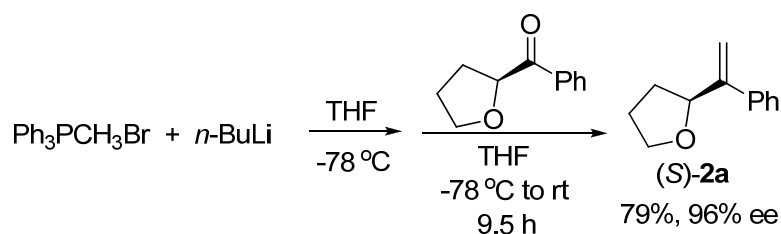

To a slurry of (C<sub>6</sub>H<sub>5</sub>)<sub>3</sub>PCH<sub>3</sub>Br (625.9 mg, 1.8 mmol) in THF (8 mL) cooled to -78 °C was added *n*-C<sub>4</sub>H<sub>9</sub>Li (2.5 M in hexane, 0.72 mL, 1.8 mmol). The resulting mixture was stirred at this temperature for 10 min. To this bright yellow solution was added a solution of (*S*)-phenyl(tetrahydrofuran-2-yl)methanone (308.8 mg, 1.8 mmol) in THF (8 mL). After being stirred at room temperature for 9.5 h, the solution was quenched with an aqueous solution of hydrochloric acid (1 N, 10 mL). The organic layer was separated and the aqueous layer was extracted with ethyl ether (3 × 10 mL). The combined organic layer was washed with brine and dried over anhydrous magnesium sulfate. Filtration, evaporation and column chromatography on silica gel (eluent: petroleum ether/ethyl ether = 10/1) afforded (*S*)-**2a** (242.3 mg, 79%, 96% ee)

(HPLC conditions: AD-H column, rate = 0.8 mL/min, eluent: hexane/*i*-PrOH = 95:5,  $\lambda = 230$  nm,  $t_{\text{R}}(\text{major}) = 5.5$  min,  $t_{\text{R}}(\text{minor}) = 6.8$  min); liquid;  $[\alpha]_{\text{D}}^{20} = +8.5$  ( $c = 2.52$ , ethyl acetate);  $^1\text{H}$  NMR (300 MHz,  $\text{CDCl}_3$ )  $\delta$  7.48-7.20 (m, 5 H, Ar-H), 5.36 (dd,  $J = 1.5, 1.2$  Hz, one proton from  $\text{H}_2\text{C}=\text{C}$ ), 5.29 (s, 1 H, one proton from  $\text{H}_2\text{C}=\text{C}$ ), 4.85 (t,  $J = 6.9$  Hz, 1 H, CHO), 4.01 (dt,  $J = 8.1, 6.6$  Hz, 1 H, one proton from  $\text{OCH}_2$ ), 3.87 (dt,  $J = 8.1, 6.9$  Hz, 1 H, one proton from  $\text{OCH}_2$ ), 2.13-1.98 (m, 1 H, one proton from  $\text{CH}_2\text{CH}_2$ ), 1.98-1.83 (m, 2 H, two protons from  $\text{CH}_2\text{CH}_2$ ), 1.70-1.55 (m, 1 H, one proton from  $\text{CH}_2\text{CH}_2$ );  $^{13}\text{C}$  NMR (75.4 MHz,  $\text{CDCl}_3$ )  $\delta$  149.5, 139.8, 128.2, 127.4, 126.6, 111.5, 79.9, 68.3, 31.6, 25.5; IR (neat,  $\text{cm}^{-1}$ ): 2987, 2850, 2867, 1715, 1495, 1445, 1080, 1061, 1028; MS (70 eV, EI)  $m/z$  (%): 174 ( $\text{M}^+$ , 66.49), 71 (100); HRMS Calcd for  $\text{C}_{12}\text{H}_{14}\text{O}$  ( $\text{M}^+$ ): 174.1045, Found: 174.1044.

The following compounds **2b-2l** in Table 2 and Table 3 were prepared according to **Typical Procedure I**.

All the racemic products were also prepared according to this procedure in the absence of the chiral ligand and replacing  $\text{Pd}(\text{dba})_2$  with  $\text{Pd}(\text{PPh}_3)_4$  in  $\text{CH}_3\text{CN}$ .

## 2. Preparation of (*R*)-2-(1-(4-methoxyphenyl)viny)tetrahydrofuran **2b** (xx-6-20)

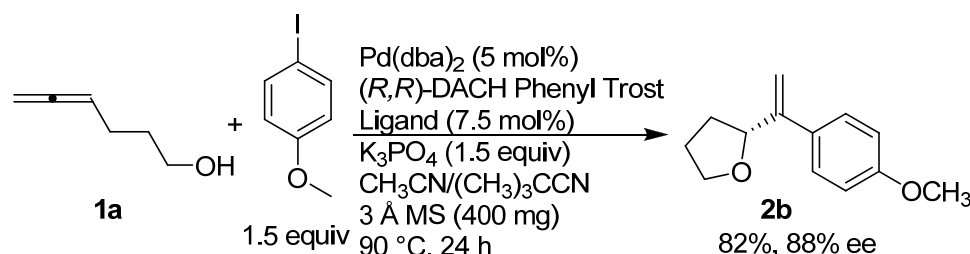

The reaction of **1a** (98.1 mg, 1.0 mmol),  $\text{CH}_3\text{CN}$  (4.8 mL),  $(\text{CH}_3)_3\text{CCN}$  (3.2 mL),  $\text{K}_3\text{PO}_4$  (318.4 mg, 1.5 mmol), 3 Å molecular sieve (400 mg),  $\text{Pd}(\text{dba})_2$  (28.7 mg, 0.050 mmol), *(R,R)*-DACH Phenyl Trost Ligand (51.8 mg, 0.075 mmol), and 1-iodo-4-methoxybenzene (351.1 mg, 1.5 mmol) afforded (*R*)-**2b** (167.9 mg, 82%, 88% ee) (eluent: petroleum ether/ethyl ether = 20/1 to 10/1) (HPLC conditions: AD-H column, rate = 0.5 mL/min, eluent: hexane/*i*-PrOH = 95:5,  $\lambda = 230$  nm,  $t_{\text{R}}(\text{minor}) = 12.2$  min,  $t_{\text{R}}(\text{major}) = 13.9$  min); liquid;  $^1\text{H}$  NMR (300 MHz,  $\text{CDCl}_3$ )  $\delta$  7.38-7.28 (m, 2 H, Ar-H), 6.90-6.82 (m, 2 H, Ar-H), 5.29 (dd,  $J = 1.8, 1.5$  Hz, 1 H, one proton from

H<sub>2</sub>C=C), 5.24-5.22 (m, 1 H, one proton from H<sub>2</sub>C=C), 4.83 (t, *J* = 6.9 Hz, 1 H, OCH), 4.02 (dt, *J* = 8.4, 6.6 Hz, 1 H, one proton from OCH<sub>2</sub>), 3.88 (dt, *J* = 8.1, 7.0 Hz, 1 H, one proton from OCH<sub>2</sub>), 3.81 (s, 3 H, CH<sub>3</sub>), 2.15-2.02 (m, 1 H, one proton from CH<sub>2</sub>CH<sub>2</sub>), 1.96-1.85 (m, 2 H, two protons from CH<sub>2</sub>CH<sub>2</sub>), 1.71-1.57 (m, 1 H, one proton from CH<sub>2</sub>CH<sub>2</sub>); <sup>13</sup>C NMR (75.4 MHz, CDCl<sub>3</sub>) δ 159.0, 148.7, 132.2, 127.7, 113.5, 110.1, 80.0, 68.4, 55.1, 31.6, 25.5; IR (neat, cm<sup>-1</sup>): 2973, 2869, 1608, 1510, 1461, 1245, 1179, 1106, 1061, 1032; MS (70 ev, EI) *m/z* (%): 204 (M<sup>+</sup>, 36.16), 133 (100); HRMS Calcd for C<sub>13</sub>H<sub>16</sub>O<sub>2</sub> (M<sup>+</sup>): 204.1150, Found: 204.1151.

### 3. Preparation of (*R*)-2-(1-(3,5-dimethylphenyl)vinyl)tetrahydrofuran **2c** (xx-6-96)

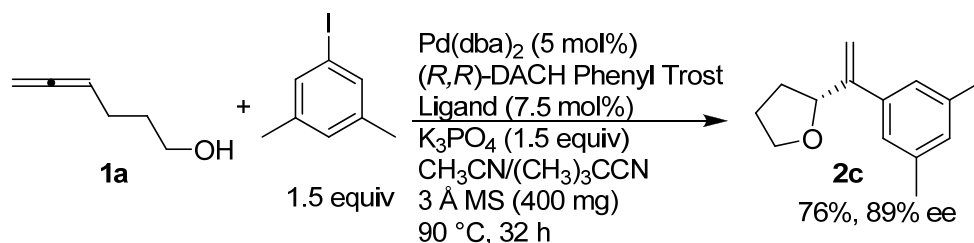

The reaction of **1a** (98.0 mg, 1.0 mmol), CH<sub>3</sub>CN (4.8 mL), (CH<sub>3</sub>)<sub>3</sub>CCN (3.2 mL), K<sub>3</sub>PO<sub>4</sub> (318.3 mg, 1.5 mmol), 3 Å molecular sieve (400.1 mg), Pd(dba)<sub>2</sub> (28.8 mg, 0.050 mmol), (*R,R*)-DACH Phenyl Trost Ligand (51.9 mg, 0.075 mmol), and 1-iodo-3,5-dimethylbenzene (217 μL, *d* = 1.608 g/cm<sup>3</sup>, 348.9 mg, 1.5 mmol) afforded (*R*)-**2c** (153.0 mg, 76%, 89% ee) (eluent: petroleum ether/ethyl ether = 30/1) (HPLC conditions: AD-H column, rate = 0.5 mL/min, eluent: hexane/*i*-PrOH = 95:5, λ = 230 nm, *t*<sub>R</sub>(minor) = 7.5 min, *t*<sub>R</sub>(major) = 9.0 min); liquid; <sup>1</sup>H NMR (300 MHz, CDCl<sub>3</sub>) δ 6.99 (s, 2 H, Ar-H), 6.93 (s, 1 H, Ar-H), 5.32 (dd, *J* = 1.8, 1.5 Hz, 1 H, one proton from H<sub>2</sub>C=), 5.26 (s, 1 H, one proton from H<sub>2</sub>C=), 4.85 (t, *J* = 7.1 Hz, 1 H, OCH), 4.03 (dt, *J* = 8.1, 6.8 Hz, 1 H, one proton from OCH<sub>2</sub>), 3.88 (dt, *J* = 8.1, 7.1 Hz, 1 H, one proton from OCH<sub>2</sub>), 2.32 (s, 6 H, 2×CH<sub>3</sub>), 2.15-2.02 (m, 1 H, one proton from CH<sub>2</sub>CH<sub>2</sub>), 1.97-1.85 (m, 2 H, two protons from CH<sub>2</sub>CH<sub>2</sub>), 1.71-1.57 (m, 1 H, one proton from CH<sub>2</sub>CH<sub>2</sub>); <sup>13</sup>C NMR (75.4 MHz, CDCl<sub>3</sub>) δ 149.8, 139.9, 137.5, 129.0, 124.5, 111.0, 80.0, 68.3, 31.7, 25.5, 21.3; IR (neat, cm<sup>-1</sup>): 2974, 2948, 2917, 2865, 1598, 1459, 1068; MS (70 ev, EI) *m/z* (%): 202 (M<sup>+</sup>, 76.16), 71 (100); HRMS Calcd

for C<sub>14</sub>H<sub>18</sub>O (M<sup>+</sup>): 202.1358, Found: 202.1359.

#### 4. Preparation of (*R*)-2-(1-(4-*N,N*-diethylaminocarbonylphenyl)vinyl)tetrahydrofuran **2d** (xx-6-43)

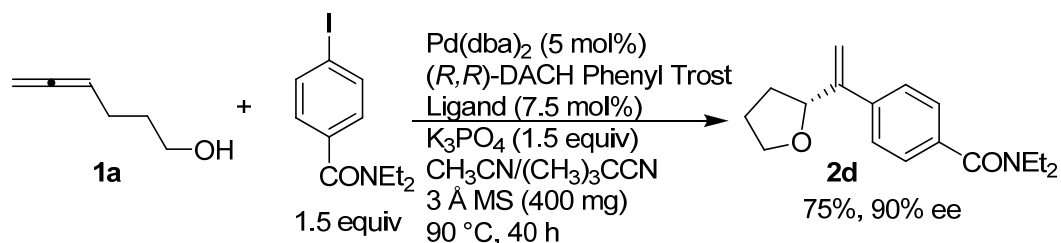

The reaction of **1d** (98.2 mg, 1.0 mmol), CH<sub>3</sub>CN (3.6 mL), (CH<sub>3</sub>)<sub>3</sub>CCN (2.4 mL), K<sub>3</sub>PO<sub>4</sub> (318.5 mg, 1.5 mmol), 3 Å molecular sieve (400 mg), Pd(dba)<sub>2</sub> (28.7 mg, 0.050 mmol), (*R,R*)-DACH Phenyl Trost Ligand (51.8 mg, 0.075 mmol), and *N,N*-diethyl-4-iodobenzamide (454.8 mg, 1.5 mmol) afforded (*R*)-**2d** (205.0 mg, 75%, 90% ee) (eluent: petroleum ether/ethyl acetate = 3/1 to 2/1) (HPLC conditions: OJ-H column, rate = 0.5 mL/min, eluent: hexane/*i*-PrOH = 90:10, λ = 230 nm, *t*<sub>R</sub>(major) = 14.4 min, *t*<sub>R</sub>(minor) = 15.5 min); liquid; <sup>1</sup>H NMR (300 MHz, CDCl<sub>3</sub>) δ 7.43-7.36 (m, 2 H, Ar-H), 7.35-7.27 (m, 2 H, Ar-H), 5.38 (dd, *J* = 1.8, 1.5 Hz, 1 H, one proton from H<sub>2</sub>C=), 5.31 (s, 1 H, one proton from H<sub>2</sub>C=), 4.82 (t, *J* = 7.1 Hz, 1 H, OCH), 4.00 (dt, *J* = 8.1, 6.6 Hz, 1 H, one proton from OCH<sub>2</sub>), 3.86 (dt, *J* = 8.1, 6.9 Hz, 1 H, one proton from OCH<sub>2</sub>), 3.70-3.10 (br, 4 H, 2×CH<sub>2</sub>), 2.14-1.98 (m, 1 H, one proton from CH<sub>2</sub>CH<sub>2</sub>), 1.96-1.80 (m, 2 H, two protons from CH<sub>2</sub>CH<sub>2</sub>), 1.70-1.52 (m, 1 H, one proton from CH<sub>2</sub>CH<sub>2</sub>), 1.40-0.90 (br, 6 H, 2×CH<sub>3</sub>); <sup>13</sup>C NMR (75.4 MHz, CDCl<sub>3</sub>) δ 170.8, 148.6, 140.4, 136.0, 126.5, 126.1, 112.2, 79.7, 68.2, 43.1, 39.0, 31.4, 25.3, 13.9, 12.7; IR (neat, cm<sup>-1</sup>): 2973, 2935, 2874, 1627, 1458, 1426, 1287, 1092, 1059, 1019; MS (70 ev, EI) *m/z* (%): 273 (M<sup>+</sup>, 37.38), 201 (100); HRMS Calcd for C<sub>17</sub>H<sub>23</sub>NO<sub>2</sub> (M<sup>+</sup>): 273.1729, Found: 273.1730.

#### 5. Preparation of (*R*)-2-(1-(3-*N,N*-diethylaminocarbonylphenyl)vinyl)tetrahydrofuran **2e** (xx-6-58)

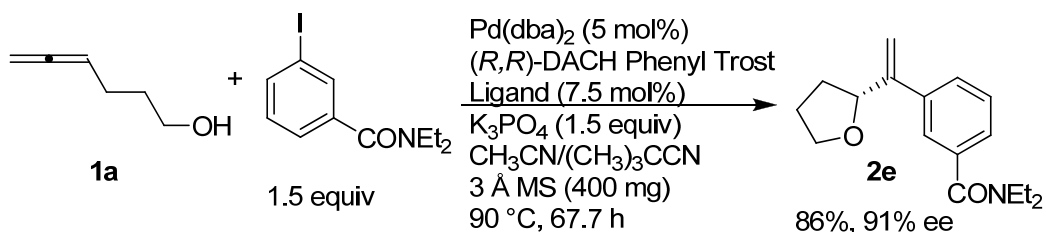

The reaction of **1d** (98.0 mg, 1.0 mmol),  $\text{CH}_3\text{CN}$  (3.6 mL),  $(\text{CH}_3)_3\text{CCN}$  (2.4 mL),  $\text{K}_3\text{PO}_4$  (318.3 mg, 1.5 mmol), 3 Å molecular sieve (400 mg),  $\text{Pd}(\text{dba})_2$  (28.7 mg, 0.050 mmol), *(R,R)*-DACH Phenyl Trost Ligand (51.9 mg, 0.075 mmol), and *N,N*-diethyl-3-iodobenzamide (454.8 mg, 1.5 mmol) afforded (*R*)-**2e** (235.7 mg, 86%, 91% ee) (eluent: petroleum ether/ethyl acetate = 5/1 to 3/1) (HPLC conditions: OD-H column, rate = 1.0 mL/min, eluent: hexane/*i*-PrOH = 95:5,  $\lambda = 214 \text{ nm}$ ,  $t_{\text{R}}(\text{major}) = 24.2 \text{ min}$ ,  $t_{\text{R}}(\text{minor}) = 25.9 \text{ min}$ ); liquid;  $^1\text{H NMR}$  (300 MHz,  $\text{CDCl}_3$ )  $\delta$  7.45-7.25 (m, 4 H, Ar-H), 5.40 (s, 1 H, one proton from  $\text{H}_2\text{C}=\text{}$ ), 5.32 (s, 1 H, one proton from  $\text{H}_2\text{C}=\text{}$ ), 4.83 (t,  $J = 6.9 \text{ Hz}$ , 1 H, OCH), 4.05-3.94 (m, 1 H, one proton from  $\text{OCH}_2$ ), 3.94-3.82 (m, 1 H, one proton from  $\text{OCH}_2$ ), 3.70-3.10 (br, 4 H,  $2 \times \text{CH}_2$ ), 2.15-2.00 (m, 1 H, one proton from  $\text{CH}_2\text{CH}_2$ ), 1.98-1.80 (m, 2 H, two protons from  $\text{CH}_2\text{CH}_2$ ), 1.70-1.56 (m, 1 H, one proton from  $\text{CH}_2\text{CH}_2$ ), 1.40-0.96 (br, 6 H,  $2 \times \text{CH}_3$ );  $^{13}\text{C NMR}$  (75.4 MHz,  $\text{CDCl}_3$ )  $\delta$  171.0, 148.8, 139.9, 137.1, 128.2, 127.3, 125.2, 124.5, 112.3, 79.8, 68.3, 43.2, 39.1, 31.5, 25.4, 14.1, 12.8; IR (neat,  $\text{cm}^{-1}$ ): 2973, 2946, 2871, 1629, 1458, 1432, 1381, 1283, 1220, 1098, 1062; MS (70 ev, EI)  $m/z$  (%): 273 ( $\text{M}^+$ , 31.34), 201 (100); HRMS Calcd for  $\text{C}_{17}\text{H}_{23}\text{NO}_2$  ( $\text{M}^+$ ): 273.1729, Found: 273.1728.

## 6. Preparation of (*R*)-2-(1-(4-iodophenyl)vinyl)tetrahydrofuran **2f** (xx-6-40)

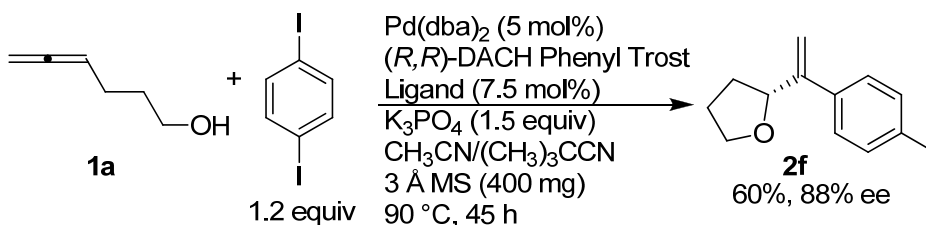

The reaction of **1d** (98.1 mg, 1.0 mmol),  $\text{CH}_3\text{CN}$  (2.4 mL),  $(\text{CH}_3)_3\text{CCN}$  (1.6 mL),  $\text{K}_3\text{PO}_4$  (318.5 mg, 1.5 mmol), 3 Å molecular sieve (400 mg),  $\text{Pd}(\text{dba})_2$  (28.8 mg, 0.050 mmol), *(R,R)*-DACH Phenyl Trost Ligand (51.7 mg, 0.075 mmol), and 1,4-diiodobenzene (395.8 mg, 1.2 mmol) afforded (*R*)-**2f** (179.3 mg, 60%, 88% ee)



(eluent: petroleum ether/ethyl ether = 40/1 to 20/1) (HPLC conditions: OJ-H column, rate = 0.5 mL/min, eluent: hexane/*i*-PrOH = 98:2,  $\lambda$  = 230 nm,  $t_{\text{R}}$ (major) = 13.4 min,  $t_{\text{R}}$ (minor) = 14.8 min); liquid;  $^1\text{H}$  NMR (300 MHz,  $\text{CDCl}_3$ )  $\delta$  7.69-7.60 (m, 2 H, Ar-H), 7.17-7.09 (m, 2 H, Ar-H), 5.37 (dd,  $J$  = 1.2, 0.9 Hz, 1 H, one proton from  $\text{H}_2\text{C}=\text{}$ ), 5.29 (dd,  $J$  = 1.2, 0.9 Hz, 1 H, one proton from  $\text{H}_2\text{C}=\text{}$ ), 4.78 (t,  $J$  = 6.9 Hz, 1 H, OCH), 4.00 (dt,  $J$  = 8.1, 6.6 Hz, 1 H, one proton from  $\text{OCH}_2$ ), 3.87 (dt,  $J$  = 8.1, 7.1 Hz, 1 H, one proton from  $\text{OCH}_2$ ), 2.12-2.00 (m, 1 H, one proton from  $\text{CH}_2\text{CH}_2$ ), 1.96-1.81 (m, 2 H, two protons from  $\text{CH}_2\text{CH}_2$ ), 1.70-1.52 (m, 1 H, one proton from  $\text{CH}_2\text{CH}_2$ );  $^{13}\text{C}$  NMR (75.4 MHz,  $\text{CDCl}_3$ )  $\delta$  148.5, 139.3, 137.2, 128.6, 112.4, 93.0, 79.8, 68.4, 31.5, 25.5; IR (neat,  $\text{cm}^{-1}$ ): 2973, 2947, 2865, 1484, 1385, 1178, 1065, 1054, 1004; MS (70 ev, EI)  $m/z$  (%): 300 ( $\text{M}^+$ , 34.41), 71 (100); HRMS Calcd for  $\text{C}_{12}\text{H}_{13}\text{OI}$  ( $\text{M}^+$ ): 300.0011, Found: 300.0012.

#### 7. Preparation of (*R*)-2-(1-(4-bromophenyl)vinyl)tetrahydrofuran **2g** (xx-6-34)

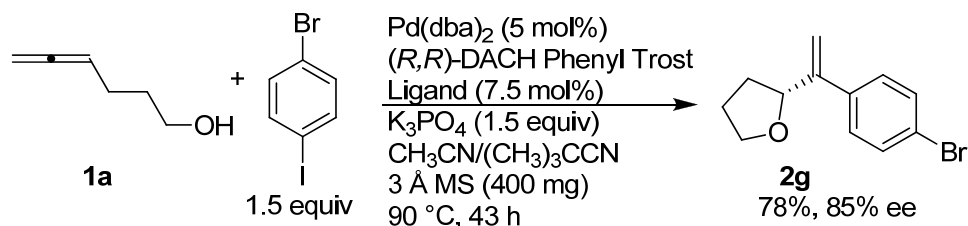

The reaction of **1a** (98.1 mg, 1.0 mmol),  $\text{CH}_3\text{CN}$  (2.4 mL),  $(\text{CH}_3)_3\text{CCN}$  (1.6 mL),  $\text{K}_3\text{PO}_4$  (318.3 mg, 1.5 mmol), 3 Å molecular sieve (400 mg),  $\text{Pd}(\text{dba})_2$  (28.8 mg, 0.050 mmol), (*R,R*)-DACH Phenyl Trost Ligand (51.9 mg, 0.075 mmol), and 1-bromo-4-iodobenzene (424.2 mg, 1.5 mmol) afforded (*R*)-**2g** (197.1 mg, 78%, 85% ee) (eluent: petroleum ether/ethyl acetate = 40/1 to 20/1) (HPLC conditions: OJ-H column, rate = 0.6 mL/min, eluent: hexane/*i*-PrOH = 98:2,  $\lambda$  = 214 nm,  $t_{\text{R}}$ (major) = 10.5 min,  $t_{\text{R}}$ (minor) = 11.9 min); liquid;  $^1\text{H}$  NMR (300 MHz,  $\text{CDCl}_3$ )  $\delta$  7.54-7.38 (m, 2 H, Ar-H), 7.32-7.20 (m, 2 H, Ar-H), 5.42-5.34 (m, 1 H, one proton from  $\text{H}_2\text{C}=\text{}$ ), 5.29 (s, 1 H, one proton from  $\text{H}_2\text{C}=\text{}$ ), 4.79 (t,  $J$  = 6.8 Hz, 1 H, OCH), 4.06-3.94 (m, 1 H, one proton from  $\text{OCH}_2$ ), 3.92-3.80 (m, 1 H, one proton from  $\text{OCH}_2$ ), 2.16-2.00 (m, 1 H, one proton from  $\text{CH}_2\text{CH}_2$ ), 1.99-1.75 (m, 2 H, two protons from  $\text{CH}_2\text{CH}_2$ ), 1.68-1.52 (m, 1 H, one proton from  $\text{CH}_2\text{CH}_2$ );  $^{13}\text{C}$  NMR (75.4 MHz,  $\text{CDCl}_3$ )  $\delta$  148.4,

138.7, 131.3, 128.4, 121.4, 112.4, 79.9, 68.4, 31.5, 25.5; IR (neat,  $\text{cm}^{-1}$ ): 2975, 2948, 2868, 1630, 1588, 1487, 1390, 1179, 1073, 1058, 1008; MS (70 ev, EI)  $m/z$  (%): 254 [ $\text{M}^+(\text{}^{81}\text{Br})$ , 12.86], 252 [ $\text{M}^+(\text{}^{79}\text{Br})$ , 13.32], 71 (100); HRMS Calcd for  $\text{C}_{12}\text{H}_{13}\text{O}^{79}\text{Br}$  ( $\text{M}^+$ ): 252.0150, Found: 252.0151.

## 8. Preparation of (*R*)-2-(1-(4-acetylphenyl)vinyl)tetrahydrofuran **2h** (xx-6-25)

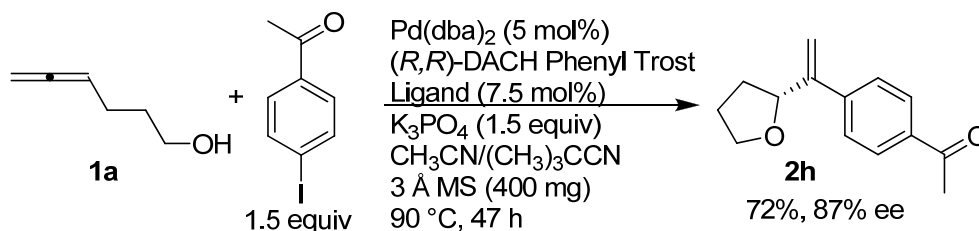

The reaction of **1d** (98.2 mg, 1.0 mmol),  $\text{CH}_3\text{CN}$  (3.6 mL),  $(\text{CH}_3)_3\text{CCN}$  (2.4 mL),  $\text{K}_3\text{PO}_4$  (318.5 mg, 1.5 mmol), 3 Å molecular sieve (400 mg),  $\text{Pd(dba)}_2$  (28.7 mg, 0.050 mmol), (*R,R*)-DACH Phenyl Trost Ligand (51.9 mg, 0.075 mmol), and 1-(4-iodophenyl)ethanone (369.0 mg, 1.5 mmol) afforded (*R*)-**2h** (156.7 mg, 72%, 87% ee) (eluent: petroleum ether/ethyl acetate = 20/1 to 10/1) (HPLC conditions: AS-H column, rate = 1.0 mL/min, eluent: hexane/*i*-PrOH = 98:2,  $\lambda$  = 214 nm,  $t_{\text{R}}$ (minor) = 21.1 min,  $t_{\text{R}}$ (major) = 23.6 min); liquid;  $^1\text{H}$  NMR (300 MHz,  $\text{CDCl}_3$ )  $\delta$  7.95-7.87 (m, 2 H, Ar-H), 7.52-7.43 (m, 2 H, Ar-H), 5.46 (dd,  $J$  = 1.5, 1.2 Hz, 1 H, one proton from  $\text{H}_2\text{C}=\text{}$ ), 5.38 (s, 1 H, one proton from  $\text{H}_2\text{C}=\text{}$ ), 4.85 (t,  $J$  = 6.9 Hz, 1 H, OCH), 4.01 (dt,  $J$  = 8.1, 6.6 Hz, 1 H, one proton from  $\text{OCH}_2$ ), 3.88 (dt,  $J$  = 8.1, 7.1 Hz, 1 H, one proton from  $\text{OCH}_2$ ), 2.59 (s, 3 H,  $\text{CH}_3$ ), 2.16-2.02 (m, 1 H, one proton from  $\text{CH}_2\text{CH}_2$ ), 1.98-1.84 (m, 2 H, two protons from  $\text{CH}_2\text{CH}_2$ ), 1.68-1.53 (m, 1 H, one proton from  $\text{CH}_2\text{CH}_2$ );  $^{13}\text{C}$  NMR (75.4 MHz,  $\text{CDCl}_3$ )  $\delta$  197.6, 148.7, 144.6, 136.1, 128.3, 126.9, 113.6, 79.8, 68.4, 31.6, 26.5, 25.5; IR (neat,  $\text{cm}^{-1}$ ): 2975, 2872, 1681, 1604, 1405, 1358, 1266, 1187, 1057; MS (70 ev, EI)  $m/z$  (%): 216 ( $\text{M}^+$ , 65.87), 71 (100); HRMS Calcd for  $\text{C}_{14}\text{H}_{16}\text{O}_2$  ( $\text{M}^+$ ): 216.1150, Found: 216.1151.

## 9. Preparation of (*R*)-2-(1-(4-ethoxycarbonylphenyl)vinyl)tetrahydrofuran **2i** (xx-6-98)

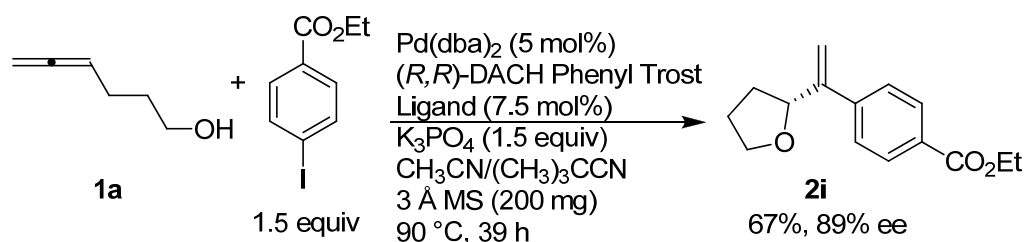

The reaction of **1a** (49.0 mg, 0.5 mmol), CH<sub>3</sub>CN (1.8 mL), (CH<sub>3</sub>)<sub>3</sub>CCN (1.2 mL), K<sub>3</sub>PO<sub>4</sub> (159.1 mg, 0.75 mmol), 3 Å molecular sieve (200 mg), Pd(dba)<sub>2</sub> (14.4 mg, 0.025 mmol), (*R,R*)-DACH Phenyl Trost Ligand (25.8 mg, 0.0375 mmol), and ethyl 4-iodobenzoate (125 μL, *d* = 1.66 g/cm<sup>3</sup>, 207.1 mg, 0.75 mmol) afforded the mixture of **2i** and dba (eluent: petroleum ether/ethyl acetate = 10:1), which couldn't be separated via column chromatography on silica gel. Then MeOH (3 mL) and NaBH<sub>4</sub> (3.0 mg, 0.08 mmol) were added and the resulting mixture was stirred at RT for half an hour. The solvent was evaporated under vacuum, and the residue was purified by chromatography on silica gel (eluent: petroleum ether/ethyl acetate = 5:1) to afford (*R*)-**2i** (81.8 mg, 67%, 89% ee) (HPLC conditions: AS-H column, rate = 0.5 mL/min, eluent: hexane/*i*-PrOH = 98:2, λ = 230 nm, *t*<sub>R</sub>(minor) = 15.9 min, *t*<sub>R</sub>(major) = 19.0 min); liquid; <sup>1</sup>H NMR (300 MHz, CDCl<sub>3</sub>) δ 8.04-7.94 (m, 2 H, Ar-H), 7.50-7.40 (m, 2 H, Ar-H), 5.45 (dd, *J* = 1.6, 1.6 Hz, 1 H, one proton from H<sub>2</sub>C=), 5.38 (s, 1 H, one proton from H<sub>2</sub>C=), 4.86 (t, *J* = 6.9 Hz, 1 H, OCH), 4.37 (q, *J* = 7.2 Hz, 2 H, COOCH<sub>2</sub>), 4.02 (dt, *J* = 8.1, 6.6 Hz, 1 H, one proton from OCH<sub>2</sub>), 3.93-3.83 (m, 1 H, one proton from OCH<sub>2</sub>), 2.16-2.02 (m, 1 H, one proton from CH<sub>2</sub>CH<sub>2</sub>), 1.98-1.84 (m, 2 H, two protons from CH<sub>2</sub>CH<sub>2</sub>), 1.68-1.53 (m, 1 H, one proton from CH<sub>2</sub>CH<sub>2</sub>), 1.39 (t, *J* = 7.2 Hz, 3 H, CH<sub>3</sub>); <sup>13</sup>C NMR (75.4 MHz, CDCl<sub>3</sub>) δ 166.3, 148.7, 144.3, 129.43, 129.36, 126.6, 113.3, 79.7, 68.4, 60.8, 31.5, 25.5, 14.2; IR (neat, cm<sup>-1</sup>): 2980, 2870, 1714, 1608, 1367, 1273, 1181, 1101, 1060, 1019; MS (70 eV, EI) *m/z* (%): 246 (M<sup>+</sup>, 15.95), 71 (100); HRMS Calcd for C<sub>15</sub>H<sub>18</sub>O<sub>3</sub>(M<sup>+</sup>): 246.1256, Found: 246.1257.

#### 10. Preparation of (*R*)-3,3-dimethyl-2-(1-phenylvinyl)tetrahydrofuran **2j** (xx-6-99)

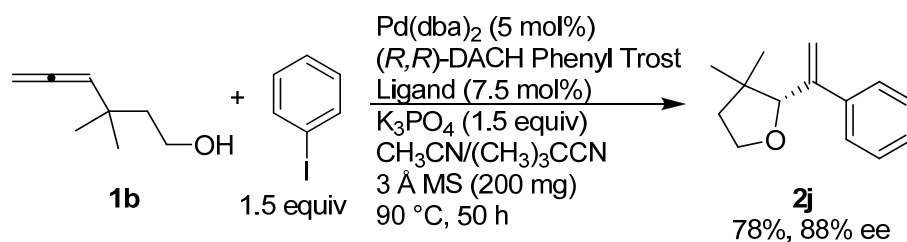

The reaction of **1b** (63.2 mg, 0.5 mmol), CH<sub>3</sub>CN (1.2 mL), (CH<sub>3</sub>)<sub>3</sub>CCN (0.8 mL), K<sub>3</sub>PO<sub>4</sub> (159.2 mg, 0.75 mmol), 3 Å molecular sieve (200 mg), Pd(dba)<sub>2</sub> (14.4 mg, 0.025 mmol), (*R,R*)-DACH Phenyl Trost Ligand (25.8 mg, 0.0375 mmol), and iodobenzene (85 μL, d = 1.81 g/cm<sup>3</sup>, 153.9 mg, 0.75 mmol) afforded (*R*)-**2j** (79.2 mg, 78%, 88% ee) (eluent: petroleum ether/ethyl ether = 30/1) (HPLC conditions: AD-H column, rate = 0.5 mL/min, eluent: hexane/*i*-PrOH = 95:5, λ = 230 nm, *t*<sub>R</sub>(minor) = 7.7 min, *t*<sub>R</sub>(major) = 12.7 min); liquid; <sup>1</sup>H NMR (300 MHz, CDCl<sub>3</sub>) δ 7.38-7.21 (m, 5 H, Ar-H), 5.39 (dd, *J* = 2.1, 1.5 Hz, 1 H, one proton from H<sub>2</sub>C=), 5.25 (dd, *J* = 2.1, 0.9 Hz, 1 H, one proton from H<sub>2</sub>C=), 4.59-4.55 (m, 1 H, OCH), 4.06-3.89 (m, 2 H, OCH<sub>2</sub>), 1.91-1.72 (m, 2 H, CH<sub>2</sub>), 0.80 (s, 3 H, CH<sub>3</sub>), 0.76 (s, 3 H, CH<sub>3</sub>); <sup>13</sup>C NMR (75.4 MHz, CDCl<sub>3</sub>) δ 147.5, 141.2, 128.1, 127.3, 127.2, 113.5, 87.4, 65.5, 41.9, 41.4, 26.6, 22.7; IR (neat, cm<sup>-1</sup>): 2961, 2933, 2871, 1632, 1574, 1494, 1464, 1386, 1163, 1113, 1064, 1030, 1004; MS (70 ev, EI) *m/z* (%): 202 (M<sup>+</sup>, 75.38), 70 (100); HRMS Calcd for C<sub>14</sub>H<sub>18</sub>O (M<sup>+</sup>): 202.1358, Found: 202.1359.

## 11. Preparation of (*R*)-4,4-dimethyl-2-(1-phenylvinyl)tetrahydrofuran **2k** (xx-6-97)

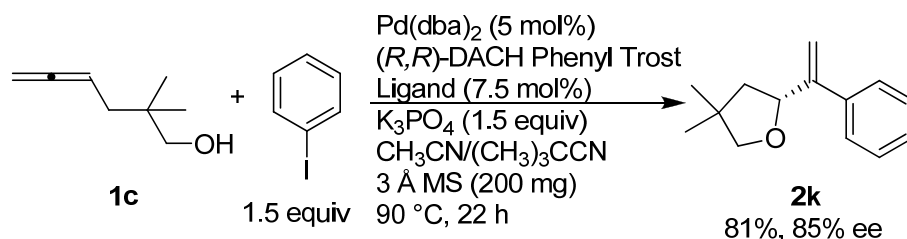

The reaction of **1c** (62.8 mg, 0.5 mmol), CH<sub>3</sub>CN (1.8 mL), (CH<sub>3</sub>)<sub>3</sub>CCN (1.2 mL), K<sub>3</sub>PO<sub>4</sub> (159.2 mg, 0.75 mmol), 3 Å molecular sieve (200 mg), Pd(dba)<sub>2</sub> (14.6 mg, 0.025 mmol), (*R,R*)-DACH Phenyl Trost Ligand (25.8 mg, 0.0375 mmol), and iodobenzene (85 μL, d = 1.81 g/cm<sup>3</sup>, 153.9 mg, 0.75 mmol) afforded (*R*)-**2k** (82.0 mg, 81%, 85% ee) (eluent: petroleum ether/ethyl ether = 30/1) (HPLC conditions: AD-H

column, rate = 0.5 mL/min, eluent: hexane/*i*-PrOH = 95:5,  $\lambda$  = 230 nm,  $t_R$ (minor) = 8.0 min,  $t_R$ (major) = 9.5 min); liquid;  $^1\text{H}$  NMR (300 MHz,  $\text{CDCl}_3$ )  $\delta$  7.41-7.21 (m, 5 H, Ar-H), 5.44 (dd,  $J$  = 1.5, 1.5 Hz, 1 H, one proton from  $\text{H}_2\text{C}=\text{}$ ), 5.27 (dd,  $J$  = 1.2, 1.2 Hz, 1 H, one proton from  $\text{H}_2\text{C}=\text{}$ ), 5.03-4.95 (m, 1 H, OCH), 3.65 (d,  $J$  = 7.8 Hz, 1 H, one proton from  $\text{OCH}_2$ ), 3.61 (d,  $J$  = 8.4 Hz, 1 H, one proton from  $\text{OCH}_2$ ), 1.92 (dd,  $J$  = 12.3, 7.2 Hz, 1 H, one proton from  $\text{CH}_2$ ), 1.48 (dd,  $J$  = 12.2, 9.2 Hz, 1 H, one proton from  $\text{CH}_2$ ), 1.14 (s, 3 H,  $\text{CH}_3$ ), 1.06 (s, 3 H,  $\text{CH}_3$ );  $^{13}\text{C}$  NMR (75.4 MHz,  $\text{CDCl}_3$ )  $\delta$  149.9, 139.9, 128.2, 127.4, 126.7, 110.9, 80.4, 80.1, 47.1, 39.9, 26.5, 26.2; IR (neat,  $\text{cm}^{-1}$ ): 2957, 2869, 1495, 1465, 1368, 1285, 1059, 1028; MS (70 ev, EI)  $m/z$  (%): 202 ( $\text{M}^+$ , 50.07), 103 (100); HRMS Calcd for  $\text{C}_{14}\text{H}_{18}\text{O}$  ( $\text{M}^+$ ): 202.1358, Found: 202.1359.

## 12. Preparation of (*R*)-2,2-dimethyl-5-(1-phenylvinyl)tetrahydrofuran **21** (xx-6-100)

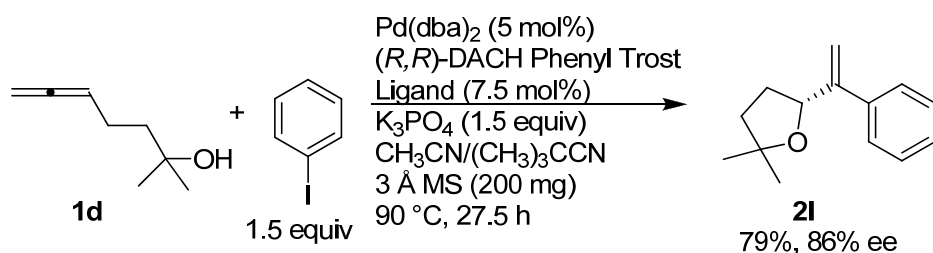

The reaction of **1d** (63.3 mg, 0.5 mmol),  $\text{CH}_3\text{CN}$  (2.0 mL),  $(\text{CH}_3)_3\text{CCN}$  (1.35 mL),  $\text{K}_3\text{PO}_4$  (159.3 mg, 0.75 mmol), 3 Å molecular sieve (200 mg),  $\text{Pd}(\text{dba})_2$  (14.4 mg, 0.025 mmol), (*R,R*)-DACH Phenyl Trost Ligand (25.8 mg, 0.0375 mmol), and iodobenzene (85  $\mu\text{L}$ ,  $d = 1.81 \text{ g/cm}^3$ , 153.9 mg, 0.75 mmol) afforded (*R*)-**21** (80.5 mg, 79%, 86% ee) (eluent: petroleum ether/ethyl ether = 30/1) (HPLC conditions: AD-H column, rate = 0.5 mL/min, eluent: hexane/*i*-PrOH = 95:5,  $\lambda$  = 230 nm,  $t_R$ (minor) = 7.8 min,  $t_R$ (major) = 9.9 min); liquid;  $^1\text{H}$  NMR (300 MHz,  $\text{CDCl}_3$ )  $\delta$  7.42-7.22 (m, 5 H, Ar-H), 5.45 (dd,  $J$  = 1.8, 1.5 Hz, 1 H, one proton from  $\text{H}_2\text{C}=\text{}$ ), 5.30-5.25 (m, 1 H, one proton from  $\text{H}_2\text{C}=\text{}$ ), 4.97-4.88 (m, 1 H, OCH), 2.23-2.10 (m, 1 H, one proton from  $\text{CH}_2\text{CH}_2$ ), 1.82-1.63 (m, 3 H, three protons from  $\text{CH}_2\text{CH}_2$ ), 1.35 (s, 3 H,  $\text{CH}_3$ ), 1.32 (s, 3 H,  $\text{CH}_3$ );  $^{13}\text{C}$  NMR (75.4 MHz,  $\text{CDCl}_3$ )  $\delta$  150.3, 140.2, 128.1, 127.3, 126.8, 111.5, 81.3, 79.6, 38.3, 32.6, 28.8, 28.0; IR (neat,  $\text{cm}^{-1}$ ): 2969, 2869, 1495, 1459, 1379,

1248, 1147, 1075, 1051; MS (70 ev, EI)  $m/z$  (%): 202 ( $M^+$ , 66.02), 81 (100); HRMS  
Calcd for  $C_{14}H_{18}O$  ( $M^+$ ): 202.1358, Found: 202.1356.

### 13. One-Gram-Scale-Preparation of (*R*)-2-(1-(4'-bromobiphenyl-4-yl)vinyl)- tetrahydrofuran **2m** (xx-6-86)

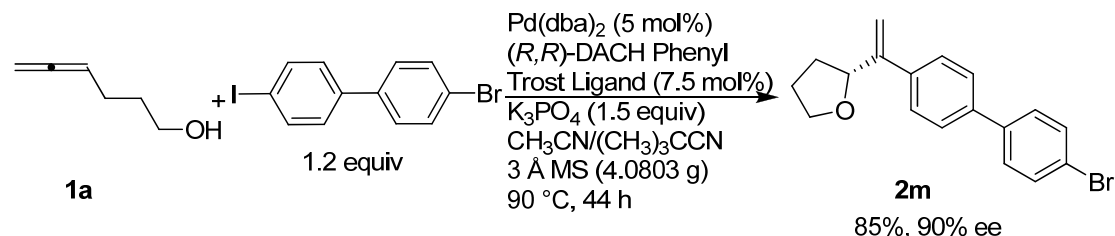

The reaction of **1a** (1.0013 g, 10.2 mmol), CH<sub>3</sub>CN (37 mL), (CH<sub>3</sub>)<sub>3</sub>CCN (25 mL), K<sub>3</sub>PO<sub>4</sub> (3.2480 g, 15.3 mmol), 3 Å molecular sieve (4.0803 g), Pd(dba)<sub>2</sub> (293.2 mg, 0.51 mmol), (*R,R*)-DACH Phenyl Trost Ligand (528.2 mg, 0.765 mmol), and 4-bromo-4'-iodobiphenyl (4.3940 g, 12.2 mmol) afforded (*R*)-**2m** and dba (eluent: petroleum ether/ethyl acetate = 20:1 to 10:1), which couldn't be separated via column chromatography on silica gel. Then MeOH (25 mL) and NaBH<sub>4</sub> (100.0 mg, 2.6 mmol) were added and the resulting mixture was stirred at RT for half an hour. The solvent was evaporated under vacuum, and the residue was purified by chromatography on silica gel (eluent: petroleum ether/ethyl acetate = 10:1) to afford (*R*)-**2m** (2.8632 g, 85%, 90% ee) (HPLC conditions: IC column, rate = 0.5 mL/min, eluent: hexane/*i*-PrOH = 95:5,  $\lambda$  = 214 nm,  $t_R$ (minor) = 14.3 min,  $t_R$ (major) = 15.1 min); solid; melting point: 98 °C (petroleum/ethyl acetate); <sup>1</sup>H NMR (300 MHz, CDCl<sub>3</sub>)  $\delta$  7.78-7.30 (m, 8 H, Ar-H), 5.40 (s, 1 H, one proton from H<sub>2</sub>C=), 5.36 (s, 1 H, one proton from H<sub>2</sub>C=), 4.88 (t, 1 H,  $J$  = 6.9 Hz, OCH), 4.12-3.98 (m, 1 H, one proton from OCH<sub>2</sub>), 3.98-3.81 (m, 1 H, one proton from OCH<sub>2</sub>), 2.20-2.02 (m, 1 H, one proton from CH<sub>2</sub>CH<sub>2</sub>), 2.00-1.84 (m, 2 H, two protons from CH<sub>2</sub>CH<sub>2</sub>), 1.72-1.57 (m, 1 H, one proton from CH<sub>2</sub>CH<sub>2</sub>); <sup>13</sup>C NMR (75.4 MHz, CDCl<sub>3</sub>)  $\delta$  148.8, 139.5, 139.1, 138.9, 131.8, 128.4, 127.1, 126.6, 121.5, 111.8, 79.8, 68.4, 31.7, 25.5; IR (neat, cm<sup>-1</sup>): 3037, 2951, 2861, 1479, 1191, 1107, 1061, 1035; MS (70 ev, EI)  $m/z$  (%): 330 ( $M^+$ (<sup>81</sup>Br), 25.56), 328 ( $M^+$ (<sup>79</sup>Br), 25.33), 71 (100); Anal. Calcd for C<sub>18</sub>H<sub>17</sub>BrO: C, 65.67; H, 5.20. Found: C, 65.70; H, 5.23.

**References:**

(1) Daniel J.; Lindsay A.; Jon T. *Org. Lett.* **2012**, *14*, 378 .

(2) Eric, J.; Jeffrey, A. *J. Heterocyclic Chem.* **1995**, *32*, 109.

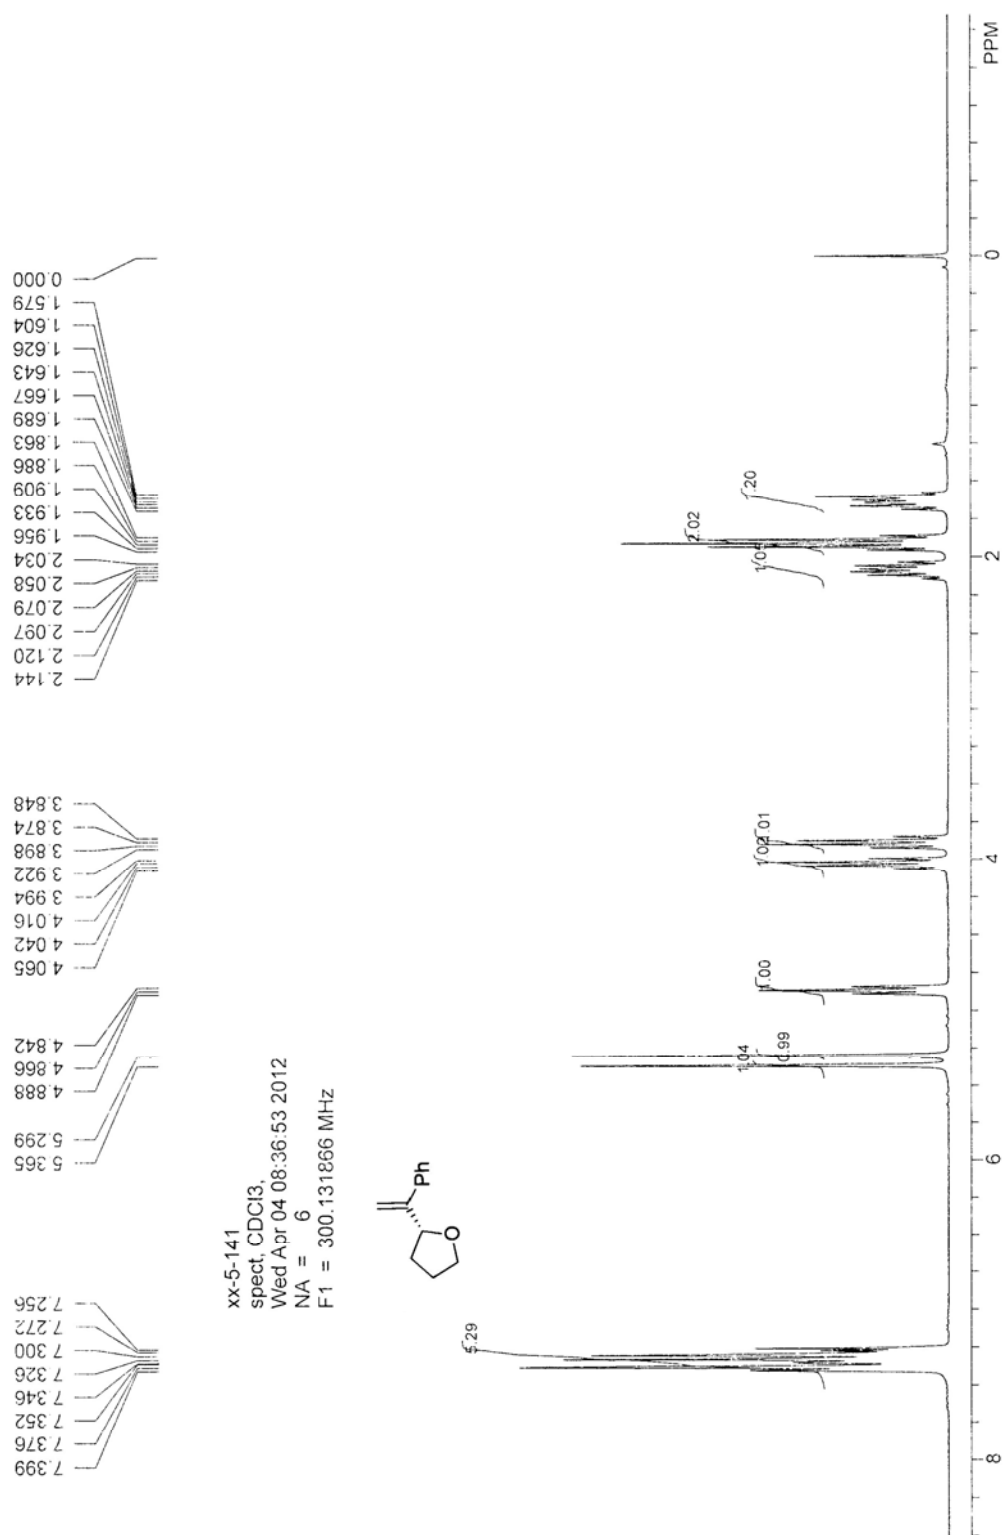



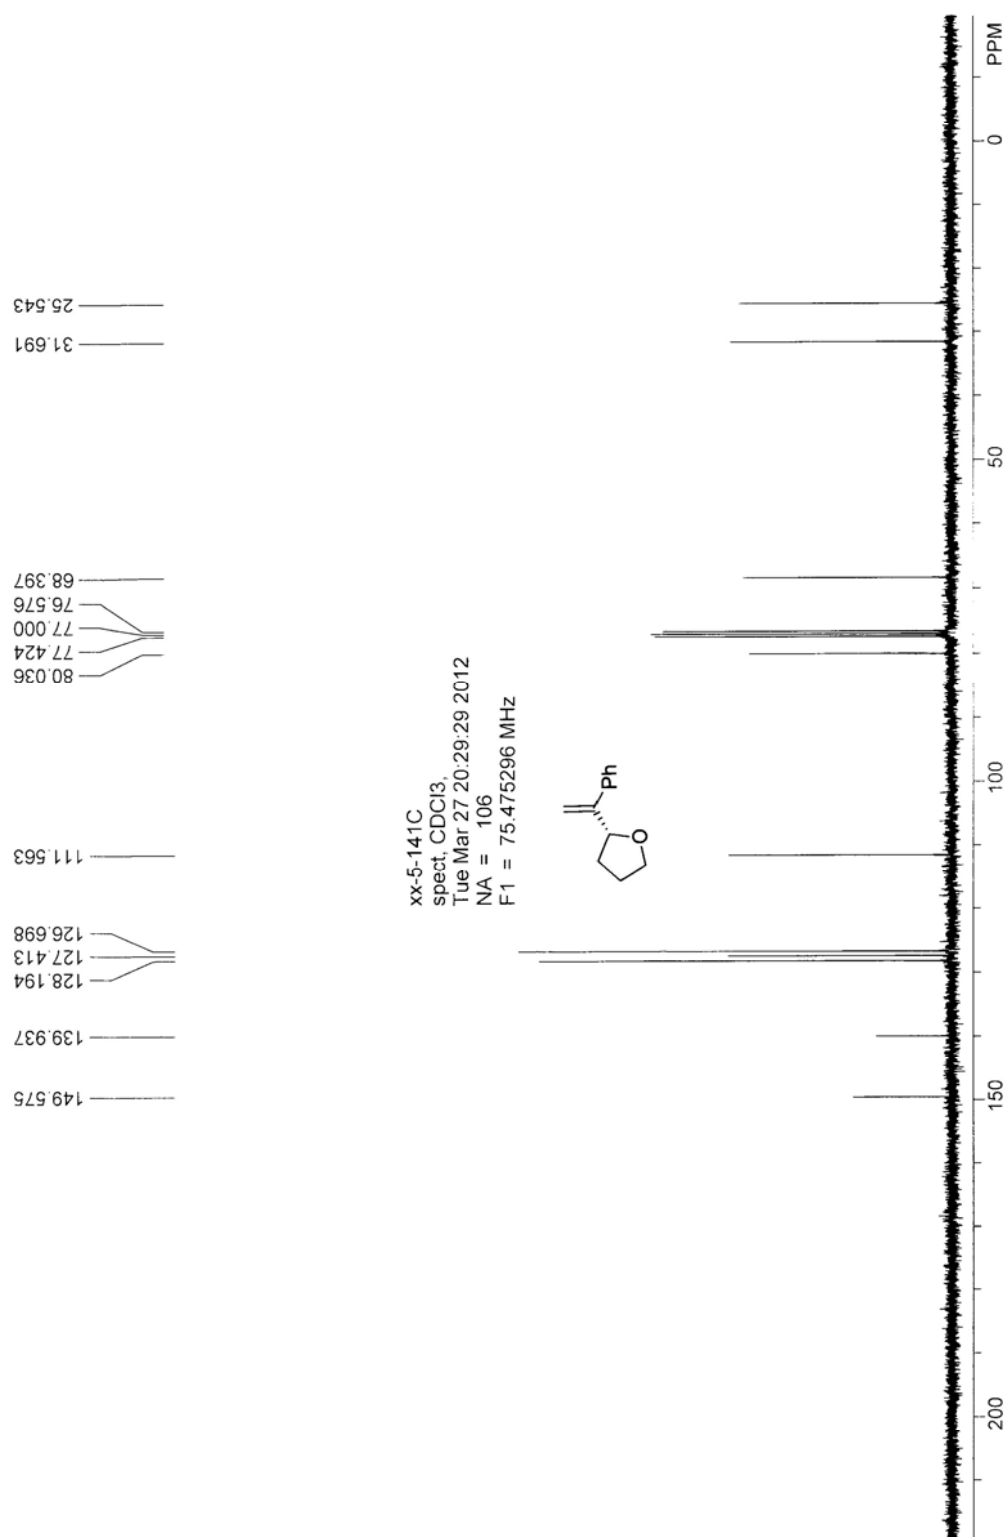

Operator:dell Timebase:U-3000 Sequence:LSH

Page 1-1  
 2010-3-27 3:52 P.M.

**415 xx-5-141**

AD-H-95-5-0.8-230

|                  |                |                   |          |
|------------------|----------------|-------------------|----------|
| Sample Name:     | xx-5-141       | Injection Volume: | 20.0     |
| Vial Number:     | 419            | Channel:          | UV_VIS_1 |
| Sample Type:     | unknown        | Wavelength:       | 230      |
| Control Program: | test           | Bandwidth:        | n.a.     |
| Quantif. Method: | test           | Dilution Factor:  | 1.0000   |
| Recording Time:  | 2010-3-27 3:37 | Sample Weight:    | 1.0000   |
| Run Time (min):  | 9.45           | Sample Amount:    | 1.0000   |

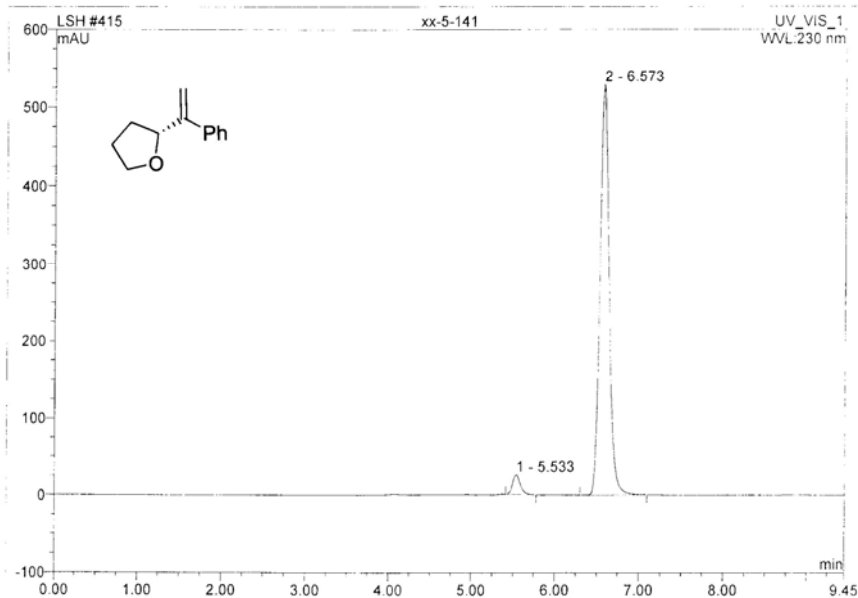

| No.           | Ret.Time<br>min | Peak Name | Height<br>mAU | Area<br>mAU*min | Rel.Area<br>% | Amount | Type |
|---------------|-----------------|-----------|---------------|-----------------|---------------|--------|------|
| 1             | 5.53            | n.a.      | 25.389        | 2.747           | 3.94          | n.a.   | BMB  |
| 2             | 6.57            | n.a.      | 528.895       | 66.969          | 96.06         | n.a.   | BMB  |
| <b>Total:</b> |                 |           | 554.284       | 69.715          | 100.00        | 0.000  |      |

default/Integration

Chromeleon (c) Dionex 1996-2006  
 Version 6.80 SR5 Build 2413 (137116)

Operator:dell Timebase:U-3000 Sequence:LSH

Page 1-1  
 2010-3-28 5:02

**417 xx-5-30**

AD-H-95-5-0.8-230

|                  |                |                   |          |
|------------------|----------------|-------------------|----------|
| Sample Name:     | xx-5-30        | Injection Volume: | 20.0     |
| Vial Number:     | 421            | Channel:          | UV_VIS_1 |
| Sample Type:     | unknown        | Wavelength:       | 230      |
| Control Program: | test           | Bandwidth:        | n.a.     |
| Quantif. Method: | test           | Dilution Factor:  | 1.0000   |
| Recording Time:  | 2010-3-27 5:08 | Sample Weight:    | 1.0000   |
| Run Time (min):  | 7.08           | Sample Amount:    | 1.0000   |

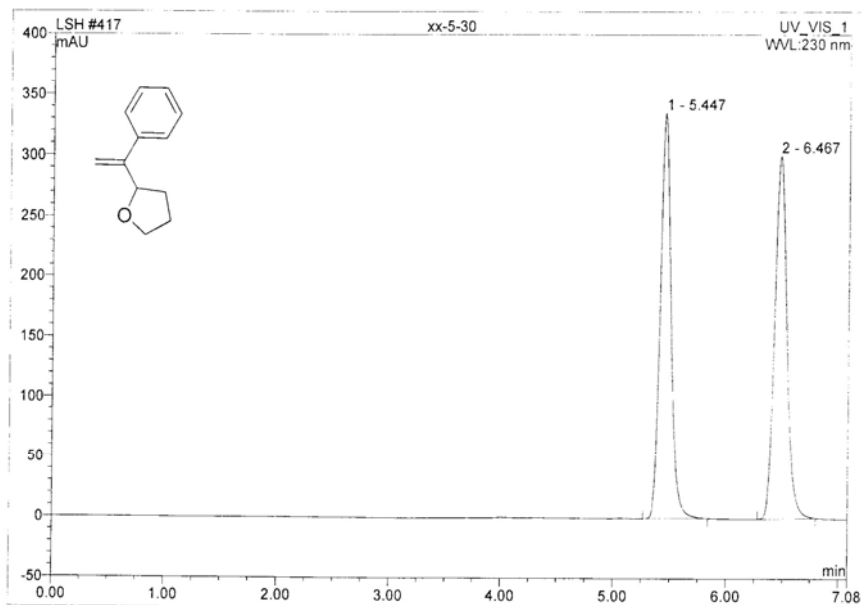

| No.           | Ret.Time<br>min | Peak Name | Height<br>mAU | Area<br>mAU*min | Rel.Area<br>% | Amount | Type |
|---------------|-----------------|-----------|---------------|-----------------|---------------|--------|------|
| 1             | 5.45            | n.a.      | 336.012       | 37.272          | 49.62         | n.a.   | BMB  |
| 2             | 6.47            | n.a.      | 300.891       | 37.848          | 50.38         | n.a.   | BMB  |
| <b>Total:</b> |                 |           | 636.902       | 75.120          | 100.00        | 0.000  |      |

default/Integration

Chromeleon (c) Dionex 1996-2006  
 Version 6.80 SR5 Build 2413 (137116)

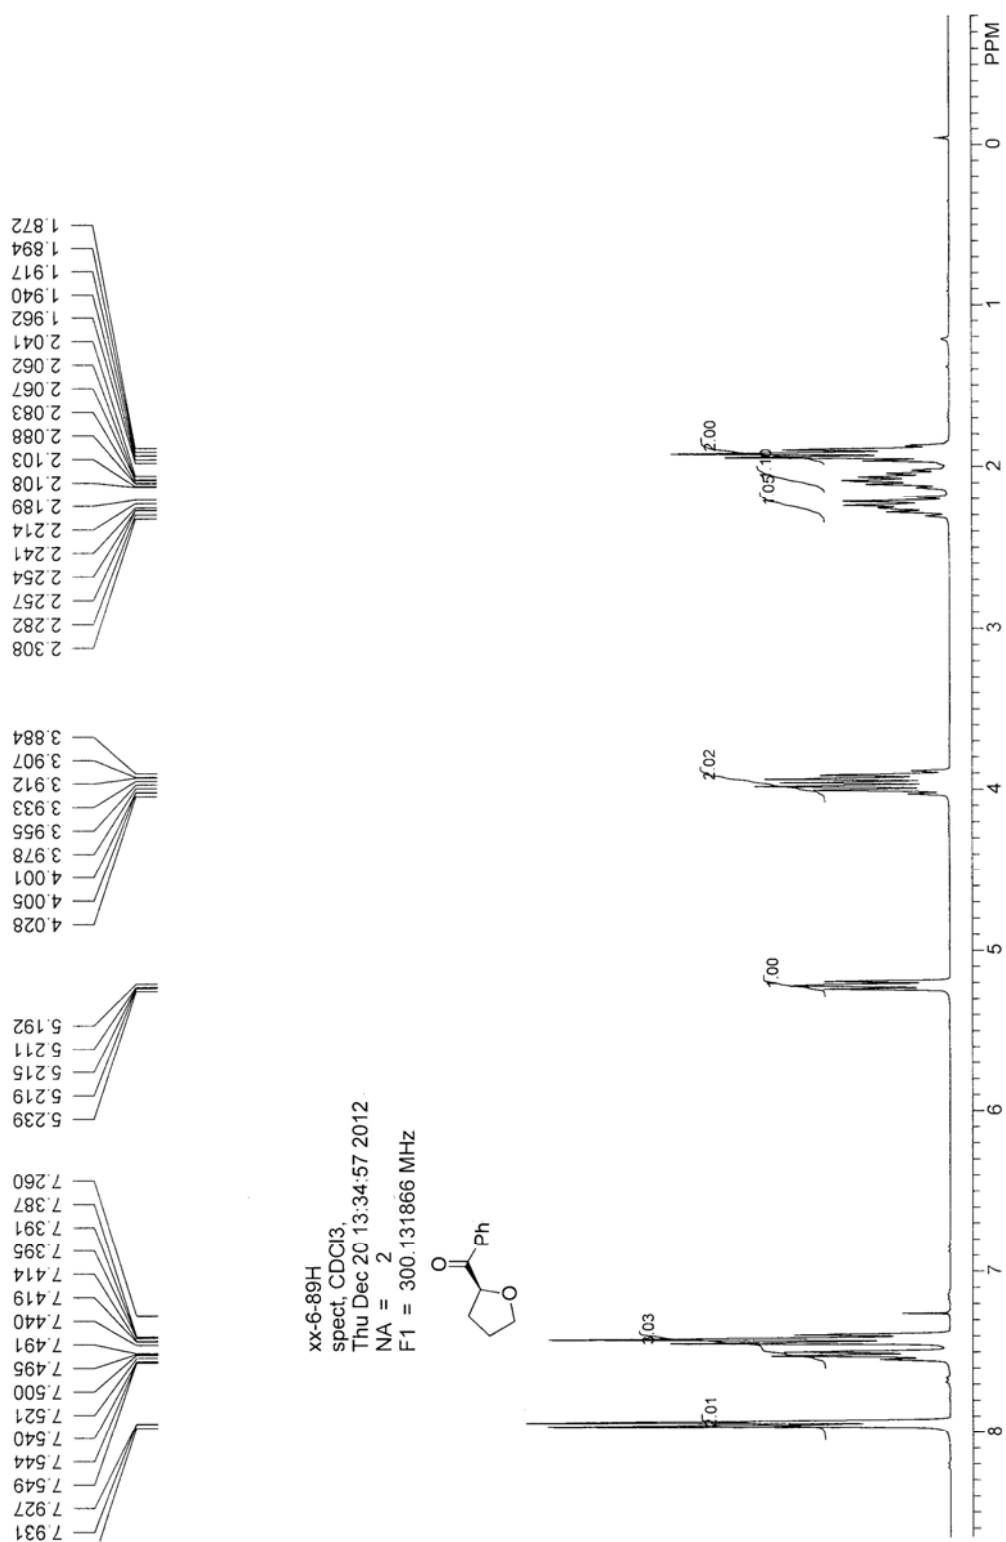

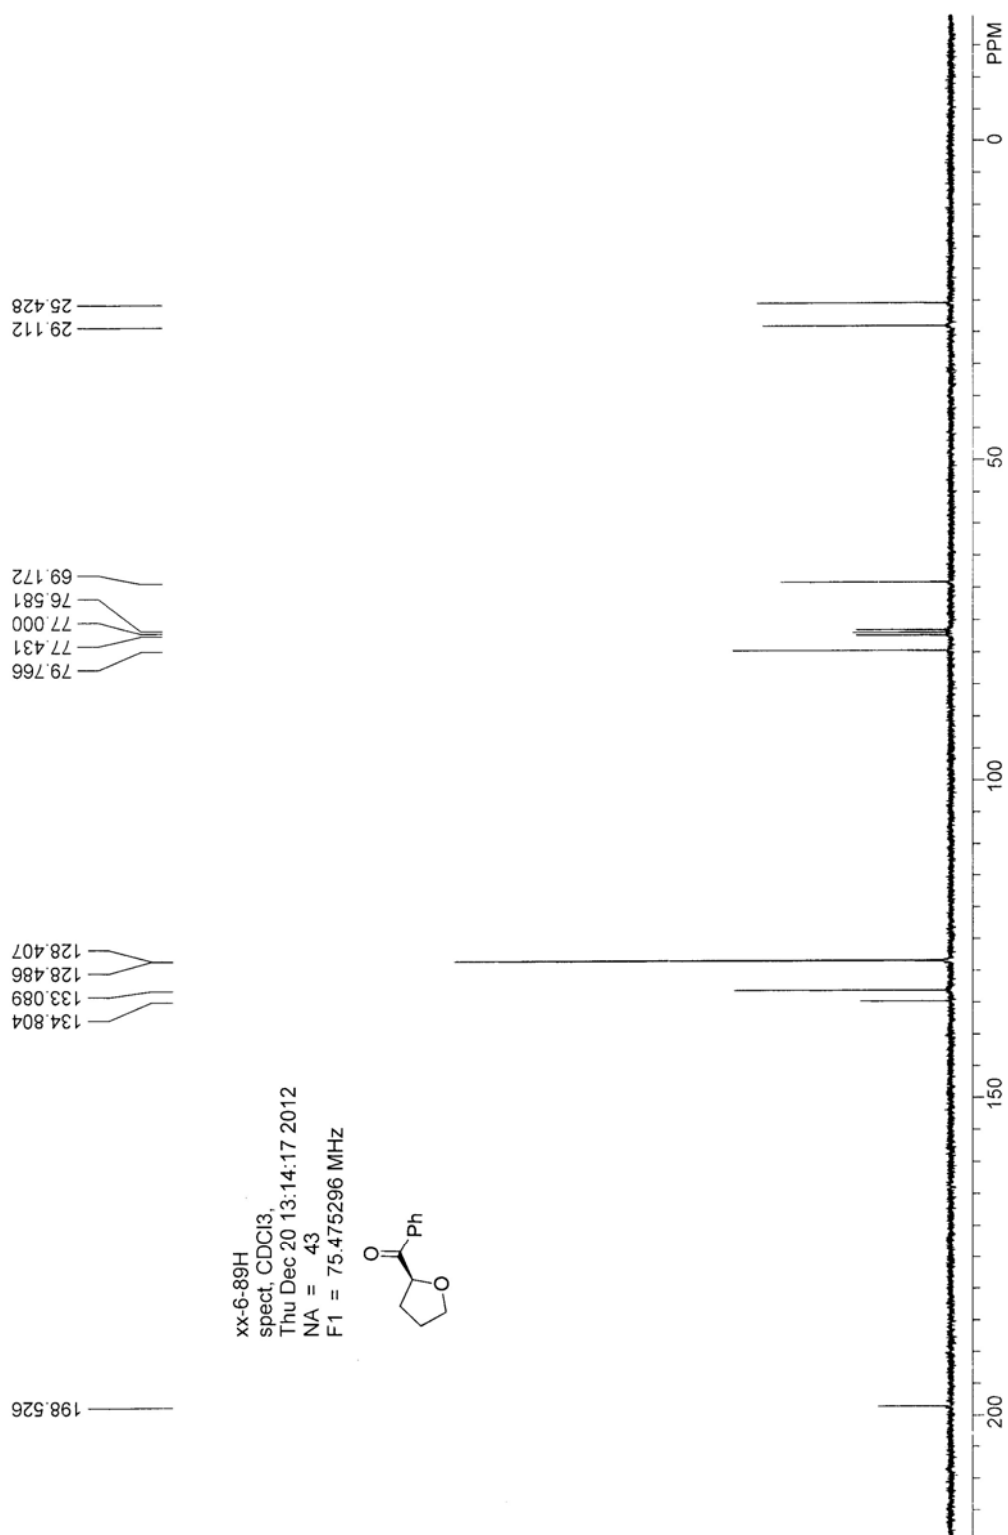

## XX-6-89

实验时间: 2012-12-25, 14:18:02 报告时间: 2012-12-25, 14:40:12  
谱图文件: F:\s1f\Xiexi\2012-12-25\XX-6-89\新建文件夹\XX-6-89-  
As-h-70+30-0.7-214.org

实验内容简介:  
As-h 70:30  
214nm 0.7ml/min

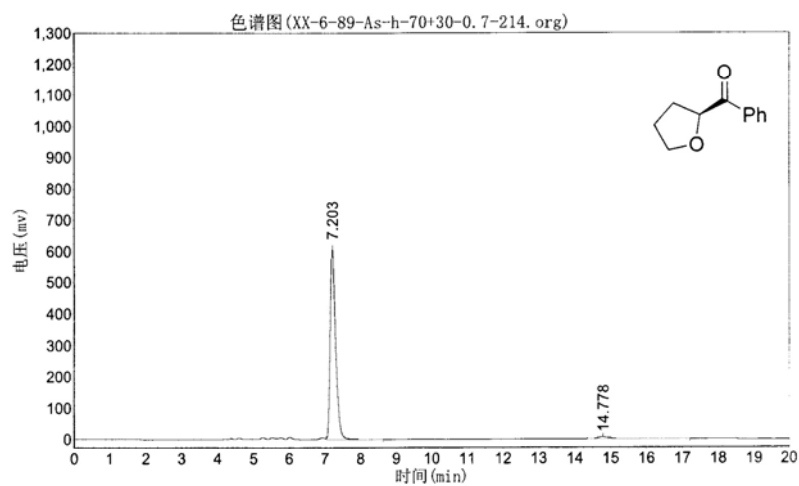

分析结果表

| 峰号 | 峰名 | 保留时间   | 峰高         | 峰面积         | 含量       |
|----|----|--------|------------|-------------|----------|
| 1  |    | 7.203  | 607788.063 | 6494072.500 | 97.8424  |
| 2  |    | 14.778 | 6294.112   | 143209.156  | 2.1576   |
| 总计 |    |        | 614082.174 | 6637281.656 | 100.0000 |

## XX-6-87

实验时间: 2012-12-25, 13:04:08

报告时间: 2012-12-25, 14:19:49

谱图文件: F:\slf\Xiexi\2012-12-25\新建文件夹\XX-6-87-As-h-70+30-0.7-214.org

实验内容简介:

As-h 70:30

214nm 0.7ml/min

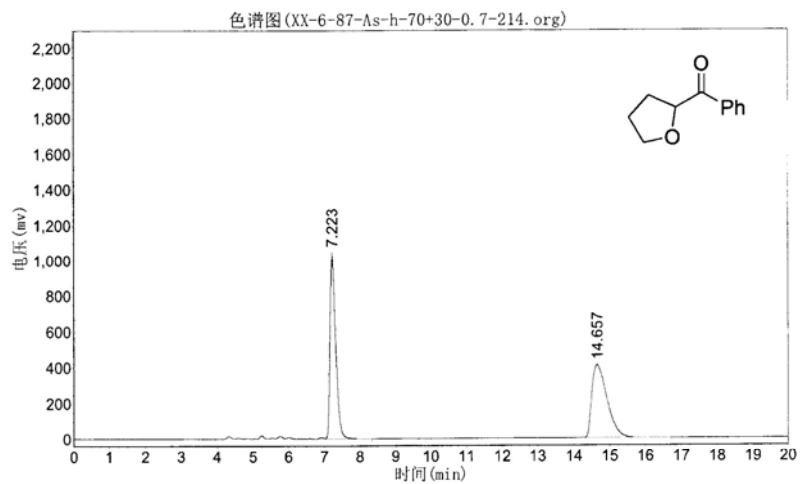

分析结果表

| 峰号 | 峰名 | 保留时间   | 峰高          | 峰面积          | 含量       |
|----|----|--------|-------------|--------------|----------|
| 1  |    | 7.223  | 1023824.438 | 11555903.000 | 49.1567  |
| 2  |    | 14.657 | 409319.656  | 11952417.000 | 50.8433  |
| 总计 |    |        | 1433144.094 | 23508320.000 | 100.0000 |

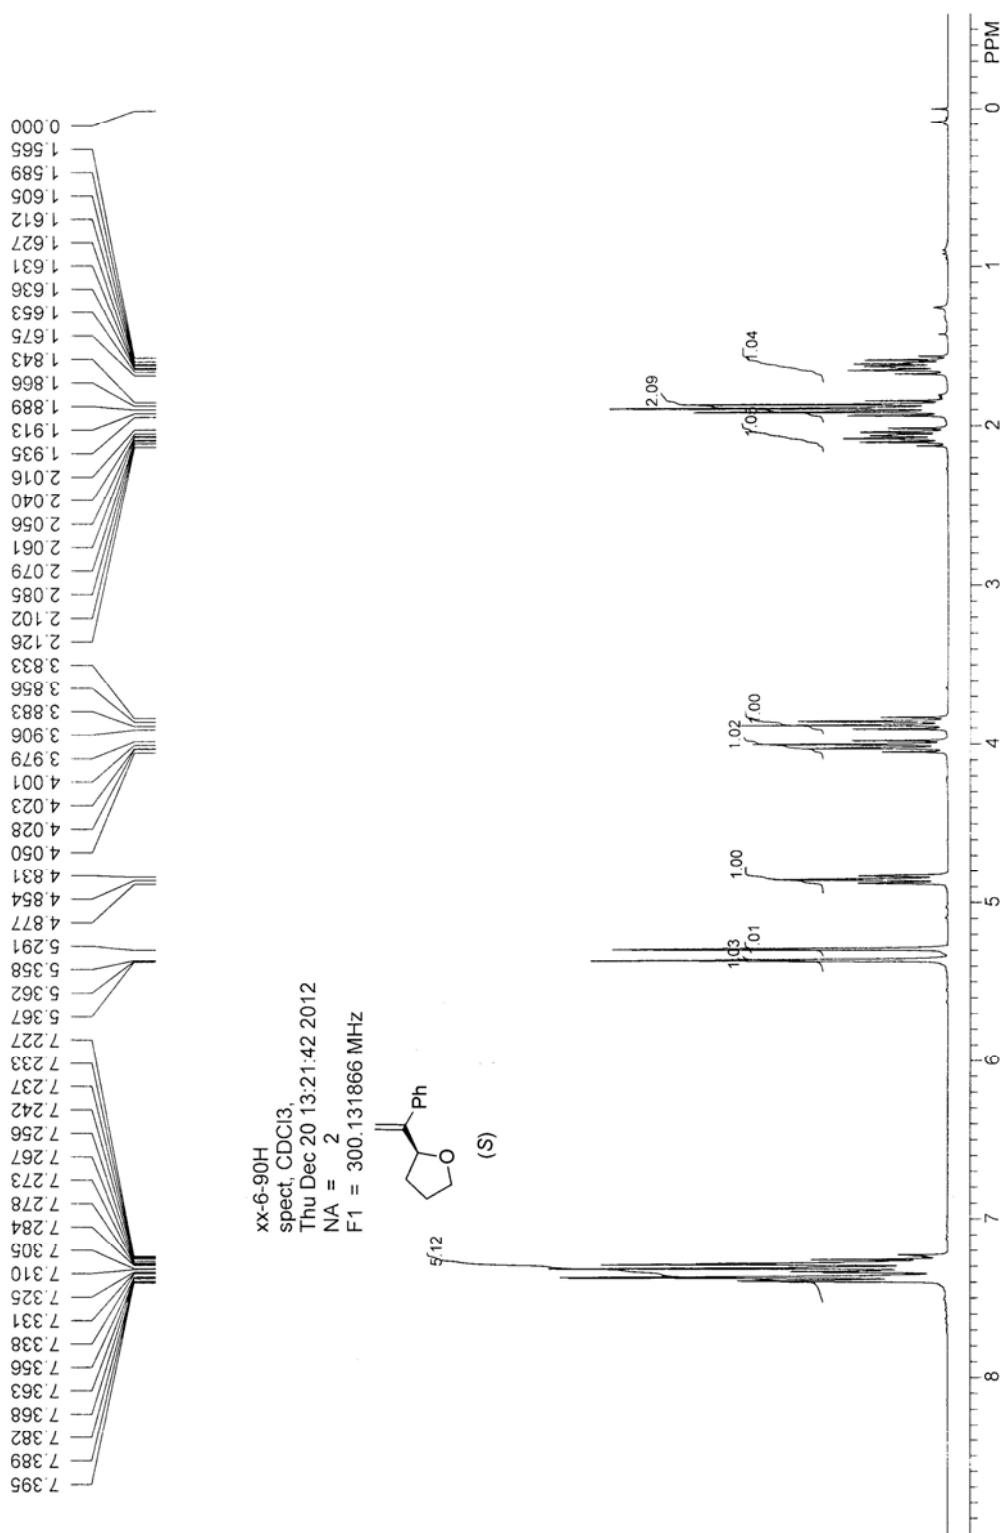



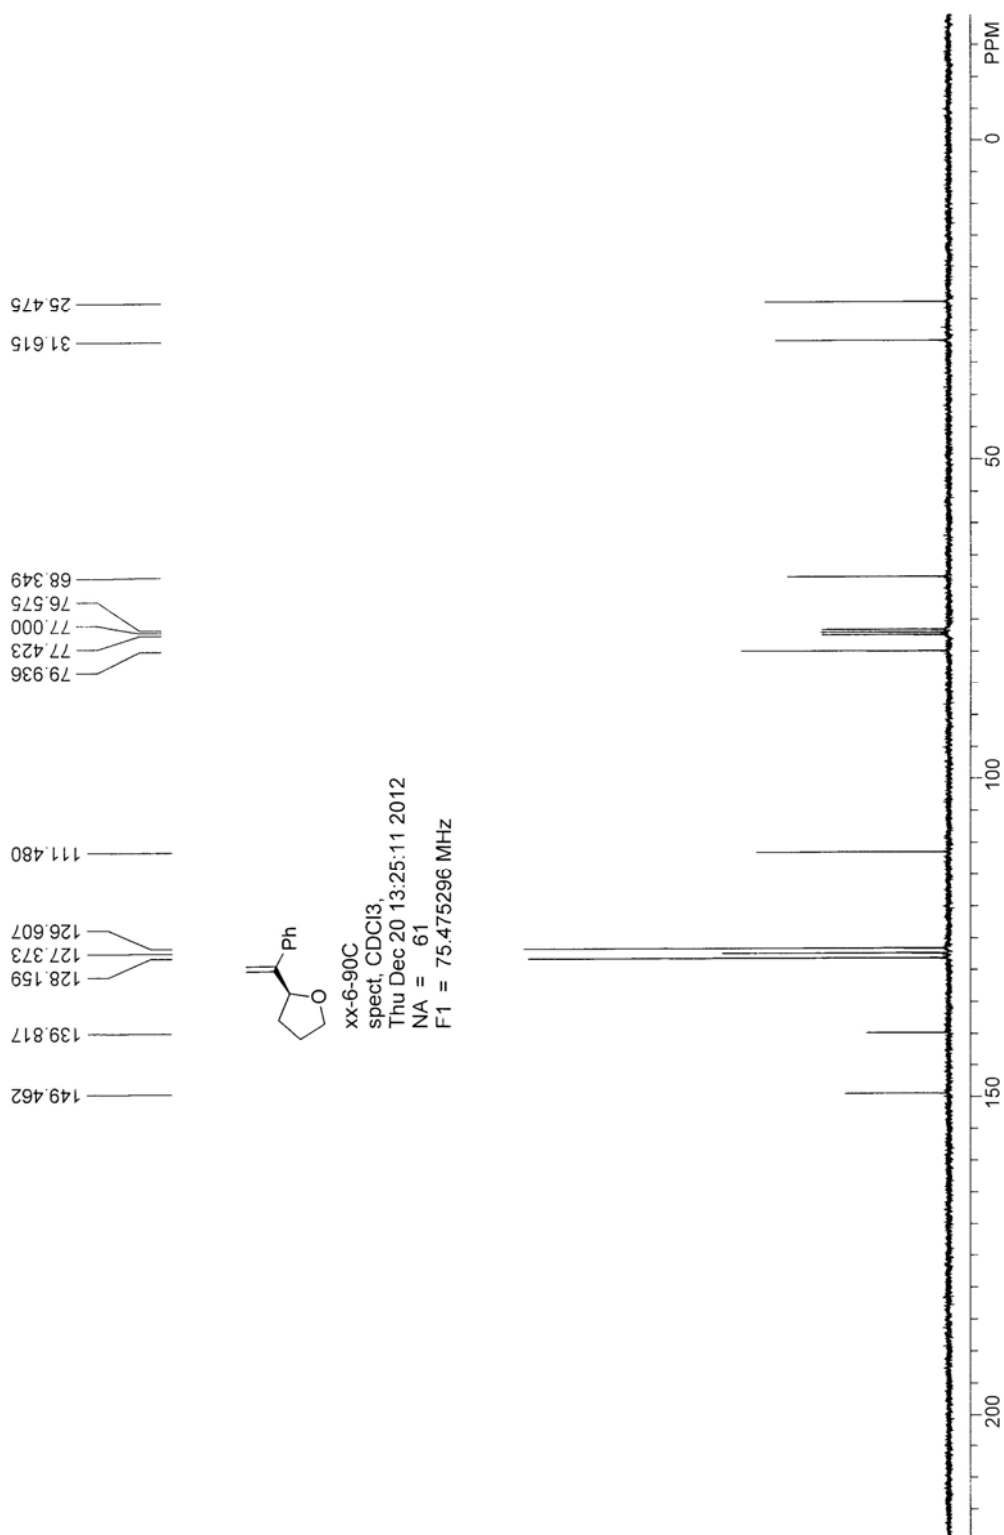

Operator:dell Timebase:U-3000 Sequence:xx

Page 1-1  
 2012-12-20 9:29 上午

|                    |                 |                   |          |
|--------------------|-----------------|-------------------|----------|
| <b>216 xx-6-90</b> |                 |                   |          |
| AD-H-95-5-0.8-230  |                 |                   |          |
| Sample Name:       | xx-6-90         | Injection Volume: | 20.0     |
| Vial Number:       | 350             | Channel:          | UV_VIS_1 |
| Sample Type:       | unknown         | Wavelength:       | 214      |
| Control Program:   | test            | Bandwidth:        | n.a.     |
| Quantif. Method:   | test            | Dilution Factor:  | 1.0000   |
| Recording Time:    | 2012-12-20 9:10 | Sample Weight:    | 1.0000   |
| Run Time (min):    | 10.18           | Sample Amount:    | 1.0000   |

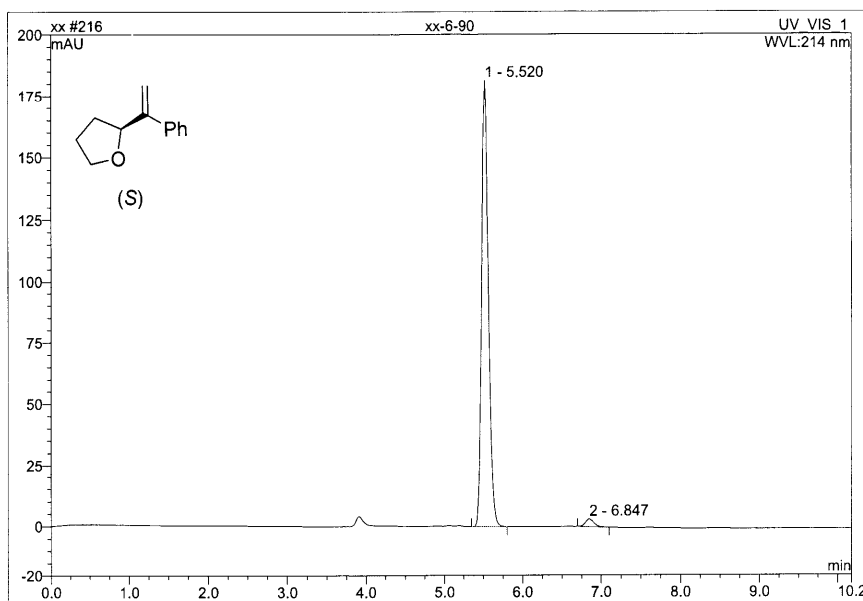

| No.           | Ret. Time min | Peak Name | Height mAU | Area mAU*min | Rel. Area % | Amount | Type |
|---------------|---------------|-----------|------------|--------------|-------------|--------|------|
| 1             | 5.52          | n.a.      | 181.700    | 18.336       | 97.98       | n.a.   | BMB  |
| 2             | 6.85          | n.a.      | 3.135      | 0.378        | 2.02        | n.a.   | BMB  |
| <b>Total:</b> |               |           | 184.835    | 18.714       | 100.00      | 0.000  |      |

default/Integration

Chromeleon (c) Dionex 1996-2006  
 Version 6.80 SR5 Build 2413 (137116)

Operator:dell Timebase:U-3000 Sequence:xx

Page 1-1  
 2012-12-20 9:30 上午

|                    |                 |
|--------------------|-----------------|
| <b>217 xx-5-30</b> |                 |
| AD-H-95-5-0.8-230  |                 |
| Sample Name:       | xx-5-30         |
| Vial Number:       | 351             |
| Sample Type:       | unknown         |
| Control Program:   | test            |
| Quantif. Method:   | test            |
| Recording Time:    | 2012-12-20 9:21 |
| Run Time (min):    | 7.94            |
| Injection Volume:  | 20.0            |
| Channel:           | UV_VIS_1        |
| Wavelength:        | 214             |
| Bandwidth:         | n.a.            |
| Dilution Factor:   | 1.0000          |
| Sample Weight:     | 1.0000          |
| Sample Amount:     | 1.0000          |

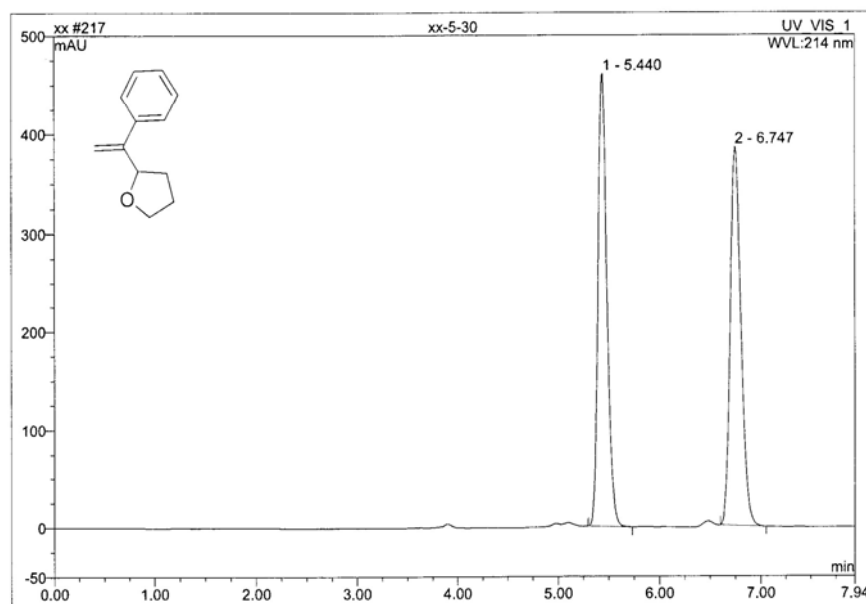

| No.           | Ret.Time min | Peak Name | Height mAU | Area mAU*min | Rel.Area % | Amount | Type |
|---------------|--------------|-----------|------------|--------------|------------|--------|------|
| 1             | 5.44         | n.a.      | 460.444    | 47.093       | 49.94      | n.a.   | BMB  |
| 2             | 6.75         | n.a.      | 385.432    | 47.208       | 50.06      | n.a.   | BMB  |
| <b>Total:</b> |              |           | 845.876    | 94.301       | 100.00     | 0.000  |      |

default/Integration

Chromeleon (c) Dionex 1996-2006  
 Version 6.80 SR5 Build 2413 (137116)

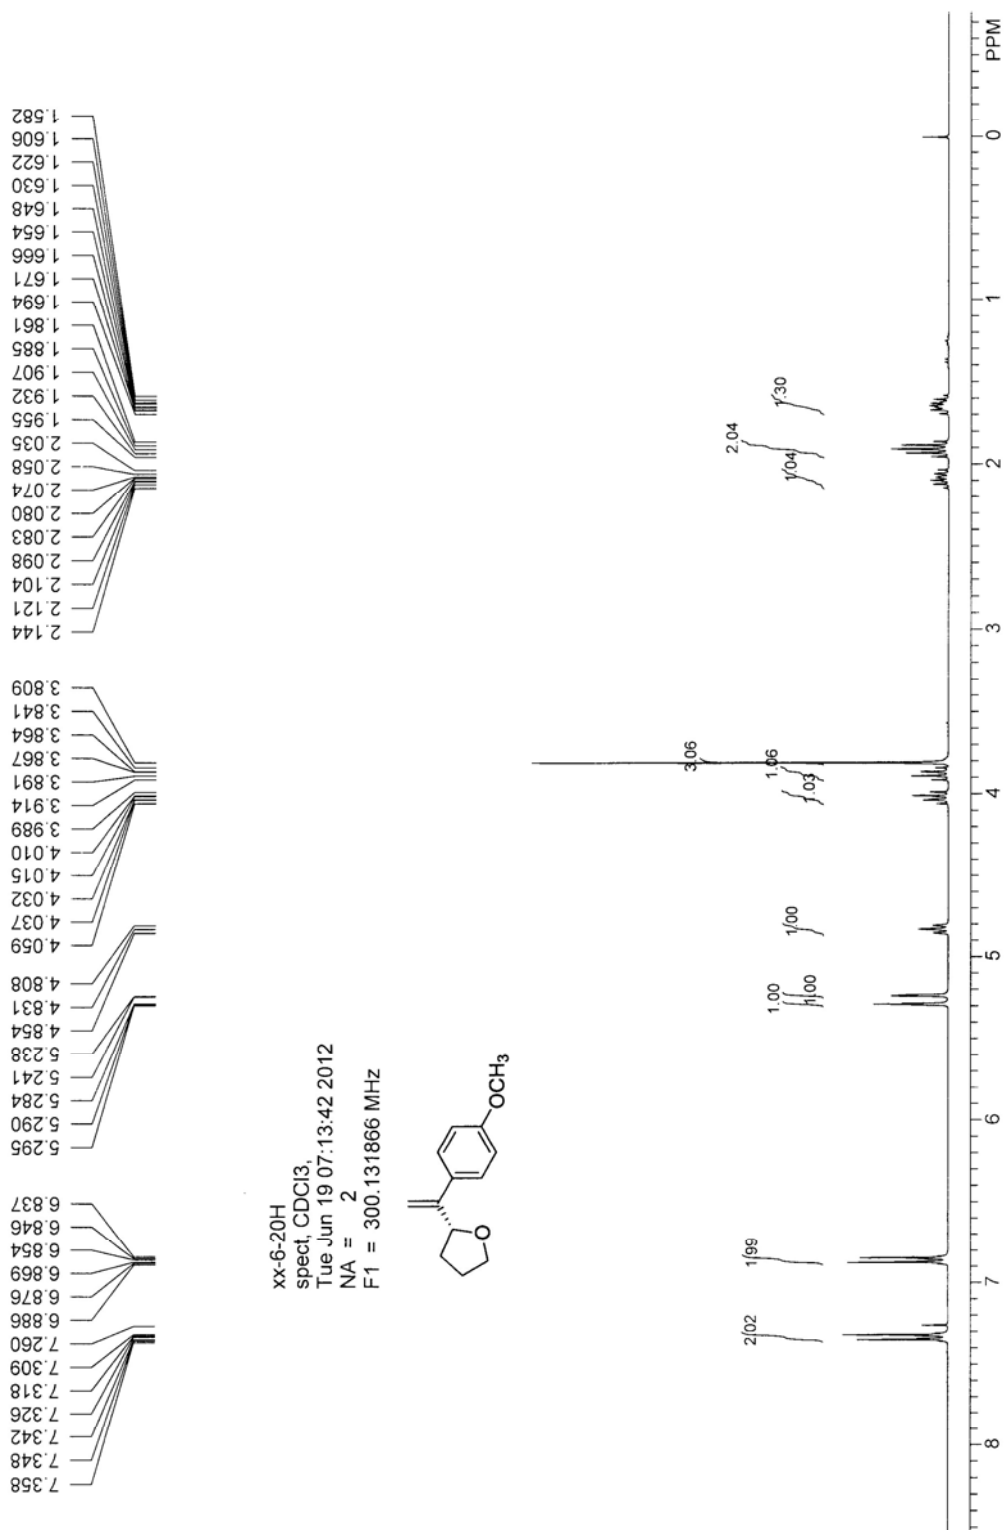

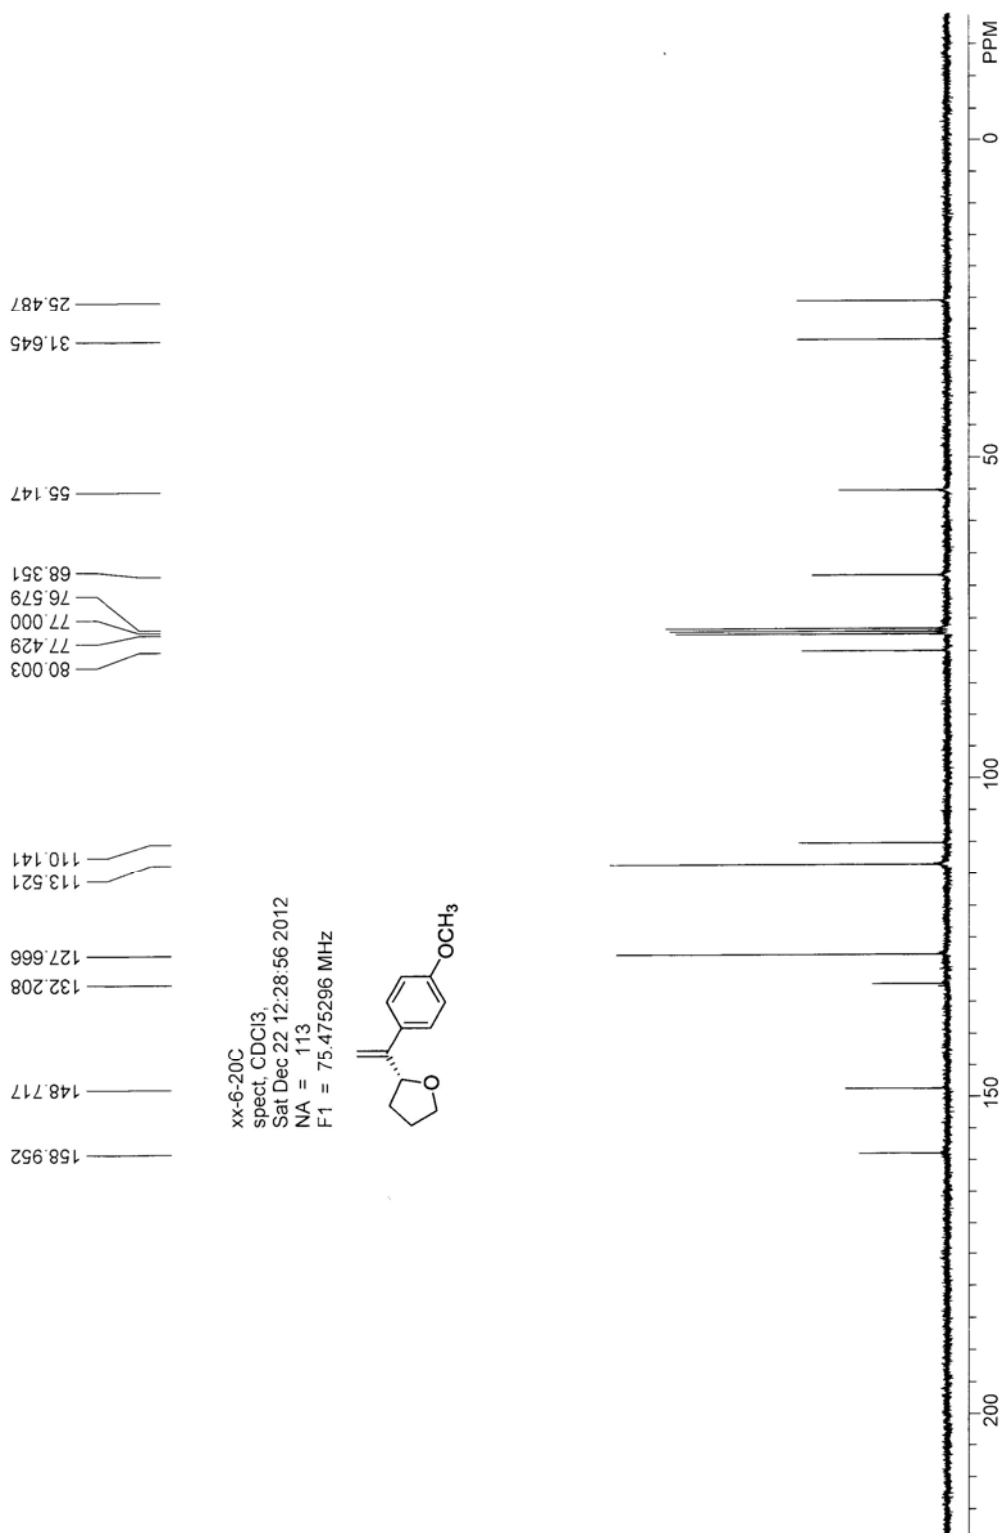

Operator:dell Timebase:U-3000 Sequence:xx

Page 1-1  
 2012-6-19 8:41 上午

| 148 xx-6-20       |                 |                   |          |
|-------------------|-----------------|-------------------|----------|
| AD-H-95-5-0.5-230 |                 |                   |          |
| Sample Name:      | xx-6-20         | Injection Volume: | 20.0     |
| Vial Number:      | 282             | Channel:          | UV_VIS_1 |
| Sample Type:      | unknown         | Wavelength:       | 230      |
| Control Program:  | test            | Bandwidth:        | n.a.     |
| Quantif. Method:  | test            | Dilution Factor:  | 1.0000   |
| Recording Time:   | 2012-6-18 23:28 | Sample Weight:    | 1.0000   |
| Run Time (min):   | 15.41           | Sample Amount:    | 1.0000   |

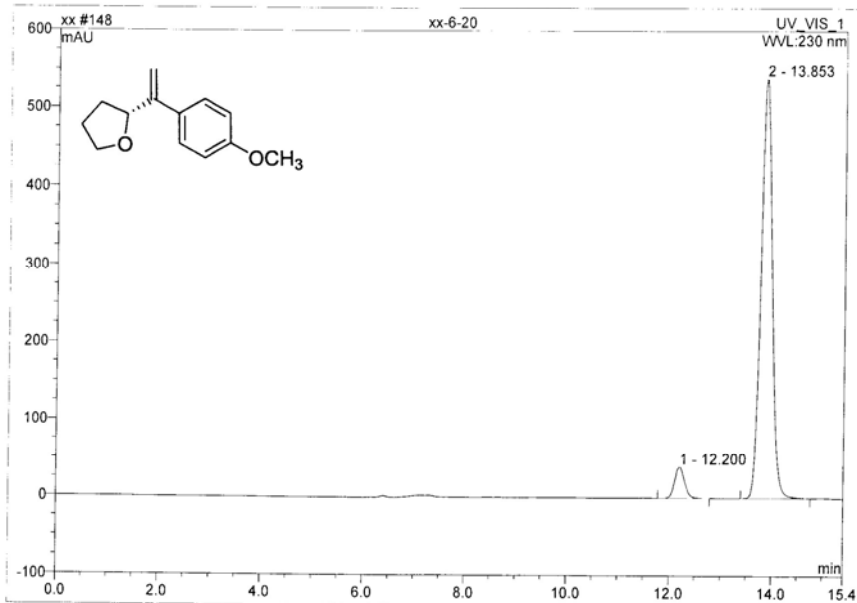

| No.           | Ret.Time min | Peak Name | Height mAU | Area mAU*min | Rel.Area % | Amount | Type |
|---------------|--------------|-----------|------------|--------------|------------|--------|------|
| 1             | 12.20        | n.a.      | 40.454     | 9.025        | 6.20       | n.a.   | BMB  |
| 2             | 13.85        | n.a.      | 539.533    | 136.533      | 93.80      | n.a.   | BMB  |
| <b>Total:</b> |              |           | 579.987    | 145.558      | 100.00     | 0.000  |      |

default/Integration

Chromeleon (c) Dionex 1996-2006  
 Version 6.80 SR5 Build 2413 (137116)

Operator: dell Timebase: U-3000 Sequence: xx

Page 1-1  
 2012-6-19 8:40 上午

| 149 xx-5-170      |                 |                         |
|-------------------|-----------------|-------------------------|
| AD-H-95-5-0.5-230 |                 |                         |
| Sample Name:      | xx-5-170        | Injection Volume: 20.0  |
| Vial Number:      | 283             | Channel: UV_VIS_1       |
| Sample Type:      | unknown         | Wavelength: 230         |
| Control Program:  | test            | Bandwidth: n.a.         |
| Quantif. Method:  | test            | Dilution Factor: 1.0000 |
| Recording Time:   | 2012-6-18 23:44 | Sample Weight: 1.0000   |
| Run Time (min):   | 30.66           | Sample Amount: 1.0000   |

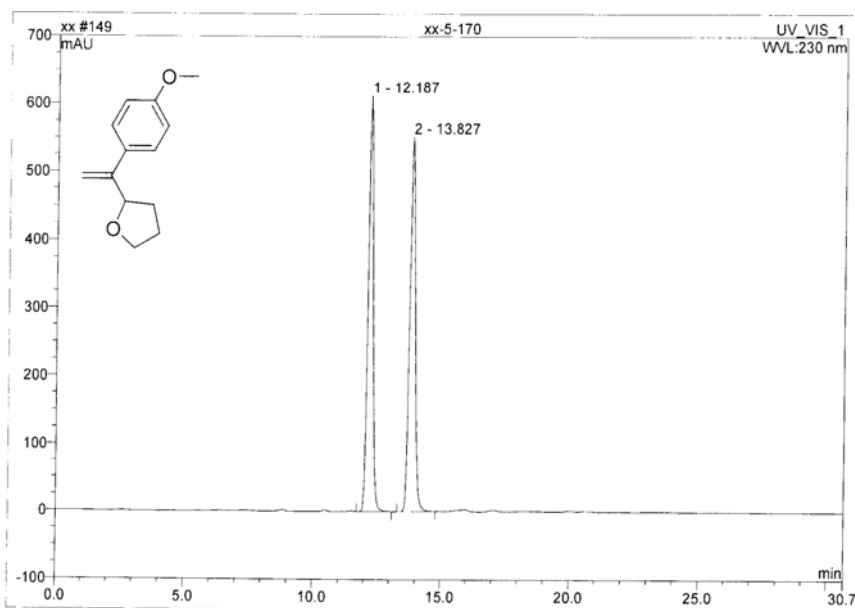

| No.           | Ret. Time<br>min | Peak Name | Height<br>mAU | Area<br>mAU*min | Rel. Area<br>% | Amount | Type |
|---------------|------------------|-----------|---------------|-----------------|----------------|--------|------|
| 1             | 12.19            | n.a.      | 613.214       | 139.691         | 49.80          | n.a.   | BMB  |
| 2             | 13.83            | n.a.      | 552.193       | 140.787         | 50.20          | n.a.   | BMB  |
| <b>Total:</b> |                  |           | 1165.407      | 280.478         | 100.00         | 0.000  |      |

default/Integration

Chromeleon (c) Dionex 1996-2006  
 Version 6.80 SR5 Build 2413 (137116)

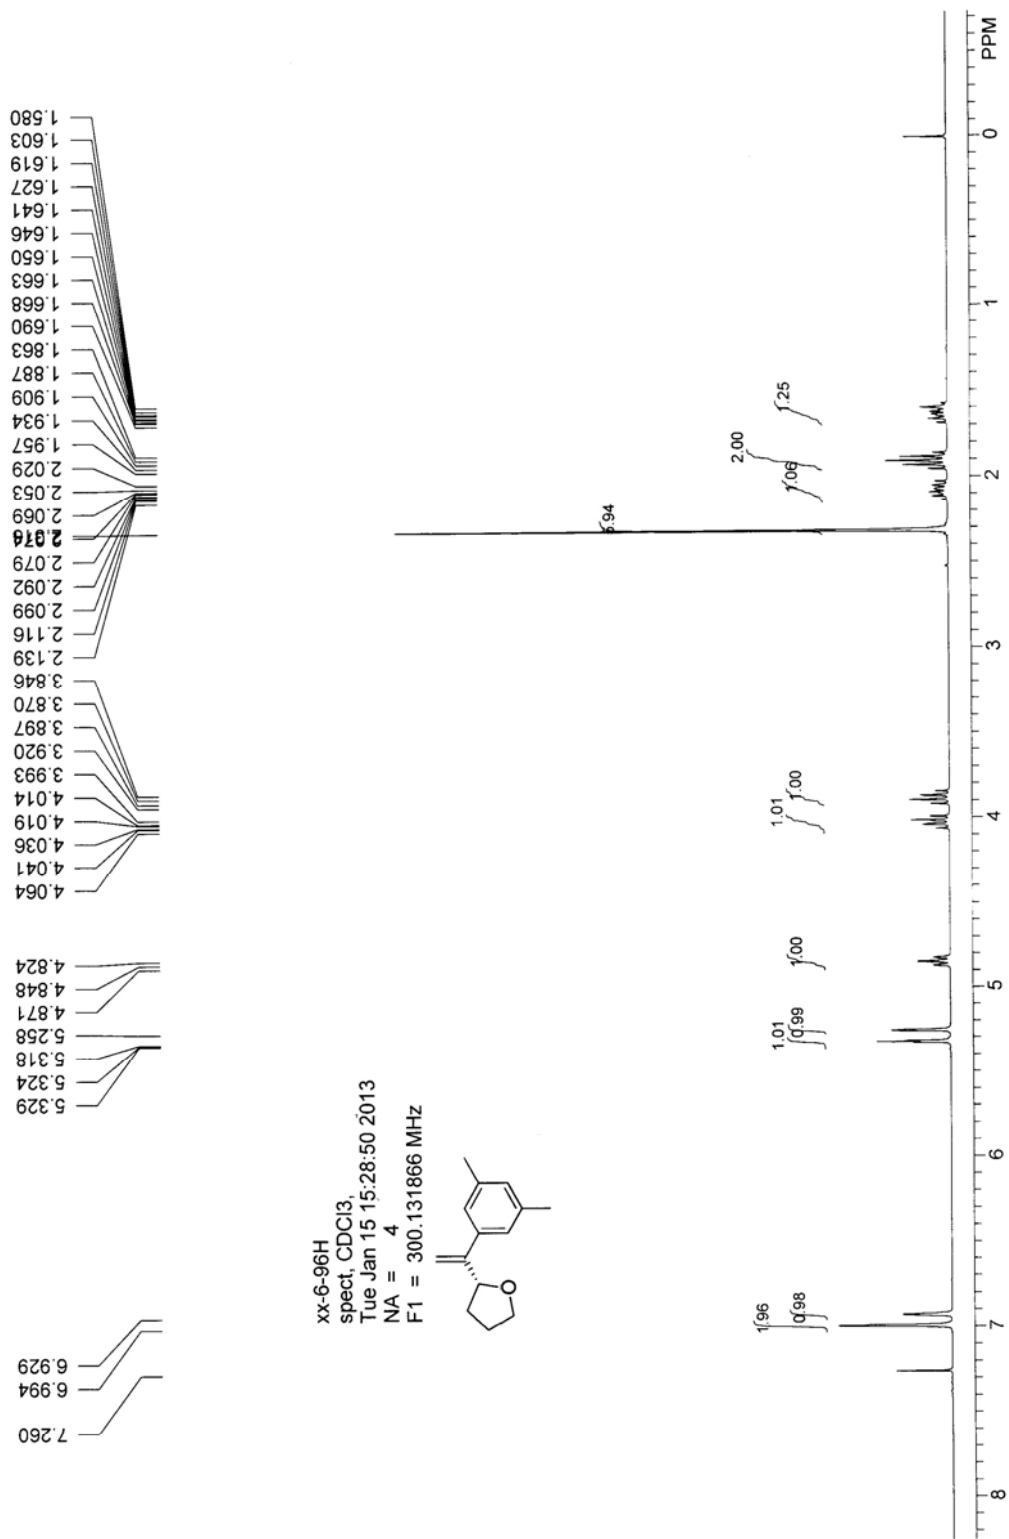



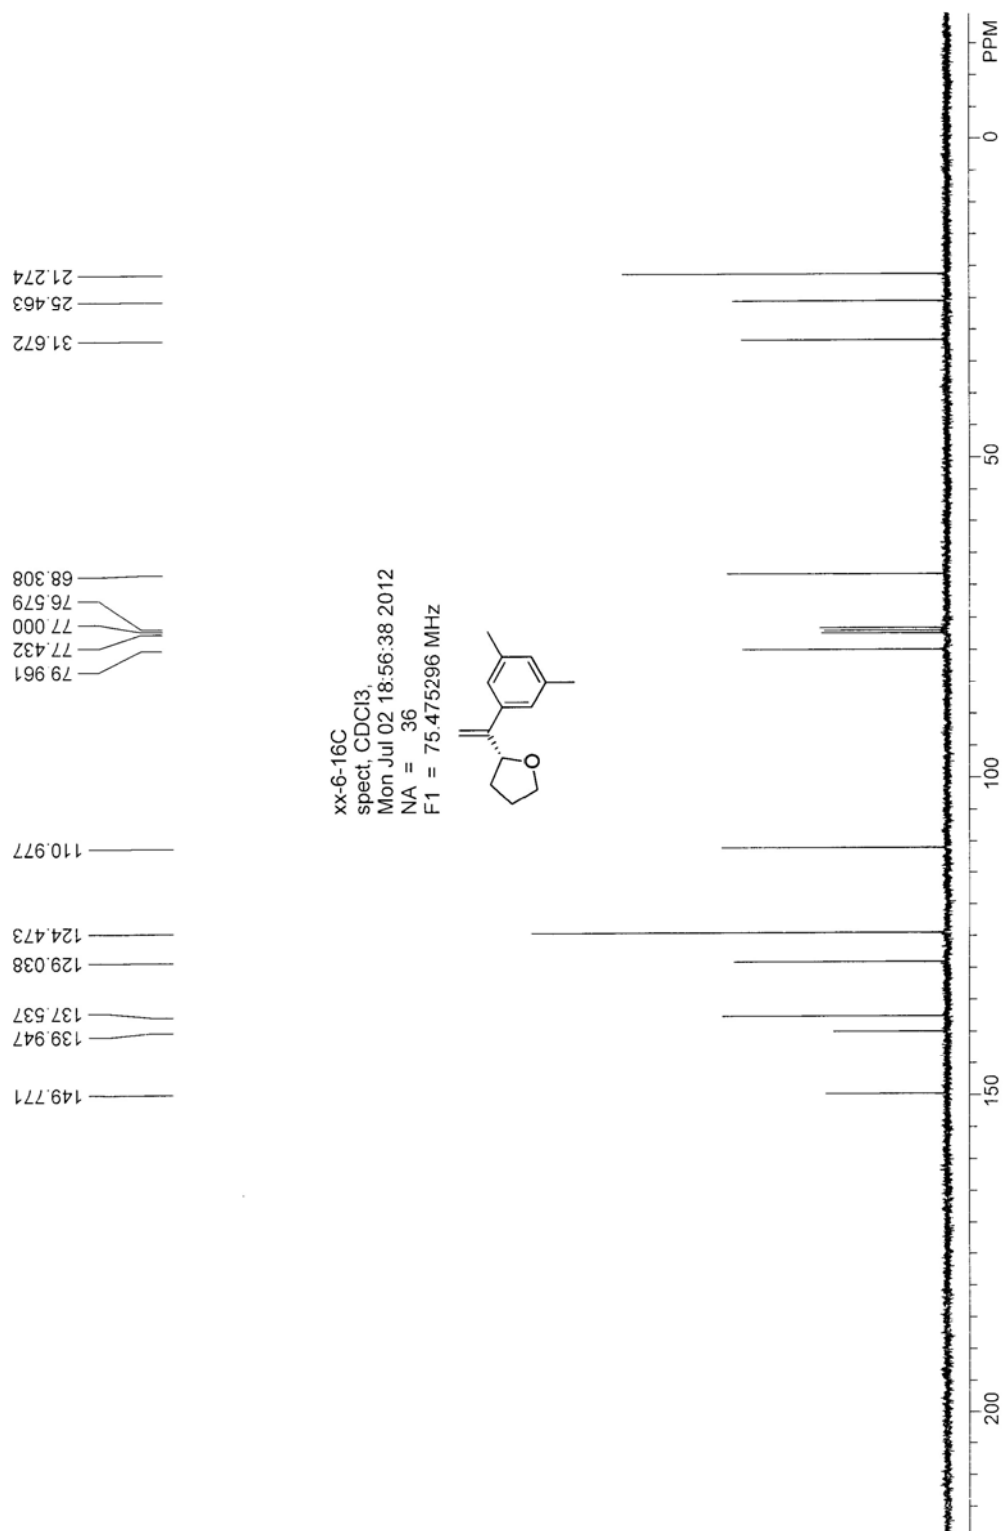

Operator:dell Timebase:U-3000 Sequence:xx

Page 1-1  
 2013-1-15 10:22 上午

|                    |                 |                   |          |
|--------------------|-----------------|-------------------|----------|
| <b>240 xx-6-96</b> |                 |                   |          |
| AD-H-95-5-0.5-230  |                 |                   |          |
| Sample Name:       | xx-6-96         | Injection Volume: | 20.0     |
| Vial Number:       | 374             | Channel:          | UV_VIS_1 |
| Sample Type:       | unknown         | Wavelength:       | 230      |
| Control Program:   | test            | Bandwidth:        | n.a.     |
| Quantif. Method:   | test            | Dilution Factor:  | 1.0000   |
| Recording Time:    | 2013-1-14 21:00 | Sample Weight:    | 1.0000   |
| Run Time (min):    | 10.53           | Sample Amount:    | 1.0000   |

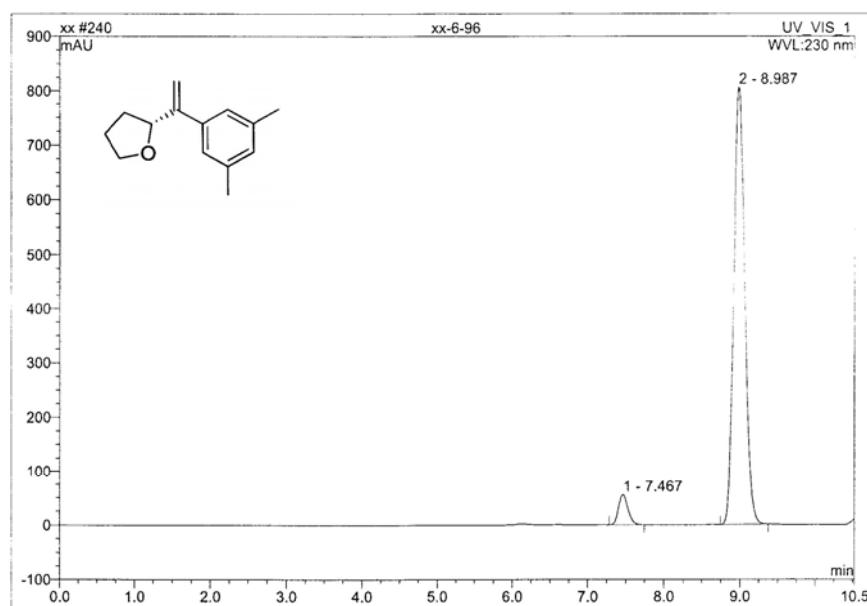

| No.           | Ret.Time<br>min | Peak Name | Height<br>mAU | Area<br>mAU*min | Rel.Area<br>% | Amount | Type |
|---------------|-----------------|-----------|---------------|-----------------|---------------|--------|------|
| 1             | 7.47            | n.a.      | 55.294        | 7.821           | 5.49          | n.a.   | BMB  |
| 2             | 8.99            | n.a.      | 806.216       | 134.644         | 94.51         | n.a.   | BMB  |
| <b>Total:</b> |                 |           | 861.510       | 142.465         | 100.00        | 0.000  |      |

default/Integration

Chromeleon (c) Dionex 1996-2006  
 Version 6.80 SR5 Build 2413 (137116)

Operator:dell Timebase:U-3000 Sequence:xx

Page 1-1  
 2013-1-15 10:23 上午

|                    |                 |                   |          |
|--------------------|-----------------|-------------------|----------|
| <b>242 xx-6-13</b> |                 |                   |          |
| AD-H-95-5-0.5-230  |                 |                   |          |
| Sample Name:       | xx-6-13         | Injection Volume: | 20.0     |
| Vial Number:       | 376             | Channel:          | UV_VIS_1 |
| Sample Type:       | unknown         | Wavelength:       | 230      |
| Control Program:   | test            | Bandwidth:        | n.a.     |
| Quantif. Method:   | test            | Dilution Factor:  | 1.0000   |
| Recording Time:    | 2013-1-14 21:26 | Sample Weight:    | 1.0000   |
| Run Time (min):    | 11.29           | Sample Amount:    | 1.0000   |

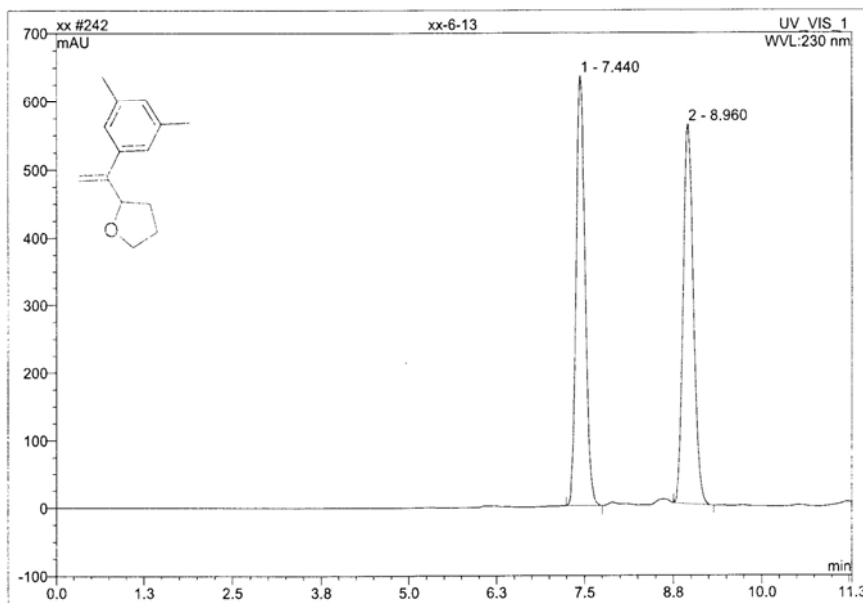

| No.           | Ret.Time<br>min | Peak Name | Height<br>mAU | Area<br>mAU*min | Rel.Area<br>% | Amount | Type |
|---------------|-----------------|-----------|---------------|-----------------|---------------|--------|------|
| 1             | 7.44            | n.a.      | 635.382       | 92.898          | 49.51         | n.a.   | BMB  |
| 2             | 8.96            | n.a.      | 561.231       | 94.738          | 50.49         | n.a.   | BMB  |
| <b>Total:</b> |                 |           | 1196.614      | 187.636         | 100.00        | 0.000  |      |

default/Integration

Chromeleon (c) Dionex 1996-2006  
 Version 6.80 SR5 Build 2413 (137116)

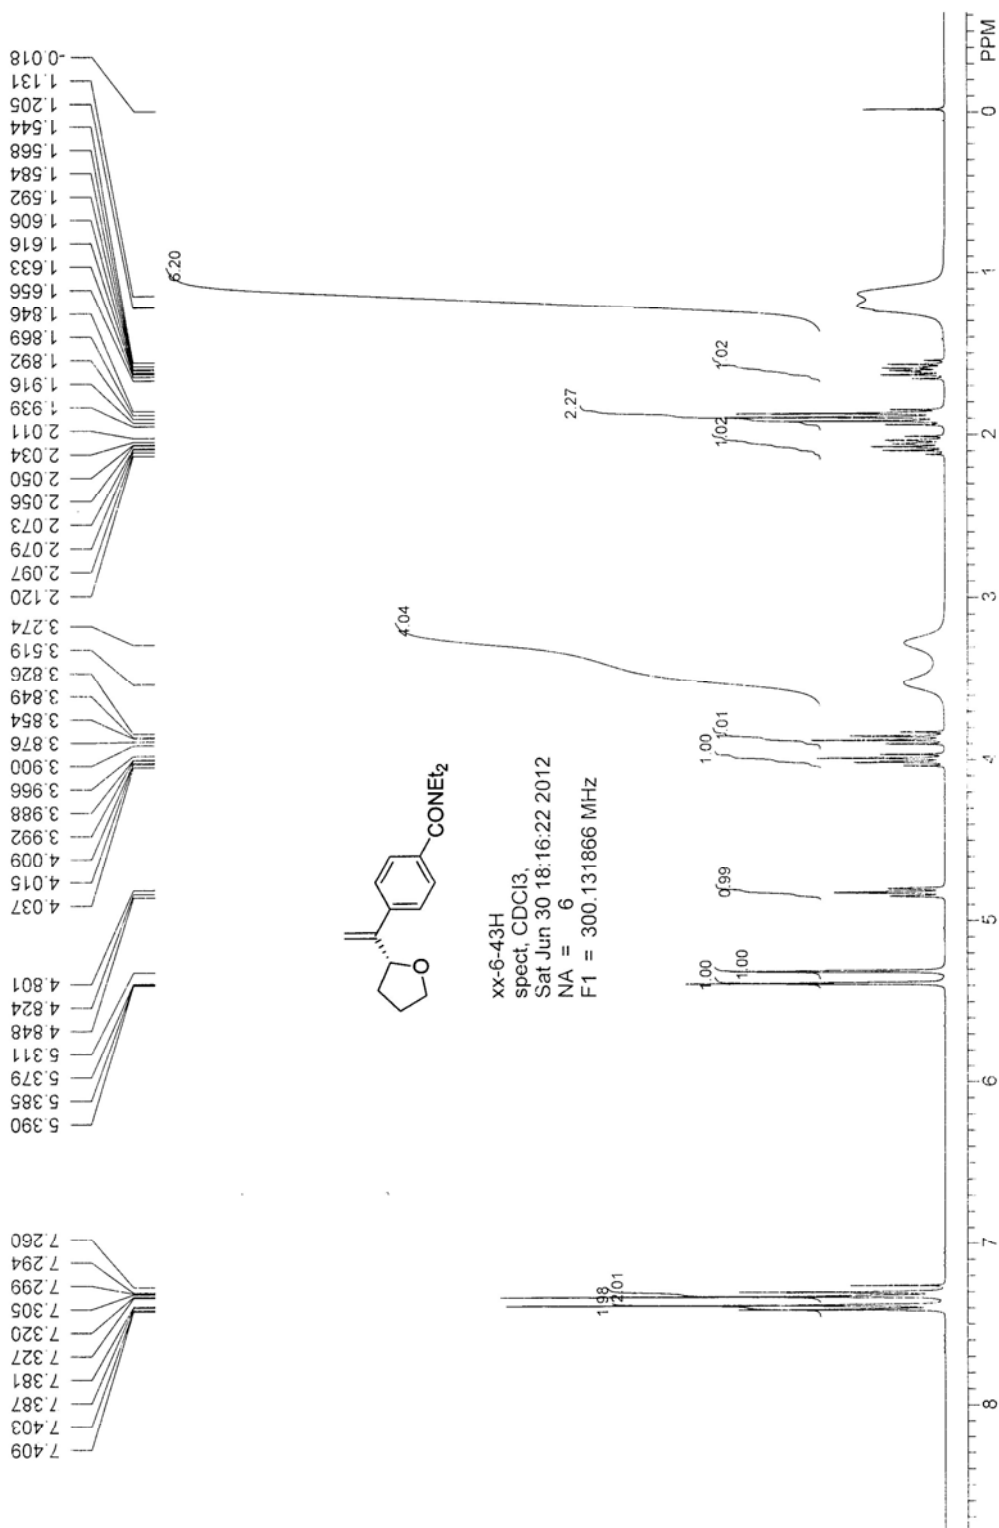

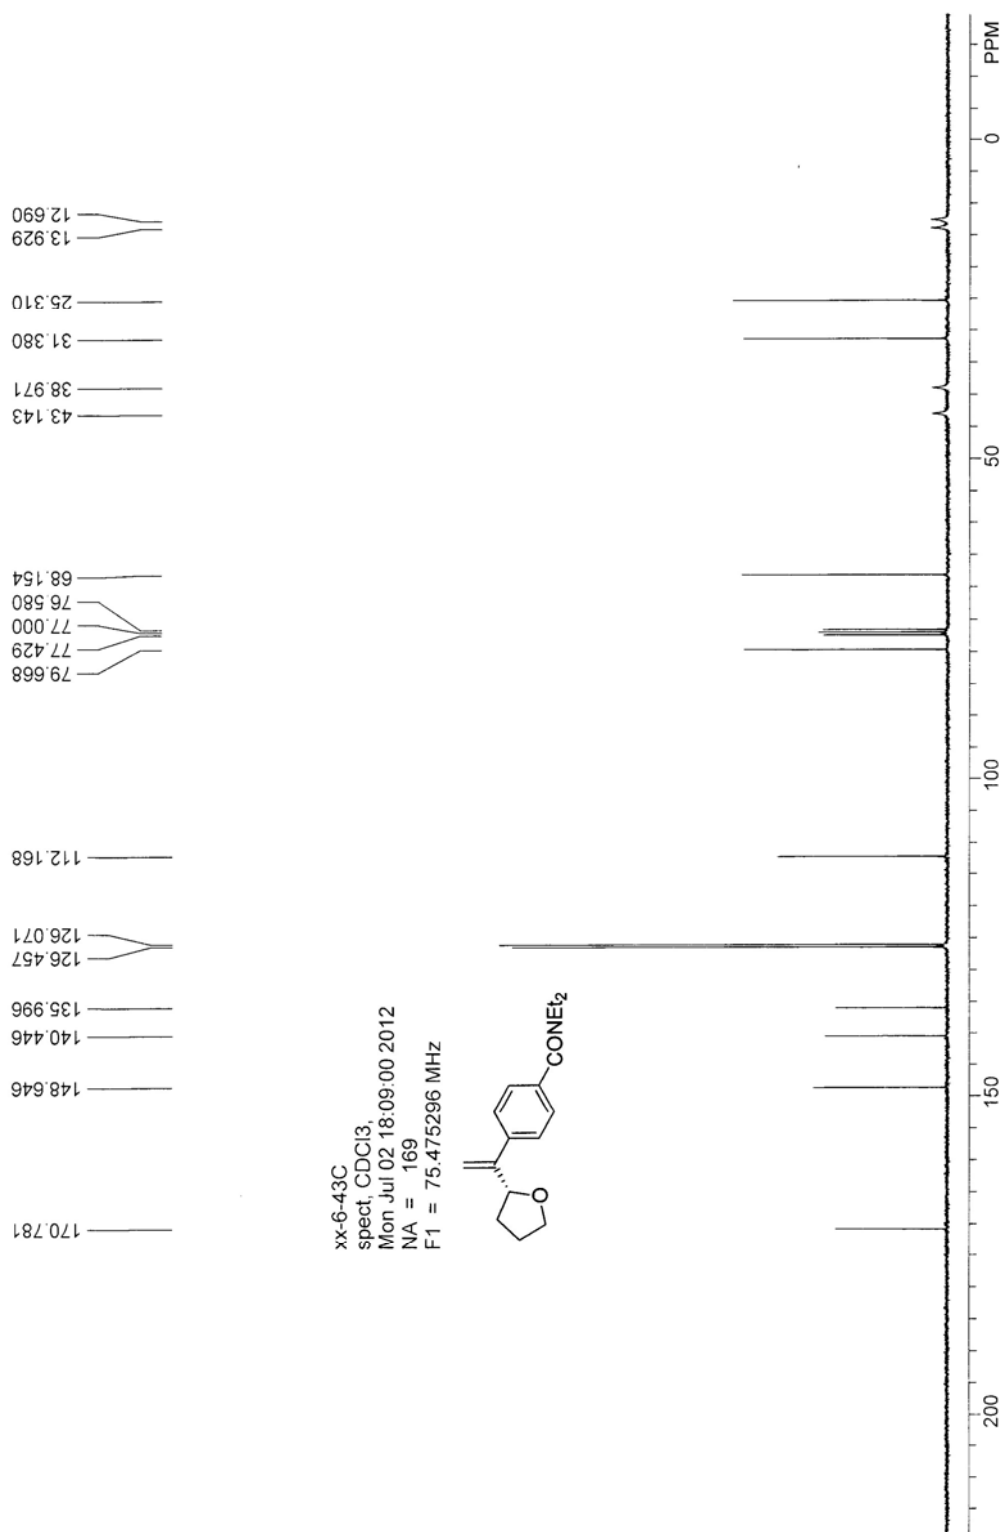

Operator:dell Timebase:U-3000 Sequence:xx

Page 1-1  
 2012-7-1 8:46 下午

**185 xx-6-43**

OJ-H-90-10-0.5-230

|                  |                |                   |          |
|------------------|----------------|-------------------|----------|
| Sample Name:     | xx-6-43        | Injection Volume: | 20.0     |
| Vial Number:     | 319            | Channel:          | UV_VIS_1 |
| Sample Type:     | unknown        | Wavelength:       | 230      |
| Control Program: | test           | Bandwidth:        | n.a.     |
| Quantif. Method: | test           | Dilution Factor:  | 1.0000   |
| Recording Time:  | 2012-7-1 19:07 | Sample Weight:    | 1.0000   |
| Run Time (min):  | 16.99          | Sample Amount:    | 1.0000   |

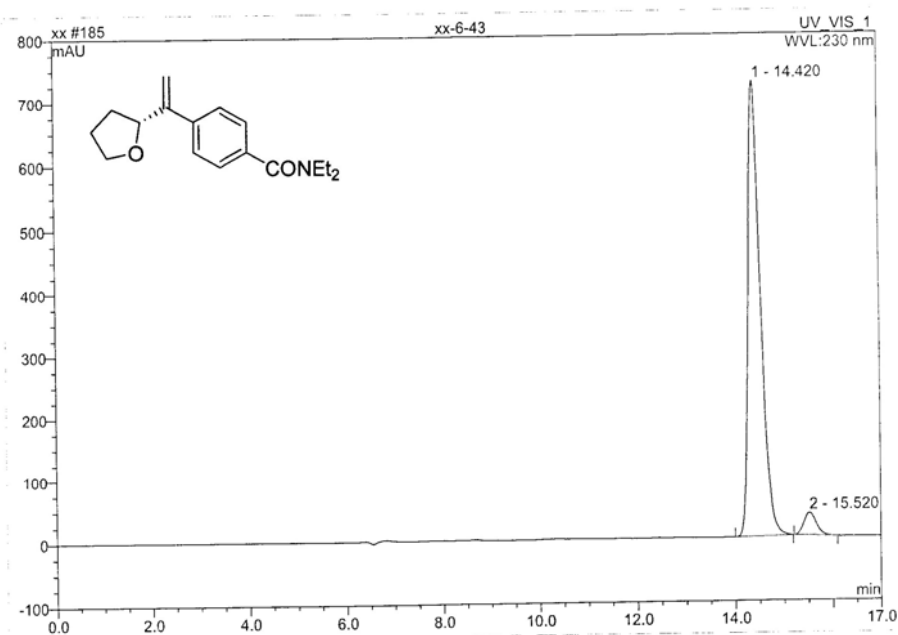

| No.           | Ret. Time<br>min | Peak Name | Height<br>mAU | Area<br>mAU*min | Rel. Area<br>% | Amount | Type |
|---------------|------------------|-----------|---------------|-----------------|----------------|--------|------|
| 1             | 14.42            | n.a.      | 723.462       | 211.462         | 95.24          | n.a.   | BMB  |
| 2             | 15.52            | n.a.      | 35.527        | 10.557          | 4.76           | n.a.   | BMB  |
| <b>Total:</b> |                  |           | 758.989       | 222.019         | 100.00         | 0.000  |      |

default/Integration

Chromeleon (c) Dionex 1996-2006  
 Version 6.80 SR5 Build 2413 (137116)

Operator:dell Timebase:U-3000 Sequence:xx

Page 1-1  
 2012-7-1 8:47 下午

|                    |                |                   |          |
|--------------------|----------------|-------------------|----------|
| <b>186 xx-6-42</b> |                |                   |          |
| OJ-H-90-10-0.5-230 |                |                   |          |
| Sample Name:       | xx-6-42        | Injection Volume: | 20.0     |
| Vial Number:       | 320            | Channel:          | UV_VIS_1 |
| Sample Type:       | unknown        | Wavelength:       | 230      |
| Control Program:   | test           | Bandwidth:        | n.a.     |
| Quantif. Method:   | test           | Dilution Factor:  | 1.0000   |
| Recording Time:    | 2012-7-1 19:24 | Sample Weight:    | 1.0000   |
| Run Time (min):    | 18.19          | Sample Amount:    | 1.0000   |

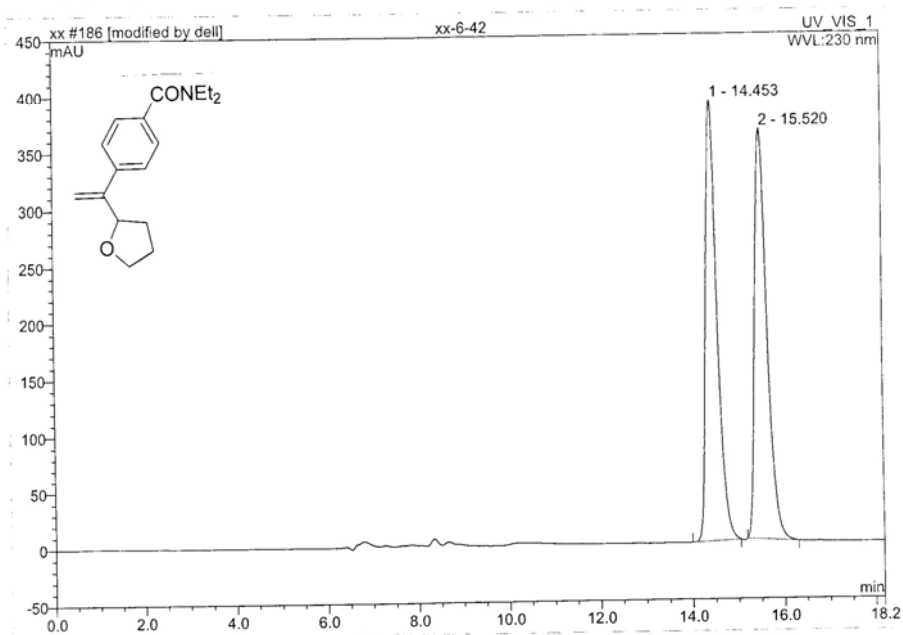

| No.           | Ret.Time<br>min | Peak Name | Height<br>mAU | Area<br>mAU*min | Rel.Area<br>% | Amount | Type |
|---------------|-----------------|-----------|---------------|-----------------|---------------|--------|------|
| 1             | 14.45           | n.a.      | 389.630       | 112.154         | 50.12         | n.a.   | BMB* |
| 2             | 15.52           | n.a.      | 362.201       | 111.598         | 49.88         | n.a.   | BMB* |
| <b>Total:</b> |                 |           | 751.831       | 223.752         | 100.00        | 0.000  |      |

default/Integration

Chromeleon (c) Dionex 1996-2006  
 Version 6.80 SR5 Build 2413 (137116)

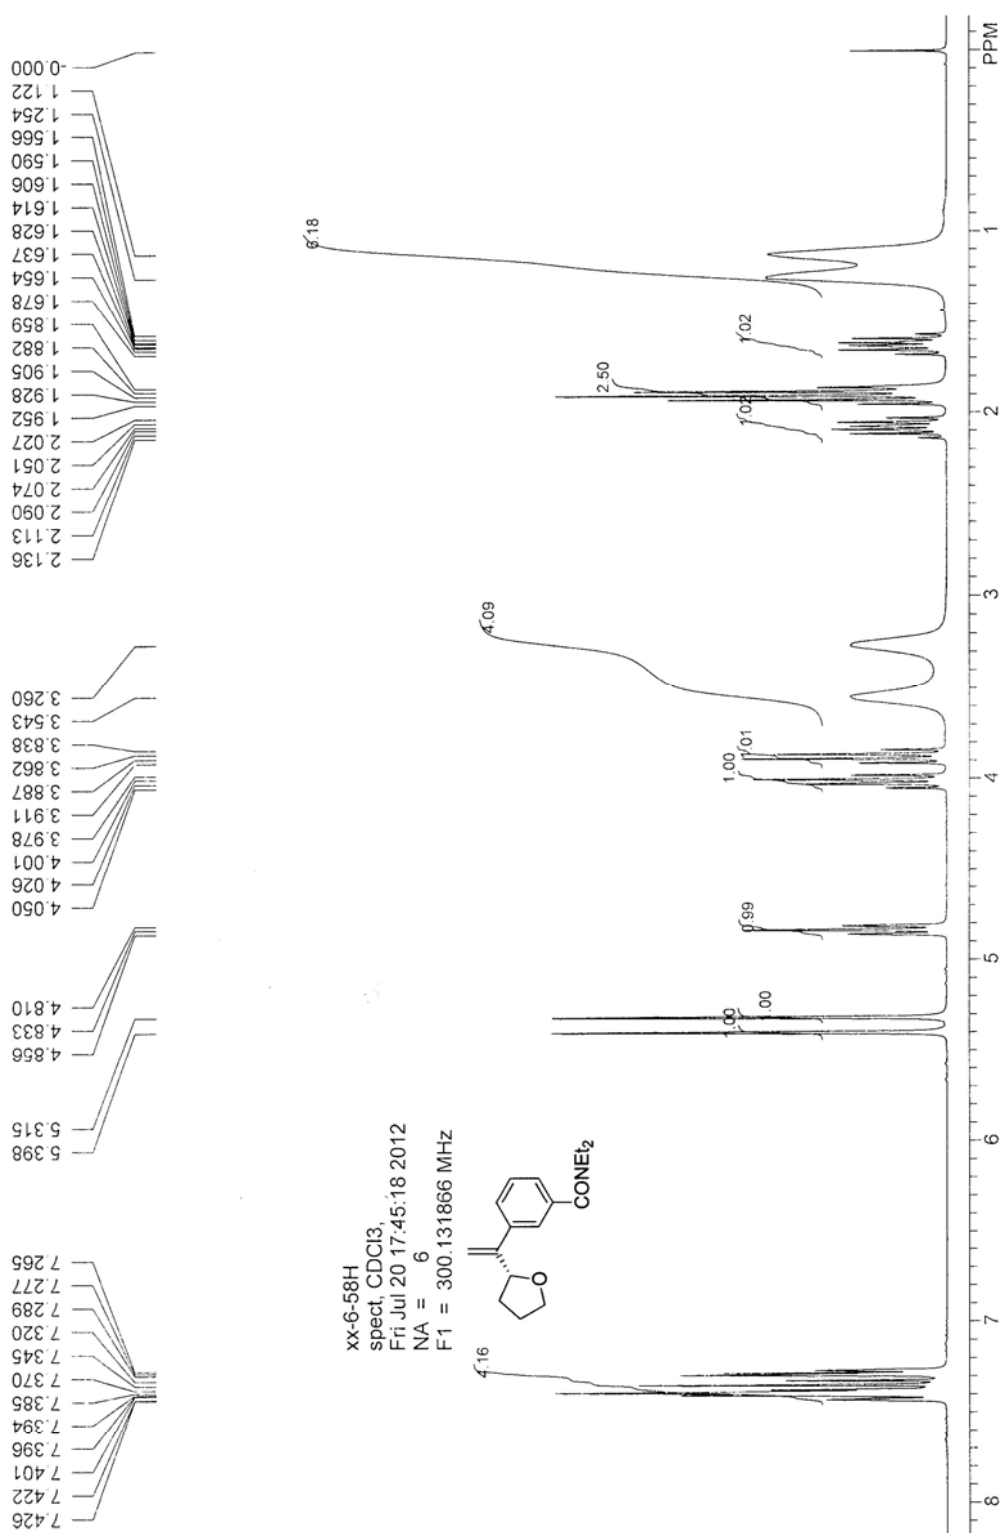



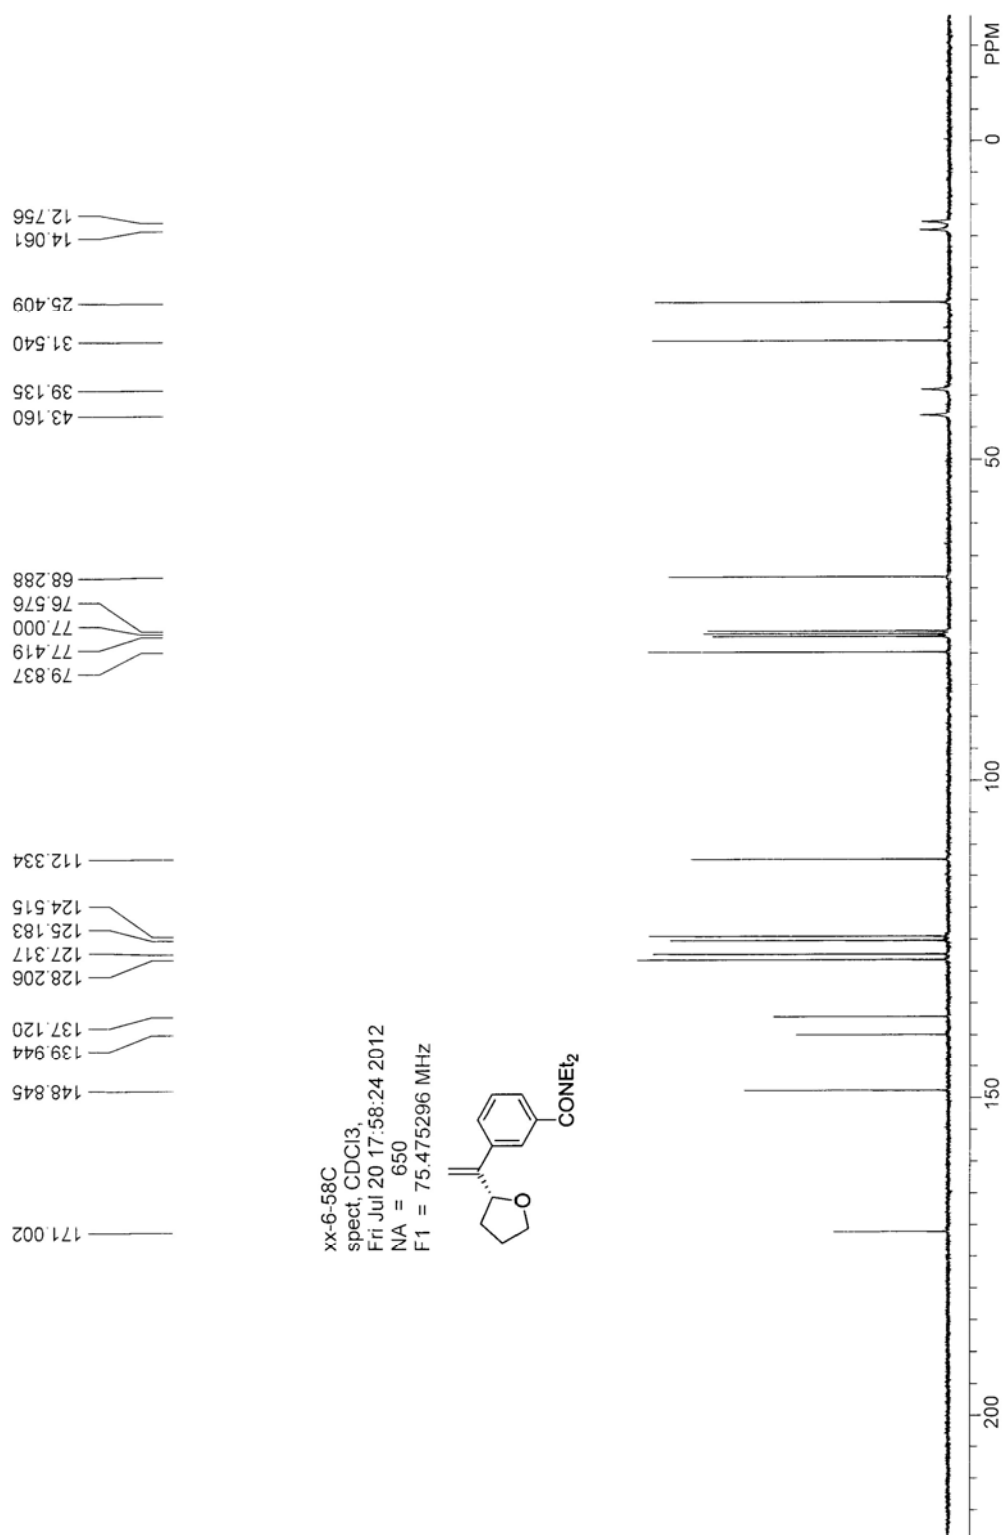

## xx-6-58-od-h-95-5-1-214

实验时间: 2012/7/17, 13:18:23

报告时间: 2012/7/17, 15:07:55

谱图文件: D:\zhuguangjiong\20120717\xx-6-58-od-95-5-1-214.org

实验内容简介:

od-h 95/5

1ml/min 214nm

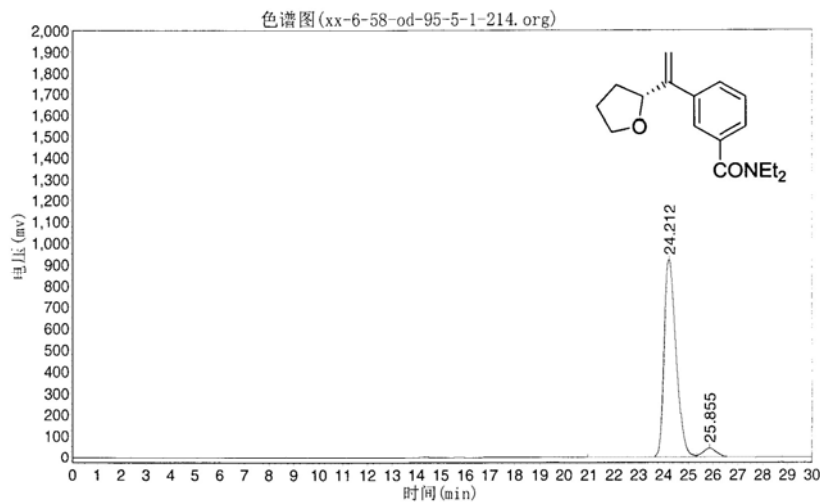

分析结果表

| 峰号 | 峰名 | 保留时间   | 峰高         | 峰面积          | 含量       |
|----|----|--------|------------|--------------|----------|
| 1  |    | 24.212 | 919309.313 | 30821372.000 | 95.4200  |
| 2  |    | 25.855 | 40718.965  | 1479367.375  | 4.5800   |
| 总计 |    |        | 960028.277 | 32300739.375 | 100.0000 |

## xx-6-52-od-h-95-5-1-214

实验时间: 2012/7/17, 12:32:03

报告时间: 2012/7/17, 15:06:39

谱图文件: D:\zhuguangji\ong\xx\20120717\xx-6-52-od-95-5-1-214.org

实验内容简介:

od-h 95/5

1ml/min 214nm

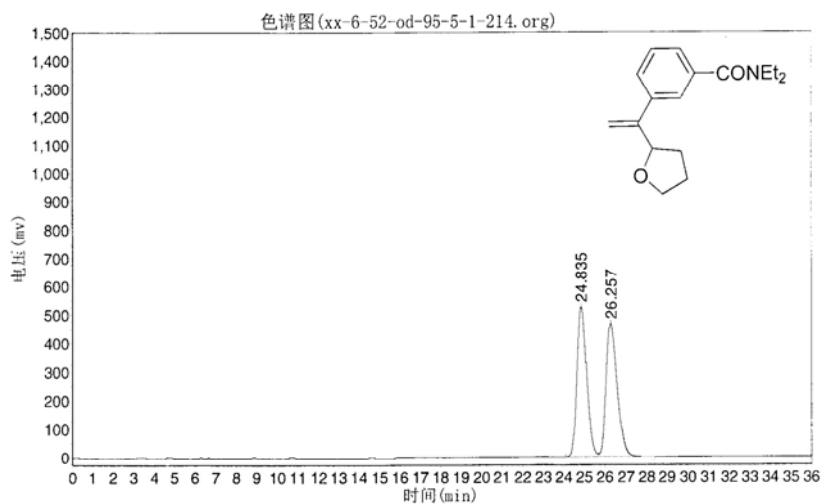

分析结果表

| 峰号 | 峰名 | 保留时间   | 峰高         | 峰面积          | 含量       |
|----|----|--------|------------|--------------|----------|
| 1  |    | 24.835 | 528172.000 | 17470038.000 | 49.9039  |
| 2  |    | 26.257 | 466627.875 | 17537294.000 | 50.0961  |
| 总计 |    |        | 994799.875 | 35007332.000 | 100.0000 |

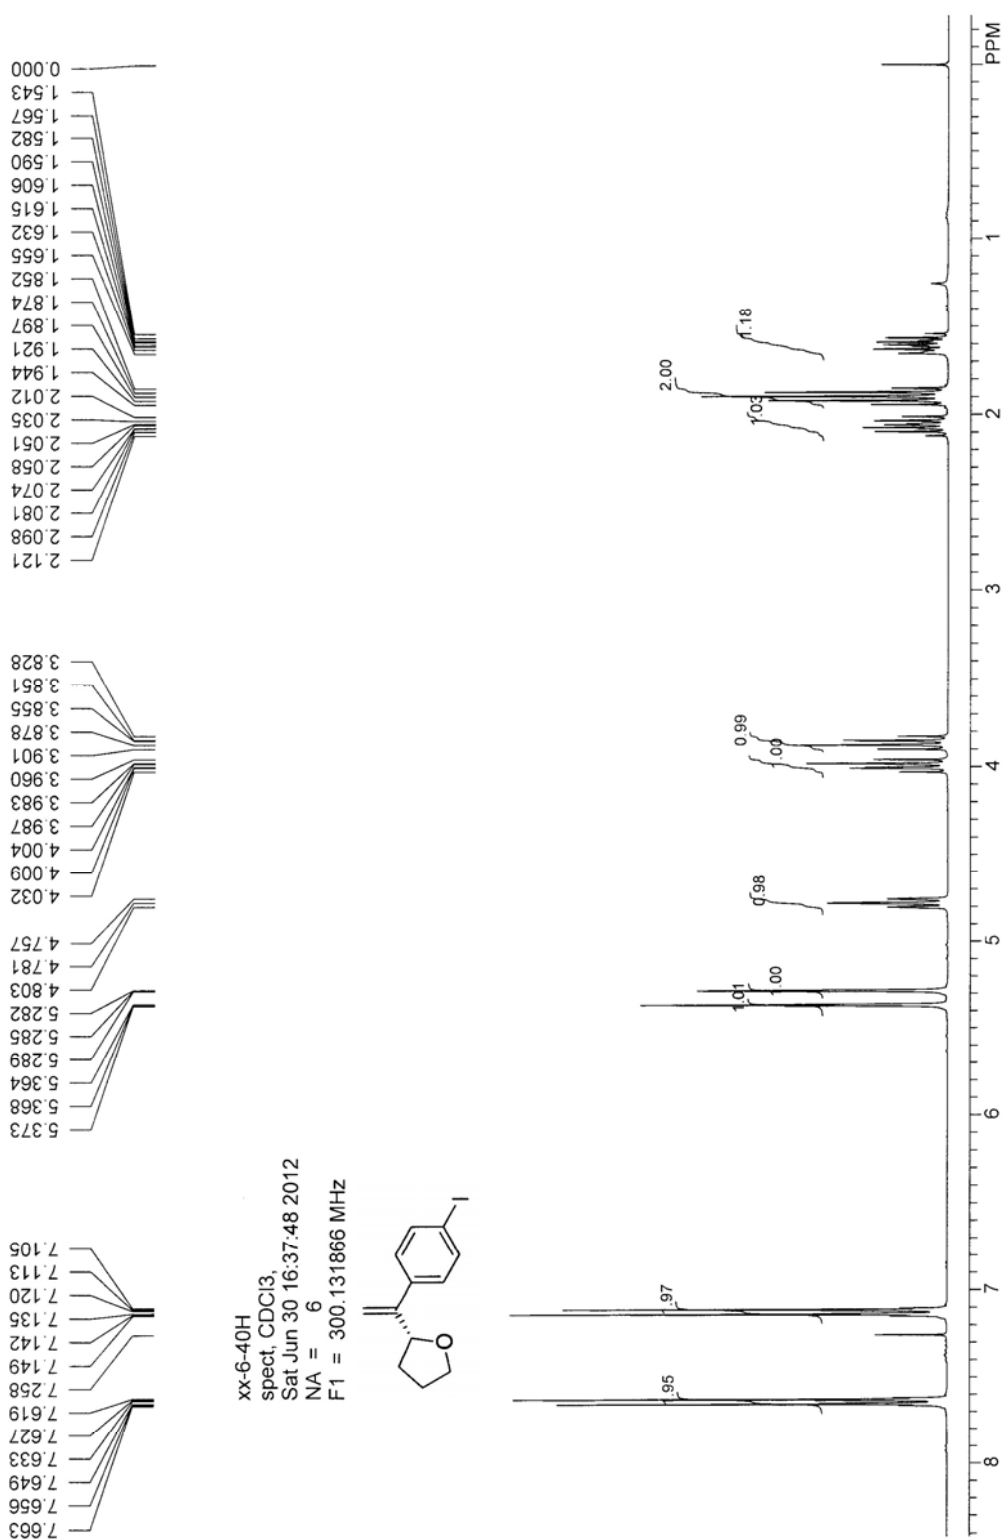

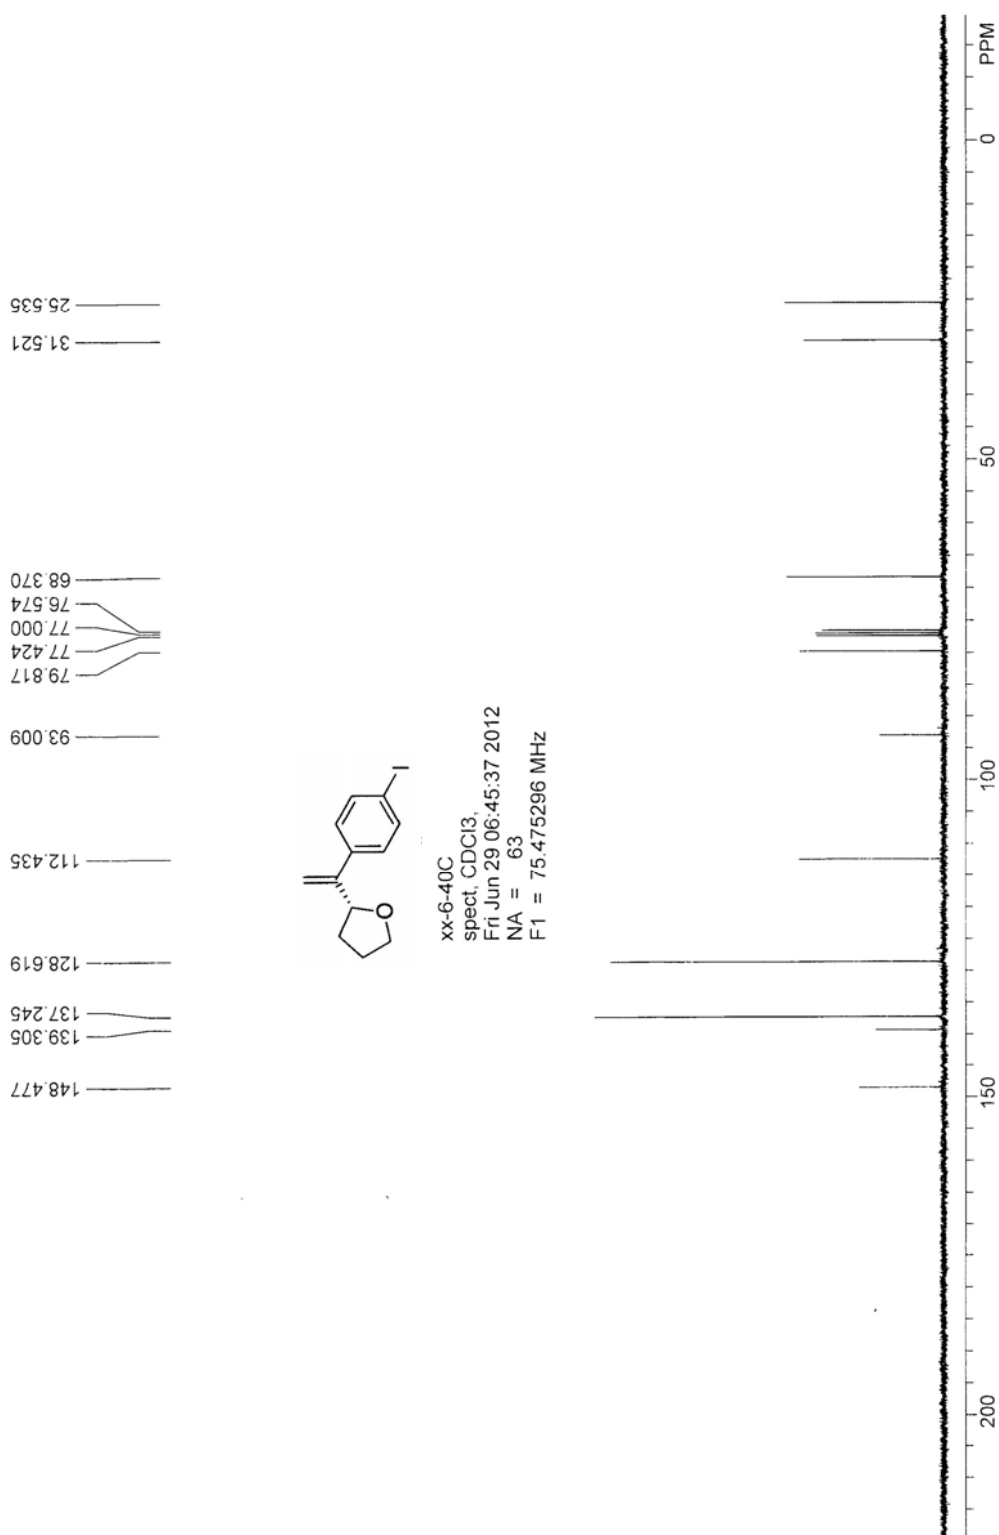

Operator:dell Timebase:U-3000 Sequence:xx

Page 1-1  
 2012-6-30 8:02 下午

|                    |                 |                   |          |
|--------------------|-----------------|-------------------|----------|
| <b>176 xx-6-40</b> |                 |                   |          |
| OJ-H-98-2-0.5-230  |                 |                   |          |
| Sample Name:       | xx-6-40         | Injection Volume: | 20.0     |
| Vial Number:       | 310             | Channel:          | UV_VIS_1 |
| Sample Type:       | unknown         | Wavelength:       | 230      |
| Control Program:   | test            | Bandwidth:        | n.a.     |
| Quantif. Method:   | test            | Dilution Factor:  | 1.0000   |
| Recording Time:    | 2012-6-30 19:45 | Sample Weight:    | 1.0000   |
| Run Time (min):    | 16.21           | Sample Amount:    | 1.0000   |

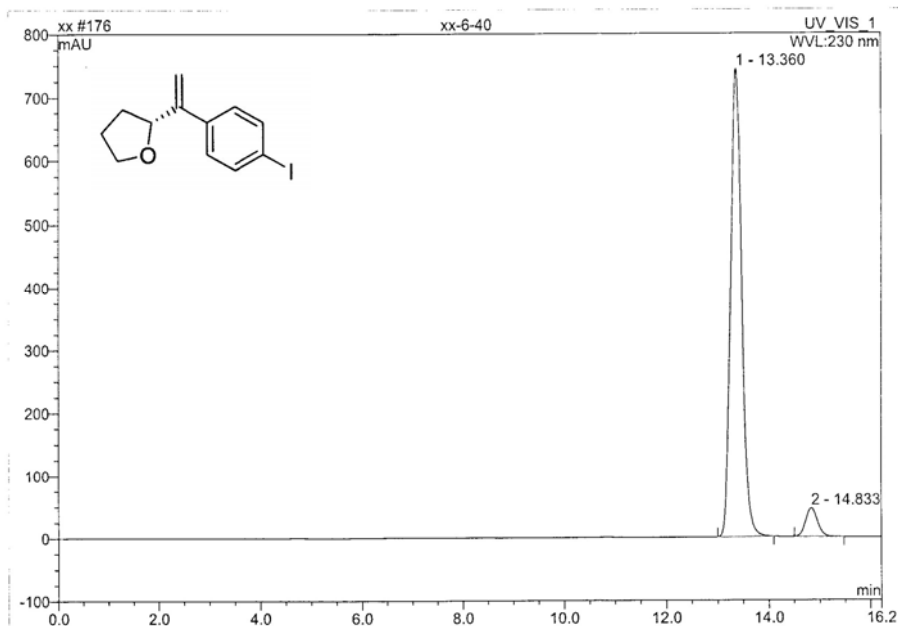

| No.           | Ret.Time<br>min | Peak Name | Height<br>mAU | Area<br>mAU*min | Rel.Area<br>% | Amount | Type |
|---------------|-----------------|-----------|---------------|-----------------|---------------|--------|------|
| 1             | 13.36           | n.a.      | 742.529       | 186.322         | 93.90         | n.a.   | BMB  |
| 2             | 14.83           | n.a.      | 45.100        | 12.098          | 6.10          | n.a.   | BMB  |
| <b>Total:</b> |                 |           | 787.629       | 198.421         | 100.00        | 0.000  |      |

default/Integration

Chromeleon (c) Dionex 1996-2006  
 Version 6.80 SR5 Build 2413 (137116)

Operator:dell Timebase:U-3000 Sequence:xx

Page 1-1  
 2012-6-30 7:58 下午

|                    |                 |                   |          |
|--------------------|-----------------|-------------------|----------|
| <b>175 xx-6-36</b> |                 |                   |          |
| OJ-H-98-2-0.5-230  |                 |                   |          |
| Sample Name:       | xx-6-36         | Injection Volume: | 20.0     |
| Vial Number:       | 309             | Channel:          | UV_VIS_1 |
| Sample Type:       | unknown         | Wavelength:       | 230      |
| Control Program:   | test            | Bandwidth:        | n.a.     |
| Quantif. Method:   | test            | Dilution Factor:  | 1.0000   |
| Recording Time:    | 2012-6-30 19:27 | Sample Weight:    | 1.0000   |
| Run Time (min):    | 17.24           | Sample Amount:    | 1.0000   |

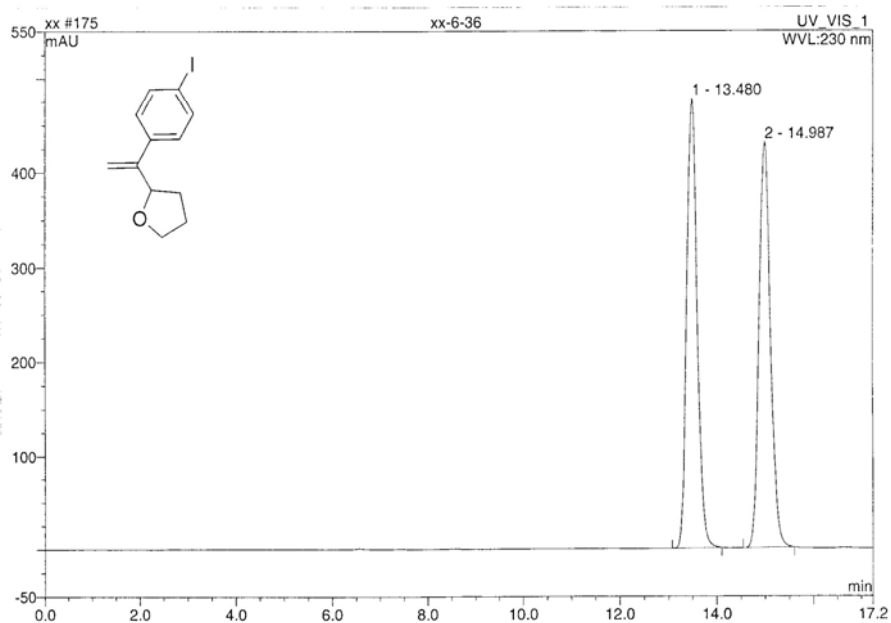

| No.           | Ret.Time<br>min | Peak Name | Height<br>mAU | Area<br>mAU*min | Rel.Area<br>% | Amount | Type |
|---------------|-----------------|-----------|---------------|-----------------|---------------|--------|------|
| 1             | 13.48           | n.a.      | 477.285       | 118.492         | 49.99         | n.a.   | BMB  |
| 2             | 14.99           | n.a.      | 430.028       | 118.542         | 50.01         | n.a.   | BMB  |
| <b>Total:</b> |                 |           | 907.313       | 237.035         | 100.00        | 0.000  |      |

default/Integration

Chromeleon (c) Dionex 1996-2006  
 Version 6.80 SR5 Build 2413 (137116)

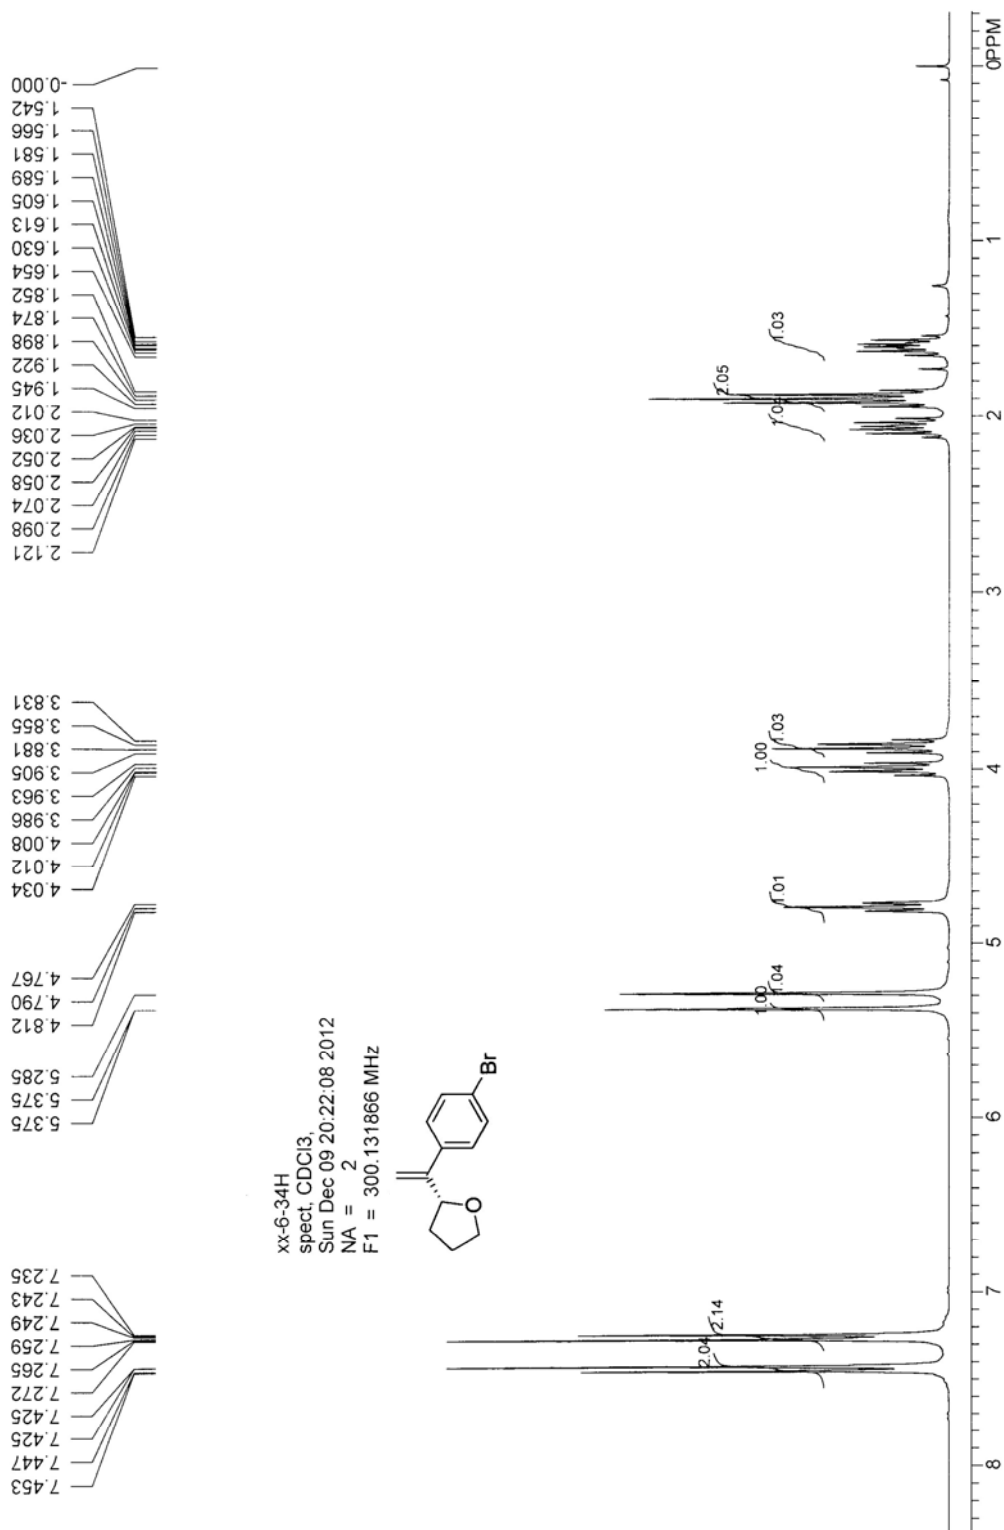



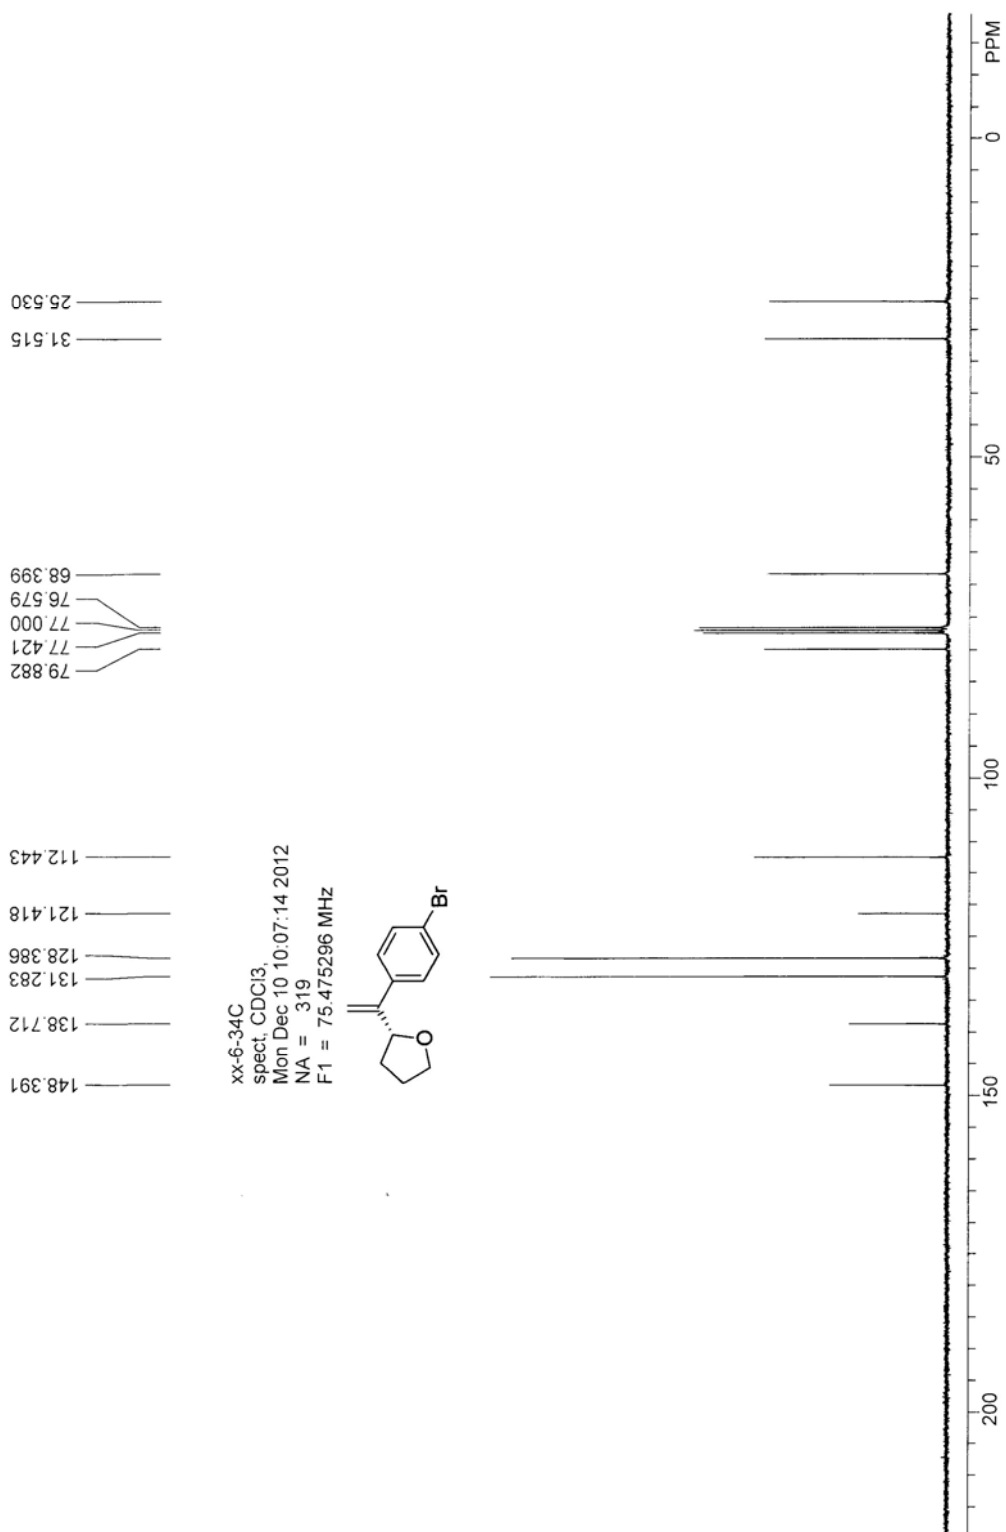

## xx-6-34

实验时间: 2012-06-28, 13:17:07

报告时间: 2012-06-28, 13:20:28

谱图文件: F:\sif\ixi\2012-06-28\XX-6-34\新建文件夹 (2)\XX-6-34-0J-h-98-2-0.6-214.org

实验内容简介:

0J-H 98:2

214nm 0.6ml/min

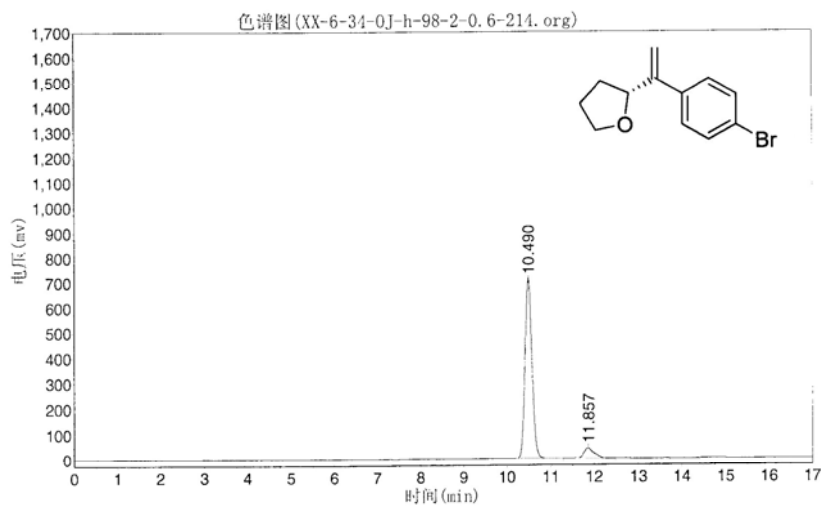

分析结果表

| 峰号 | 峰名 | 保留时间   | 峰高         | 峰面积         | 含量       |
|----|----|--------|------------|-------------|----------|
| 1  |    | 10.490 | 709267.063 | 7867080.500 | 92.4552  |
| 2  |    | 11.857 | 39949.730  | 641992.688  | 7.5448   |
| 总计 |    |        | 749216.793 | 8509073.188 | 100.0000 |

xx-6-35

实验时间: 2012-06-28, 12:26:16

报告时间: 2012-06-28, 12:27:30

谱图文件: F:\s1f\XiXi\2012-06-28\XX-6-35\新建文件夹\XX-6-35-  
OJ-h-98-2-0.6-214.org

实验内容简介:

OJ-H 98:2

214nm 0.6ml/min

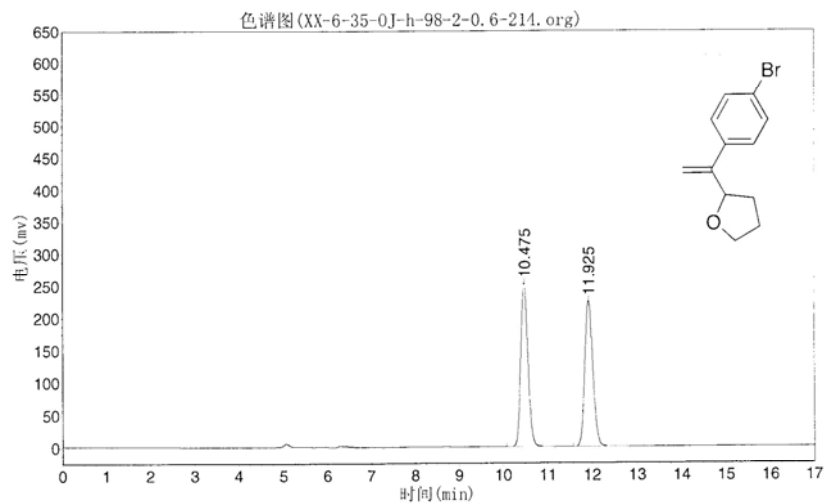

分析结果表

| 峰号 | 峰名 | 保留时间   | 峰高         | 峰面积         | 含量       |
|----|----|--------|------------|-------------|----------|
| 1  |    | 10.475 | 253820.375 | 2833843.000 | 50.0083  |
| 2  |    | 11.925 | 225483.984 | 2832906.000 | 49.9917  |
| 总计 |    |        | 479304.359 | 5666749.000 | 100.0000 |

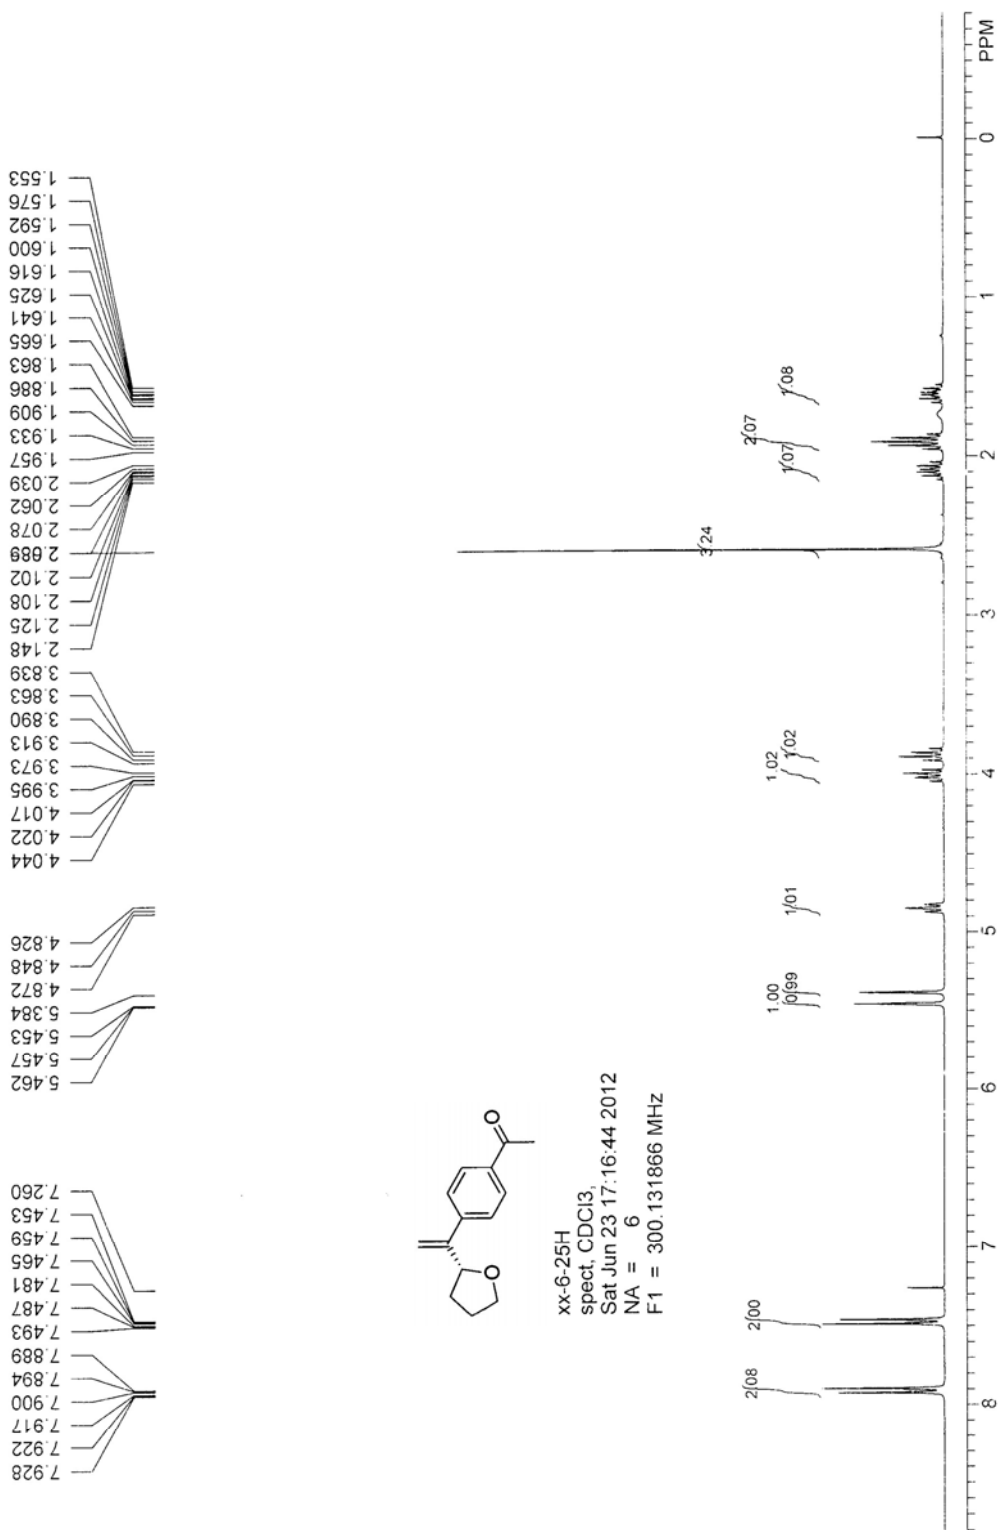

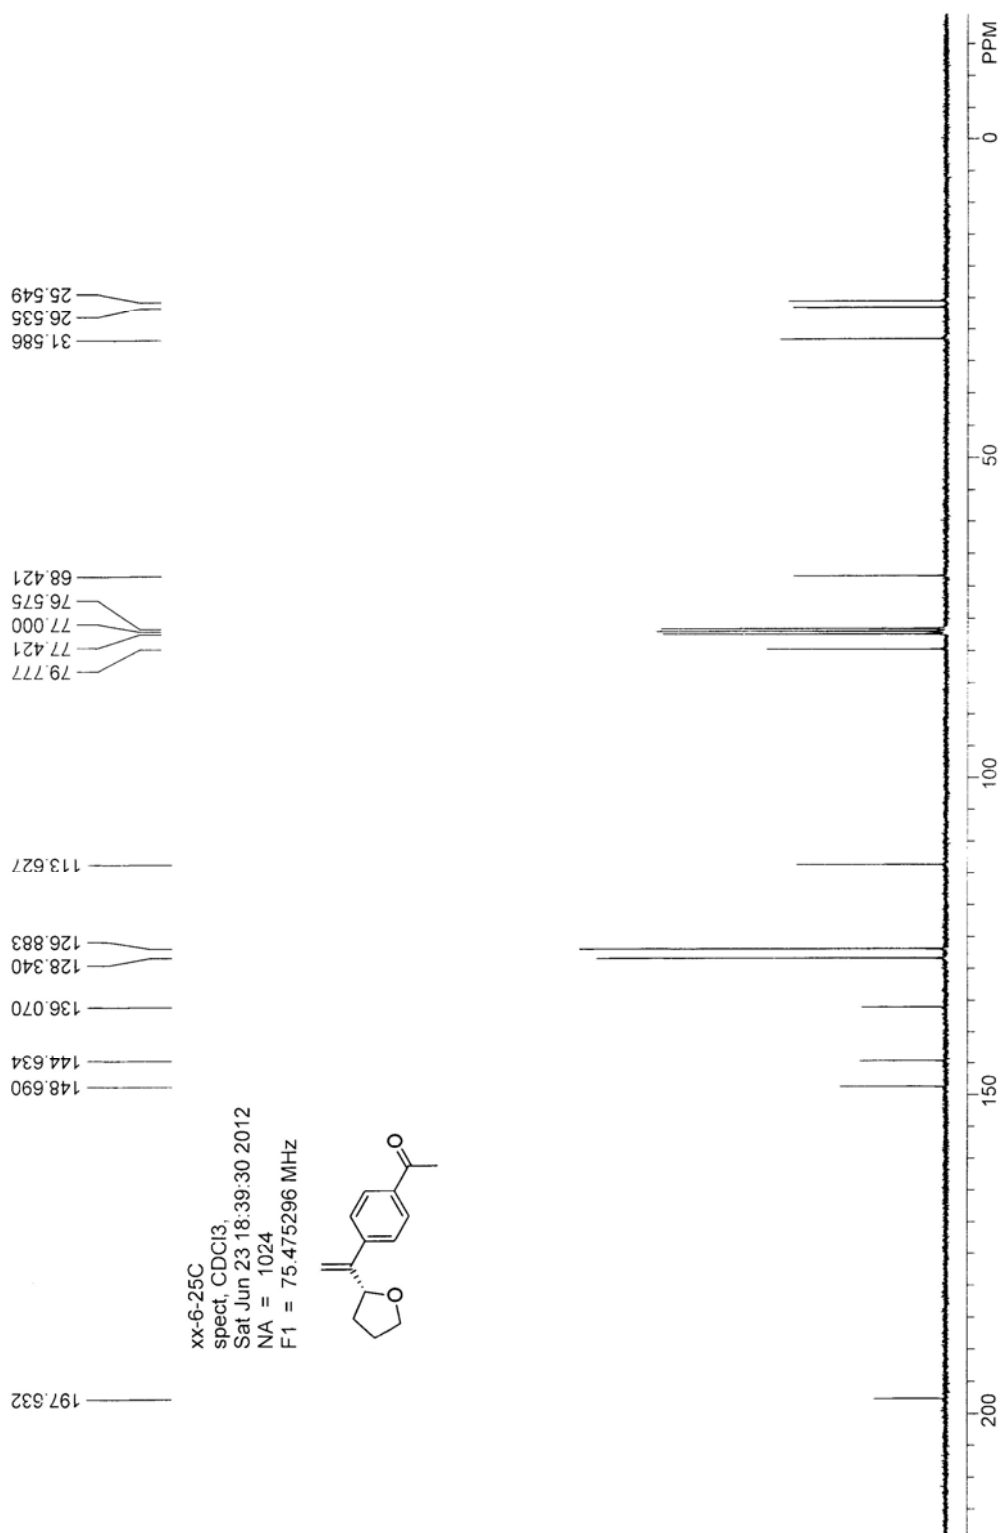

## xx-6-25-as-h-98-2-1-214

实验时间: 2012-06-21, 12:03:52

报告时间: 2012-06-21, 13:07:25

谱图文件: D:\zhuguangji\ong\xx\20120621\xx-6-25-as-h-98-2-1-214..org

实验内容简介:

as-h 98/2

1ml/min 214nm

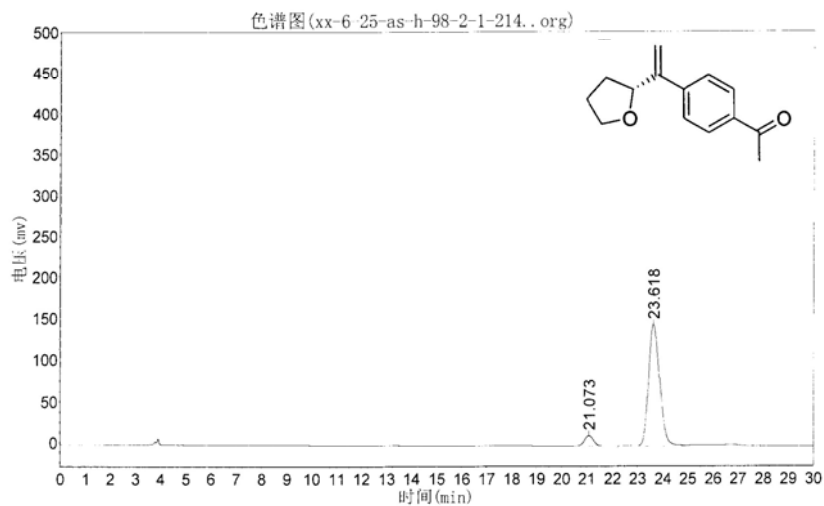

分析结果表

| 峰号 | 峰名 | 保留时间   | 峰高         | 峰面积         | 含量       |
|----|----|--------|------------|-------------|----------|
| 1  |    | 21.073 | 13010.264  | 321259.719  | 6.6044   |
| 2  |    | 23.618 | 146317.547 | 4543070.500 | 93.3956  |
| 总计 |    |        | 159327.811 | 4864330.219 | 100.0000 |

## xx-5-152-as-h-98-2-1-214

实验时间: 2012-06-21, 10:39:02

报告时间: 2012-06-21, 12:50:58

谱图文件: D:\zhuguangjiong\xx\20120621\xx-5-152-as-h-98-2-1-214.org

实验内容简介:

as-h 98/2

1ml/min 214nm

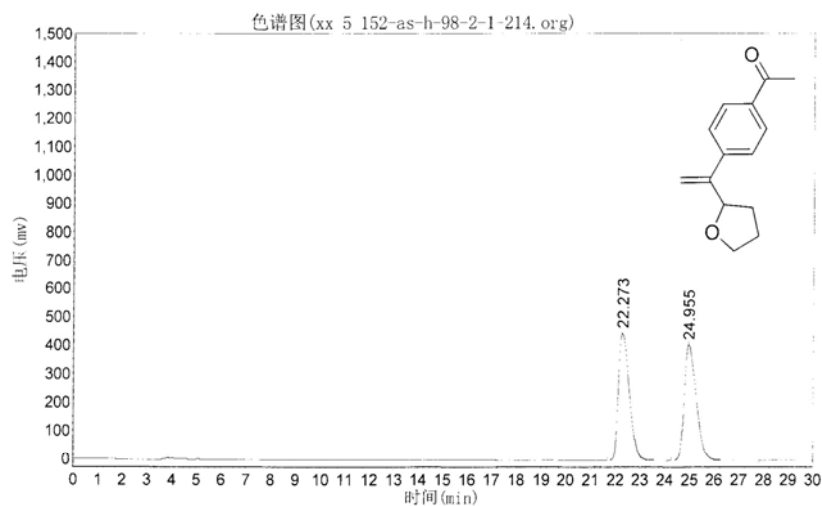

分析结果表

| 峰号 | 峰名 | 保留时间   | 峰高         | 峰面积          | 含量       |
|----|----|--------|------------|--------------|----------|
| 1  |    | 22.273 | 446157.281 | 13546459.000 | 50.0151  |
| 2  |    | 24.955 | 405394.844 | 13538300.000 | 49.9849  |
| 总计 |    |        | 851552.125 | 27084759.000 | 100.0000 |

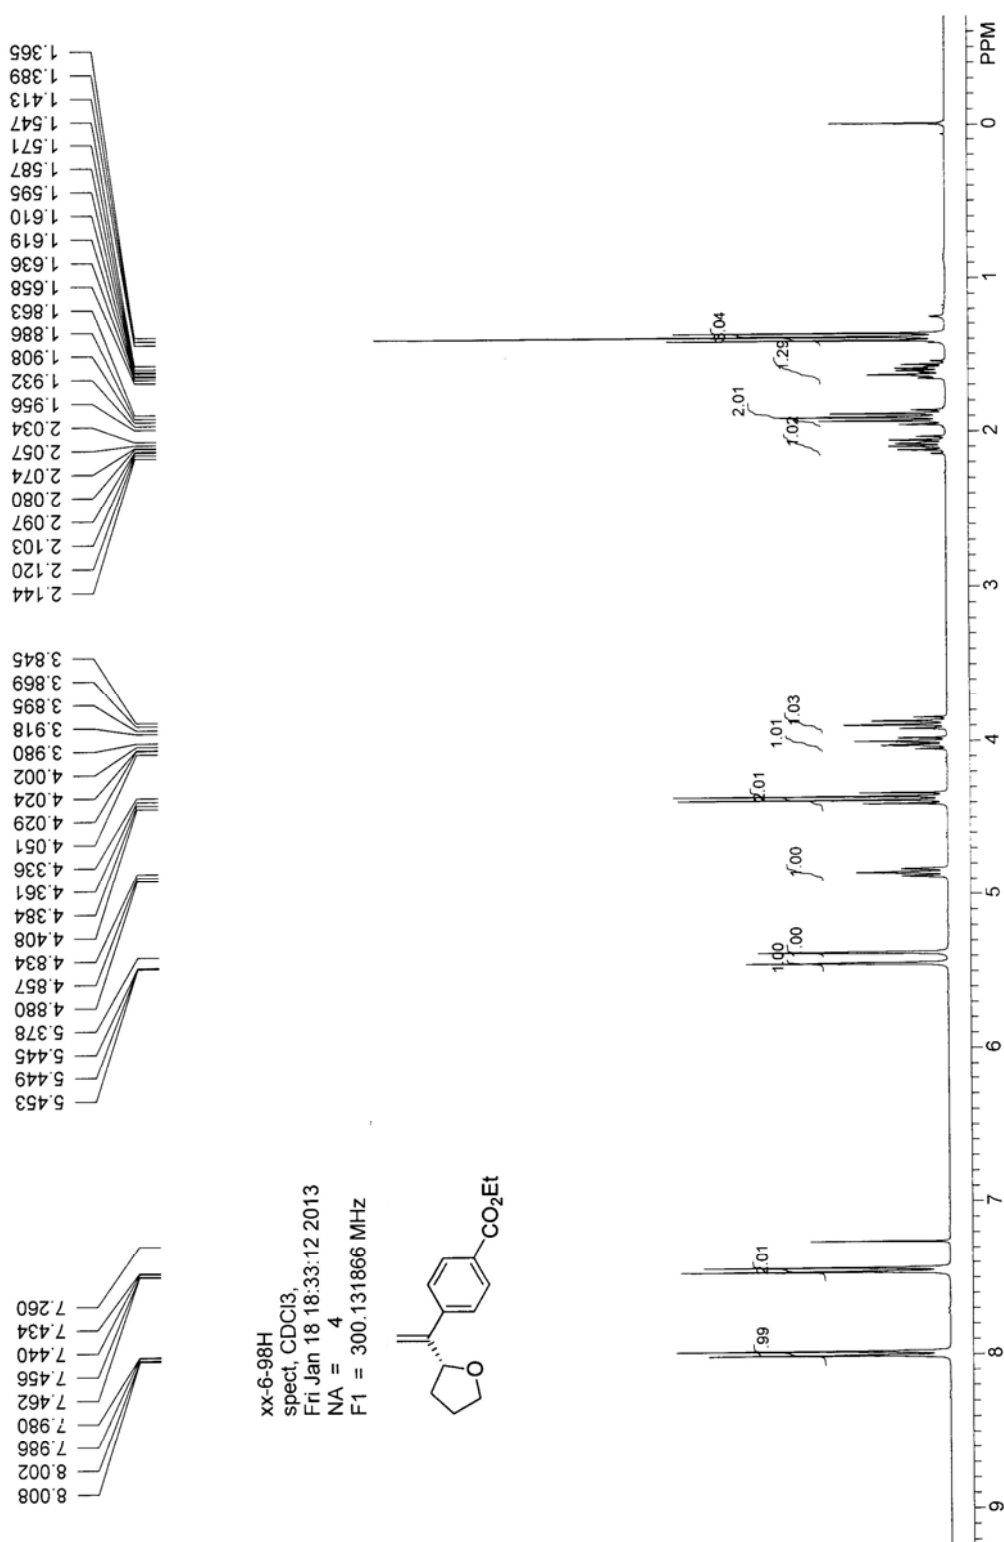



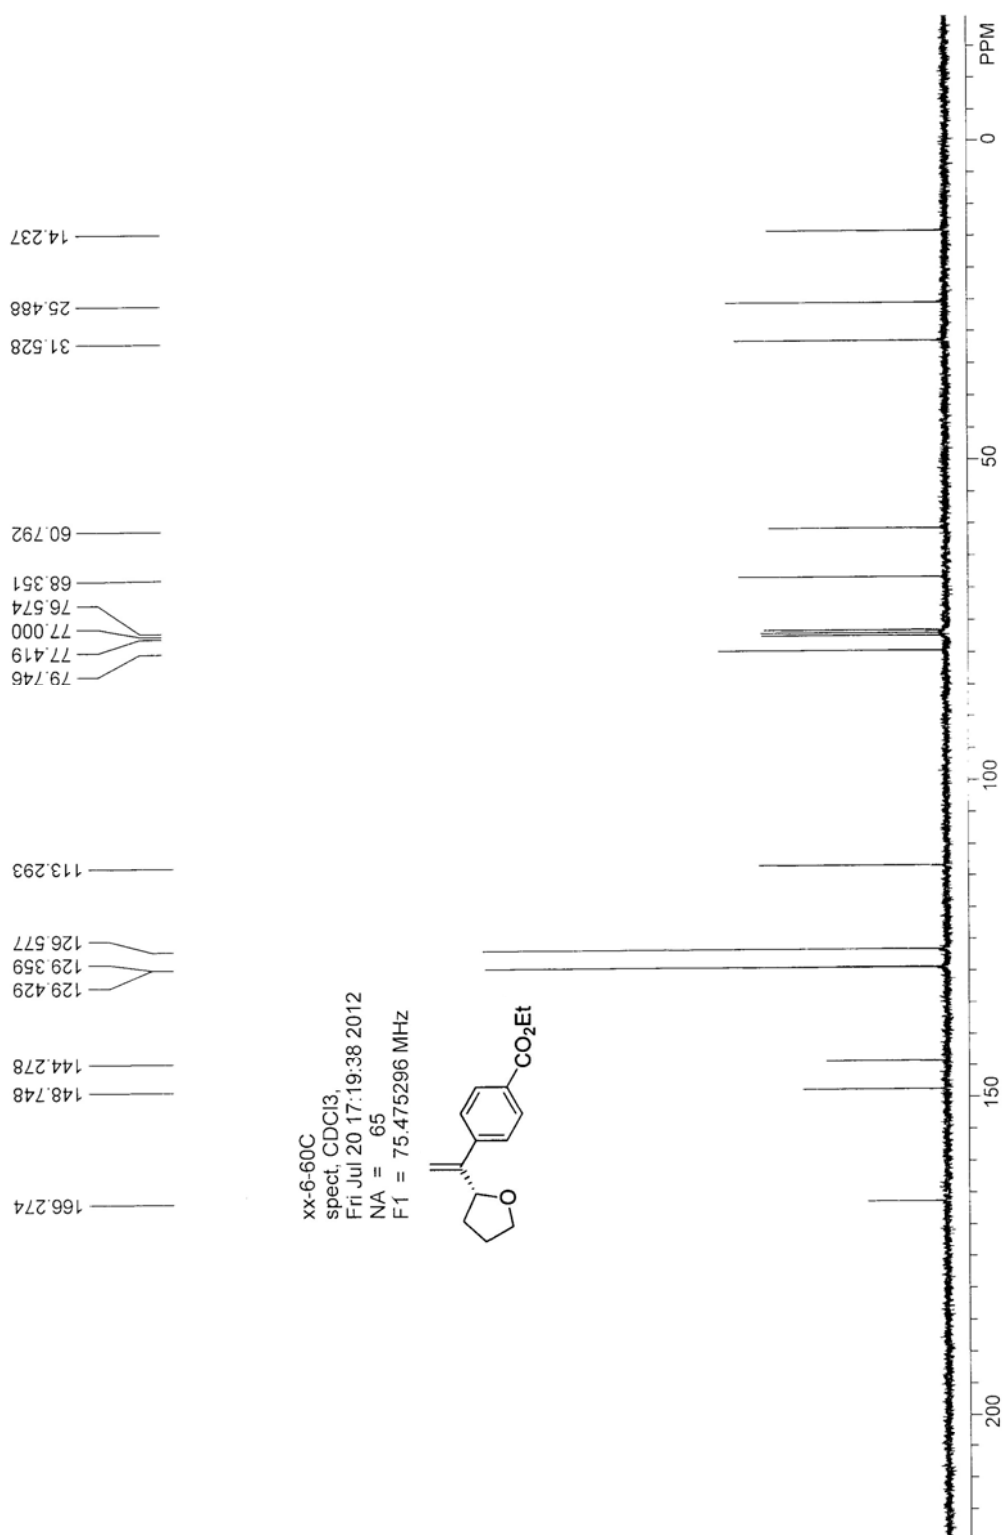

Operator:dell Timebase:U-3000 Sequence:xx

Page 1-1  
 2013-1-18 9:45 下午

|                    |                 |                   |          |
|--------------------|-----------------|-------------------|----------|
| <b>251 xx-6-98</b> |                 |                   |          |
| AS-H-98-2-0.5-230  |                 |                   |          |
| Sample Name:       | xx-6-98         | Injection Volume: | 20.0     |
| Vial Number:       | 385             | Channel:          | UV_VIS_1 |
| Sample Type:       | unknown         | Wavelength:       | 230      |
| Control Program:   | test            | Bandwidth:        | n.a.     |
| Quantif. Method:   | test            | Dilution Factor:  | 1.0000   |
| Recording Time:    | 2013-1-18 14:14 | Sample Weight:    | 1.0000   |
| Run Time (min):    | 21.25           | Sample Amount:    | 1.0000   |

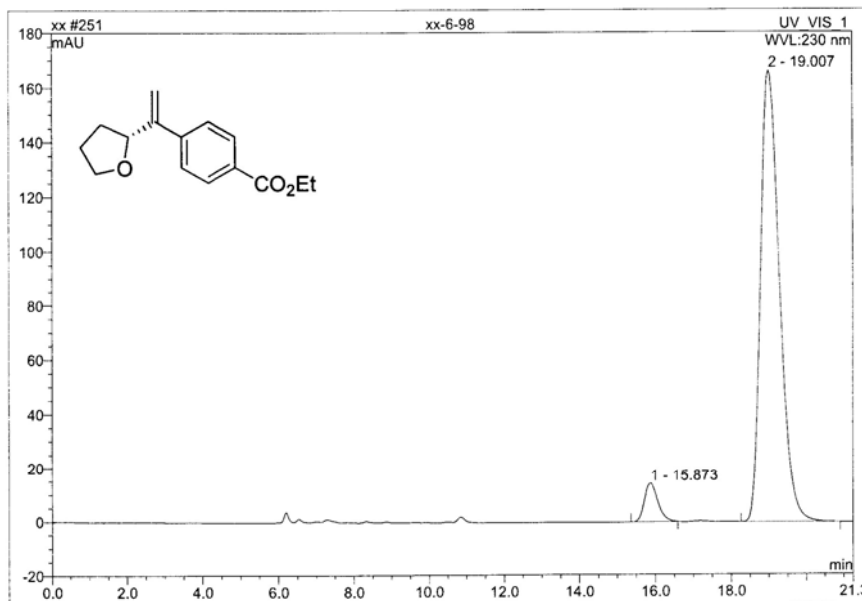

| No.           | Ret.Time<br>min | Peak Name | Height<br>mAU | Area<br>mAU*min | Rel.Area<br>% | Amount | Type |
|---------------|-----------------|-----------|---------------|-----------------|---------------|--------|------|
| 1             | 15.87           | n.a.      | 14.276        | 5.831           | 5.65          | n.a.   | BMB  |
| 2             | 19.01           | n.a.      | 166.523       | 97.442          | 94.35         | n.a.   | BMB  |
| <b>Total:</b> |                 |           | 180.799       | 103.273         | 100.00        | 0.000  |      |

default/Integration

Chromeleon (c) Dionex 1996-2006  
 Version 6.80 SR5 Build 2413 (137116)

Operator:dell Timebase:U-3000 Sequence:xx

Page 1-1  
 2013-1-18 9:45 下午

|                    |                 |                   |          |
|--------------------|-----------------|-------------------|----------|
| <b>252 xx-6-61</b> |                 | AS-H-98-2-0.5-230 |          |
| Sample Name:       | xx-6-61         | Injection Volume: | 20.0     |
| Vial Number:       | 386             | Channel:          | UV_VIS_1 |
| Sample Type:       | unknown         | Wavelength:       | 230      |
| Control Program:   | test            | Bandwidth:        | n.a.     |
| Quantif. Method:   | test            | Dilution Factor:  | 1.0000   |
| Recording Time:    | 2013-1-18 14:36 | Sample Weight:    | 1.0000   |
| Run Time (min):    | 21.21           | Sample Amount:    | 1.0000   |

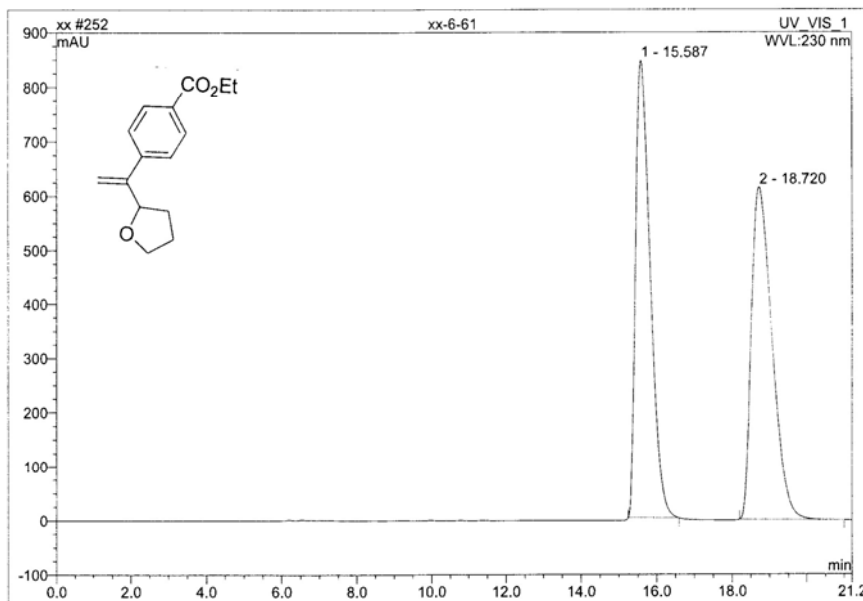

| No.           | Ret.Time<br>min | Peak Name | Height<br>mAU | Area<br>mAU*min | Rel.Area<br>% | Amount | Type |
|---------------|-----------------|-----------|---------------|-----------------|---------------|--------|------|
| 1             | 15.59           | n.a.      | 844.202       | 379.464         | 49.24         | n.a.   | BMB  |
| 2             | 18.72           | n.a.      | 614.462       | 391.202         | 50.76         | n.a.   | BMB  |
| <b>Total:</b> |                 |           | 1458.664      | 770.665         | 100.00        | 0.000  |      |

default/Integration

Chromeleon (c) Dionex 1996-2006  
 Version 6.80 SR5 Build 2413 (137116)

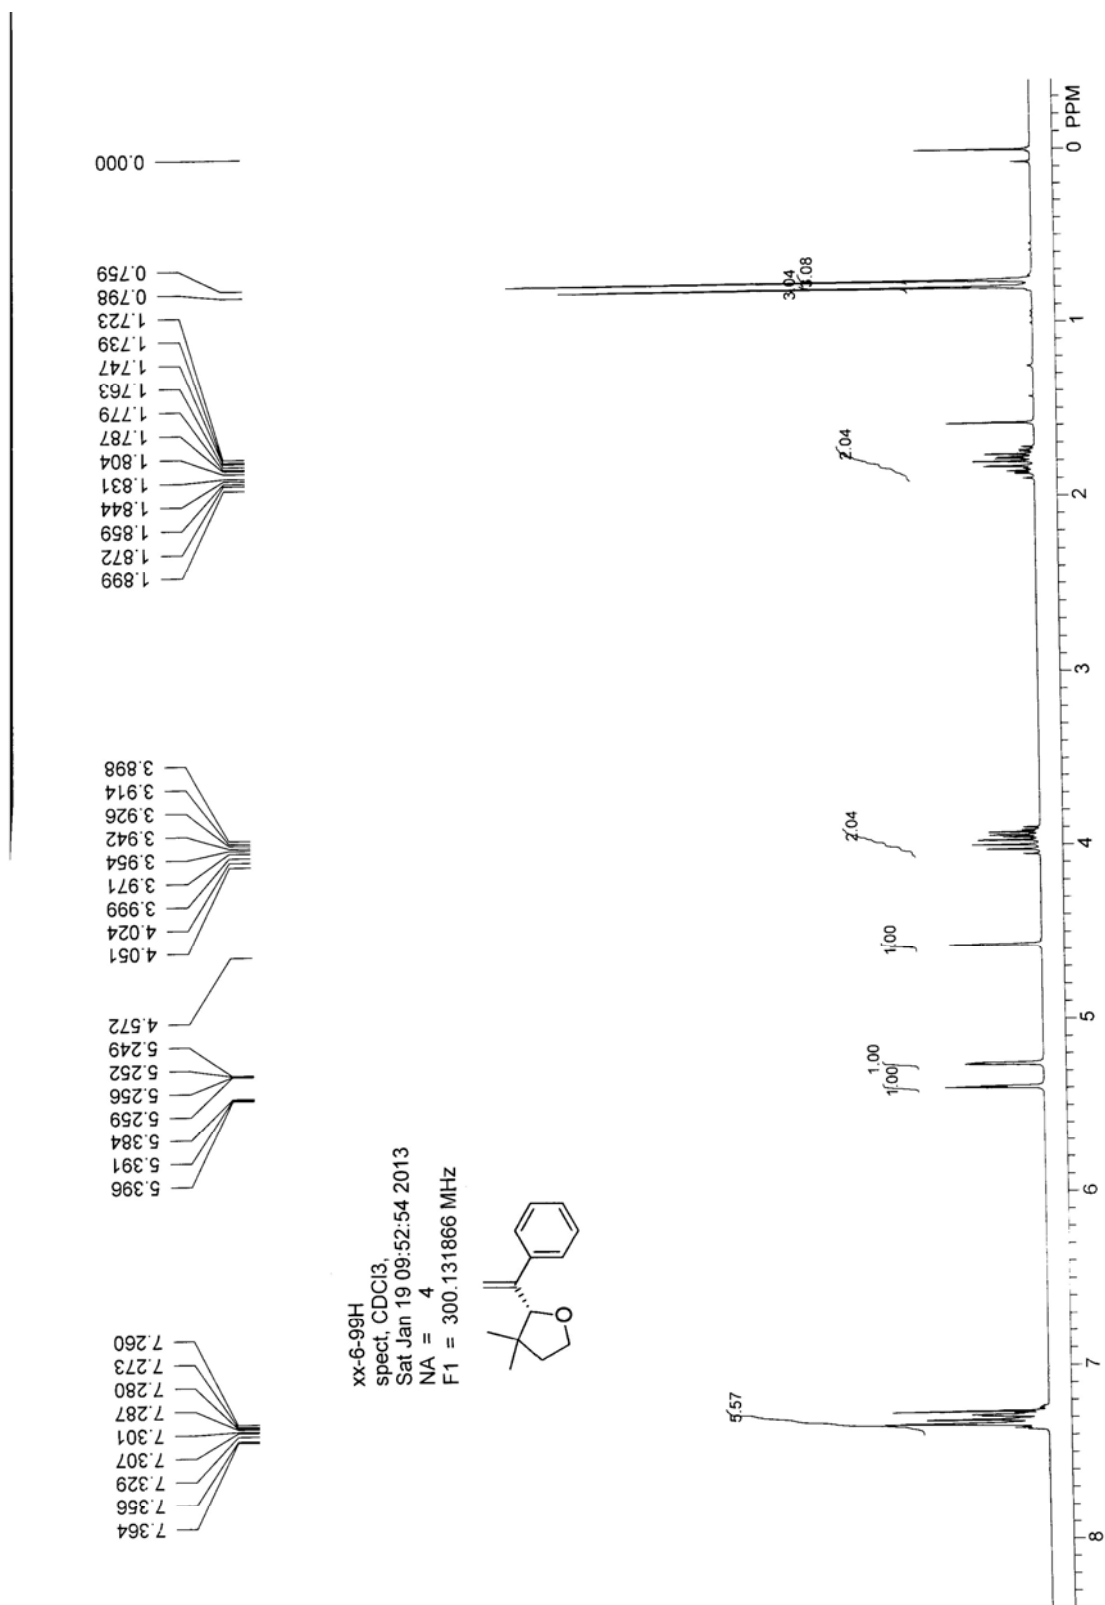

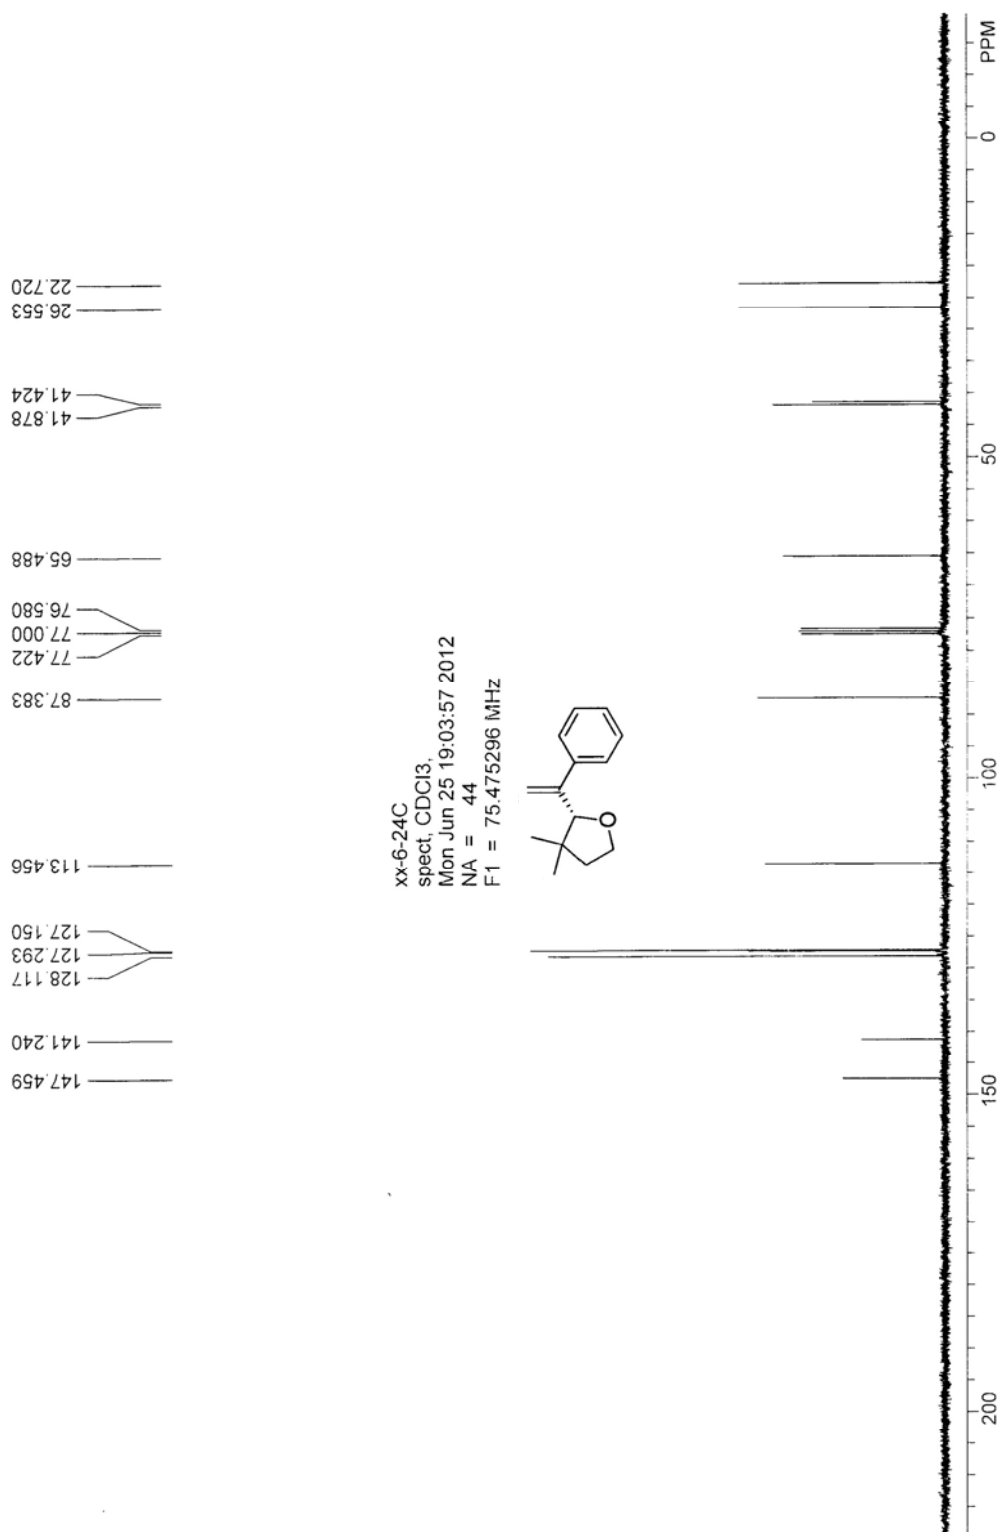

Operator:dell Timebase:U-3000 Sequence:xx

Page 1-1  
 2013-1-18 10:37 下午

|                                        |                                |
|----------------------------------------|--------------------------------|
| <b>253 xx-6-99</b>                     |                                |
| AD-H-95-5-0.5-230                      |                                |
| Sample Name: <b>xx-6-99</b>            | Injection Volume: <b>20.0</b>  |
| Vial Number: <b>387</b>                | Channel: <b>UV_VIS_1</b>       |
| Sample Type: <b>unknown</b>            | Wavelength: <b>230</b>         |
| Control Program: <b>test</b>           | Bandwidth: <b>n.a.</b>         |
| Quantif. Method: <b>test</b>           | Dilution Factor: <b>1.0000</b> |
| Recording Time: <b>2013-1-18 22:17</b> | Sample Weight: <b>1.0000</b>   |
| Run Time (min): <b>13.54</b>           | Sample Amount: <b>1.0000</b>   |

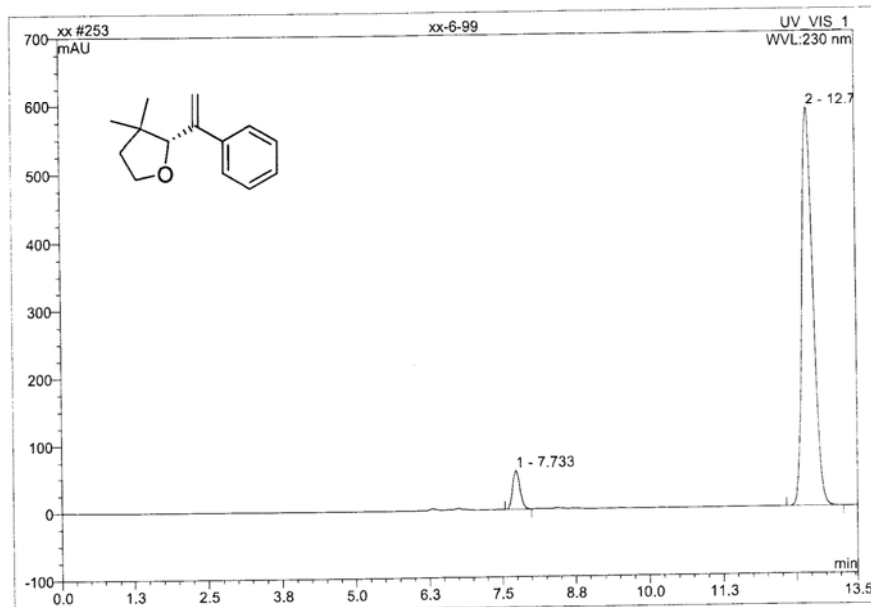

| No.           | Ret.Time min | Peak Name | Height mAU | Area mAU*min | Rel.Area % | Amount | Type |
|---------------|--------------|-----------|------------|--------------|------------|--------|------|
| 1             | 7.73         | n.a.      | 58.386     | 8.239        | 5.95       | n.a.   | BMB  |
| 2             | 12.71        | n.a.      | 587.951    | 130.235      | 94.05      | n.a.   | BMB  |
| <b>Total:</b> |              |           | 646.336    | 138.474      | 100.00     | 0.000  |      |

default/Integration

Chromeleon (c) Dionex 1996-2006  
 Version 6.80 SR5 Build 2413 (137116)

Operator:dell Timebase:U-3000 Sequence:xx

Page 1-1  
 2013-1-19 8:52 上午

|                     |                 |                   |          |
|---------------------|-----------------|-------------------|----------|
| <b>254 xx-5-186</b> |                 |                   |          |
| AD-H-95-5-0.5-230   |                 |                   |          |
| Sample Name:        | xx-5-186        | Injection Volume: | 20.0     |
| Vial Number:        | 388             | Channel:          | UV_VIS_1 |
| Sample Type:        | unknown         | Wavelength:       | 230      |
| Control Program:    | test            | Bandwidth:        | n.a.     |
| Quantif. Method:    | test            | Dilution Factor:  | 1.0000   |
| Recording Time:     | 2013-1-18 22:30 | Sample Weight:    | 1.0000   |
| Run Time (min):     | 25.27           | Sample Amount:    | 1.0000   |

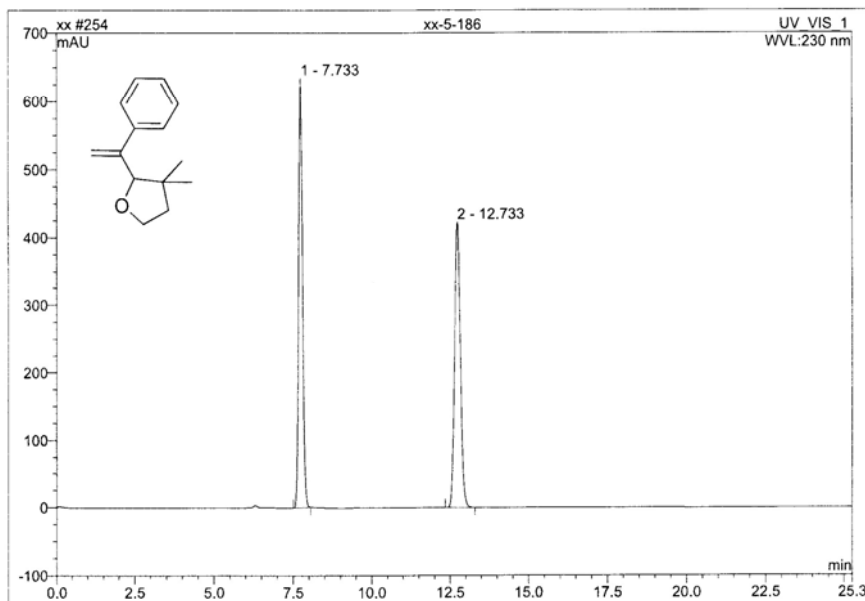

| No.           | Ret.Time<br>min | Peak Name | Height<br>mAU | Area<br>mAU*min | Rel.Area<br>% | Amount | Type |
|---------------|-----------------|-----------|---------------|-----------------|---------------|--------|------|
| 1             | 7.73            | n.a.      | 634.642       | 91.349          | 49.45         | n.a.   | BMB  |
| 2             | 12.73           | n.a.      | 423.268       | 93.378          | 50.55         | n.a.   | BMB  |
| <b>Total:</b> |                 |           | 1057.910      | 184.727         | 100.00        | 0.000  |      |

default/Integration

Chromeleon (c) Dionex 1996-2006  
 Version 6.80 SR5 Build 2413 (137116)

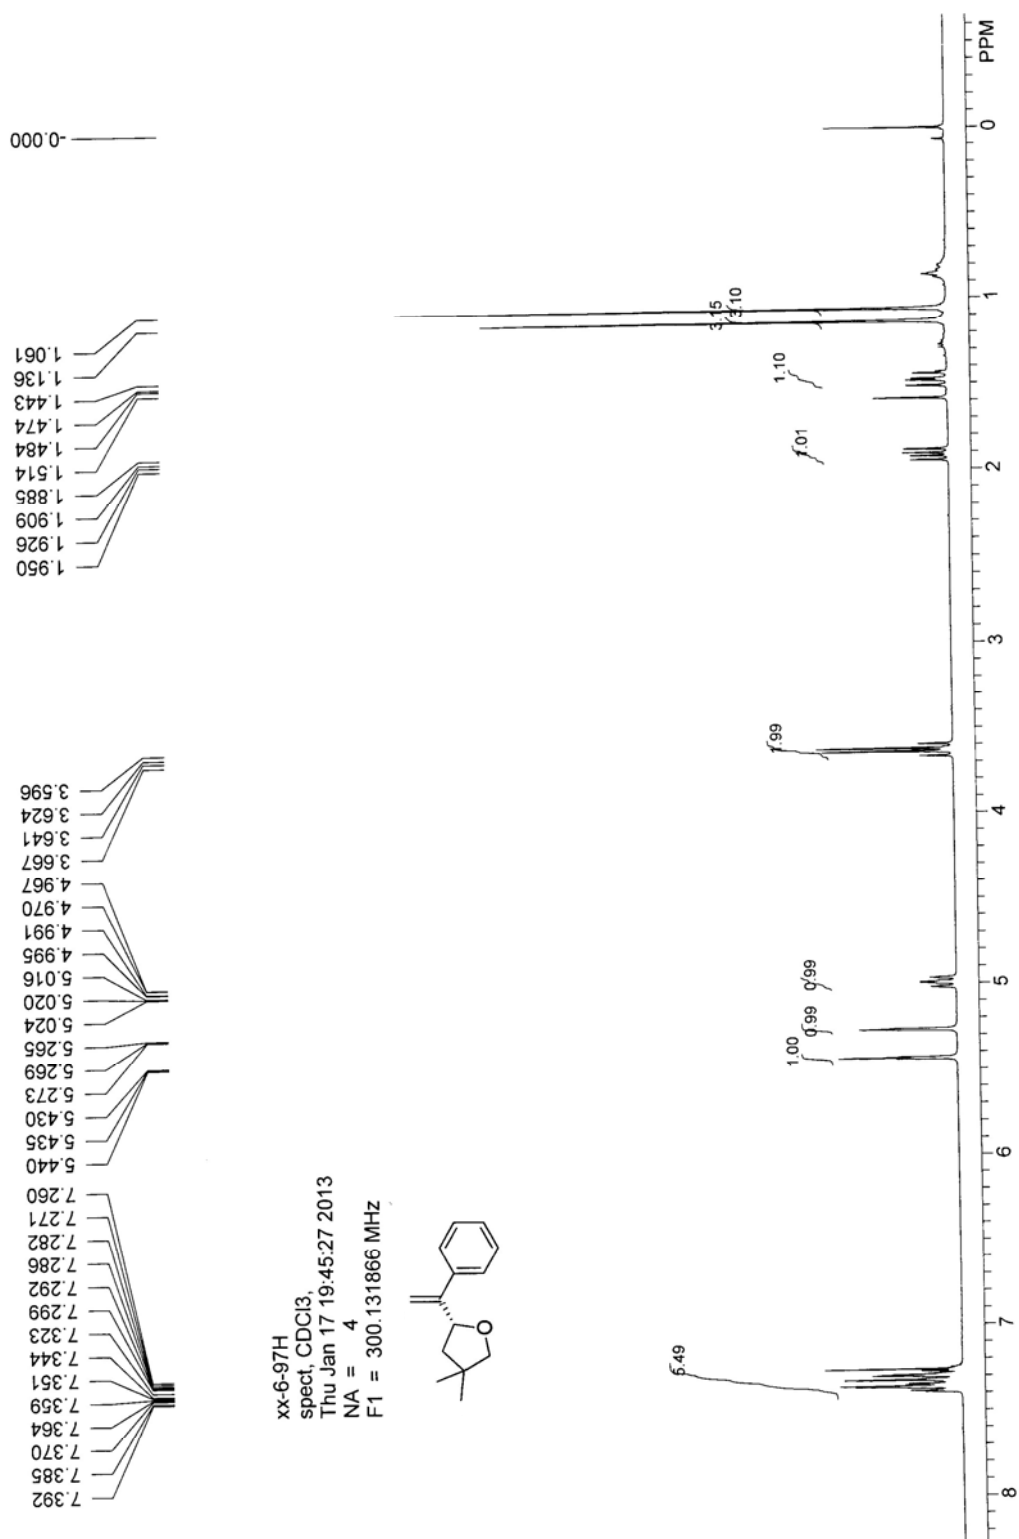



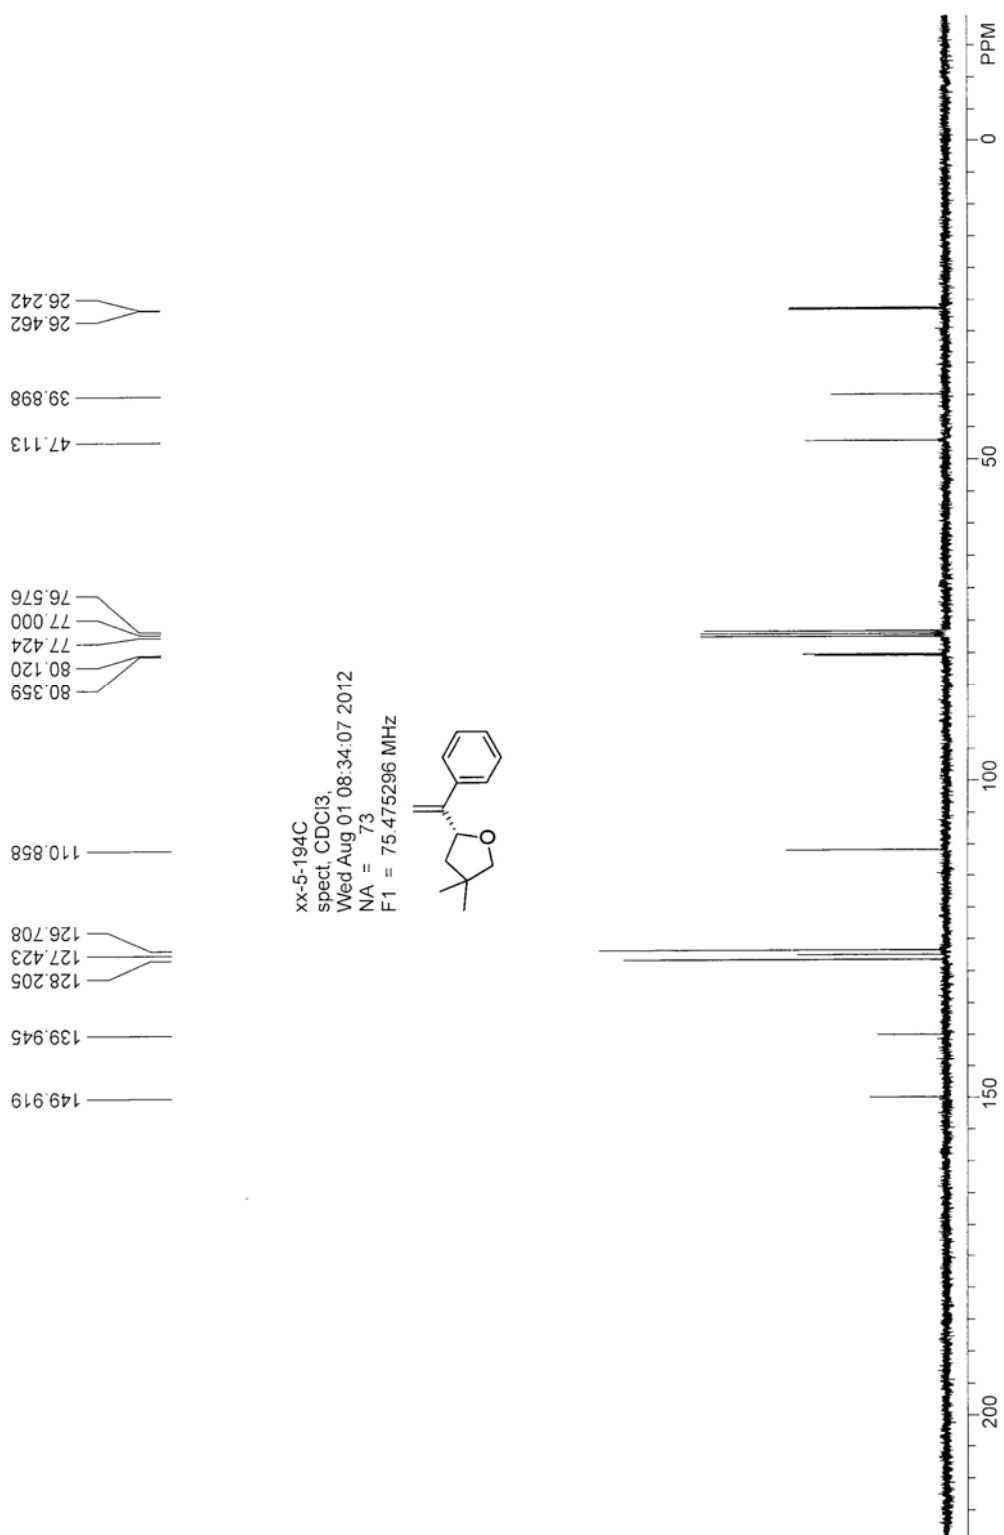

Operator:dell Timebase:U-3000 Sequence:xx

Page 1-1  
 2013-1-16 3:41 下午

|                    |                 |                   |          |
|--------------------|-----------------|-------------------|----------|
| <b>244 xx-6-97</b> |                 |                   |          |
| AD-H-95-5-0.5-230  |                 |                   |          |
| Sample Name:       | xx-6-97         | Injection Volume: | 20.0     |
| Vial Number:       | 378             | Channel:          | UV_VIS_1 |
| Sample Type:       | unknown         | Wavelength:       | 230      |
| Control Program:   | test            | Bandwidth:        | n.a.     |
| Quantif. Method:   | test            | Dilution Factor:  | 1.0000   |
| Recording Time:    | 2013-1-16 15:27 | Sample Weight:    | 1.0000   |
| Run Time (min):    | 10.69           | Sample Amount:    | 1.0000   |

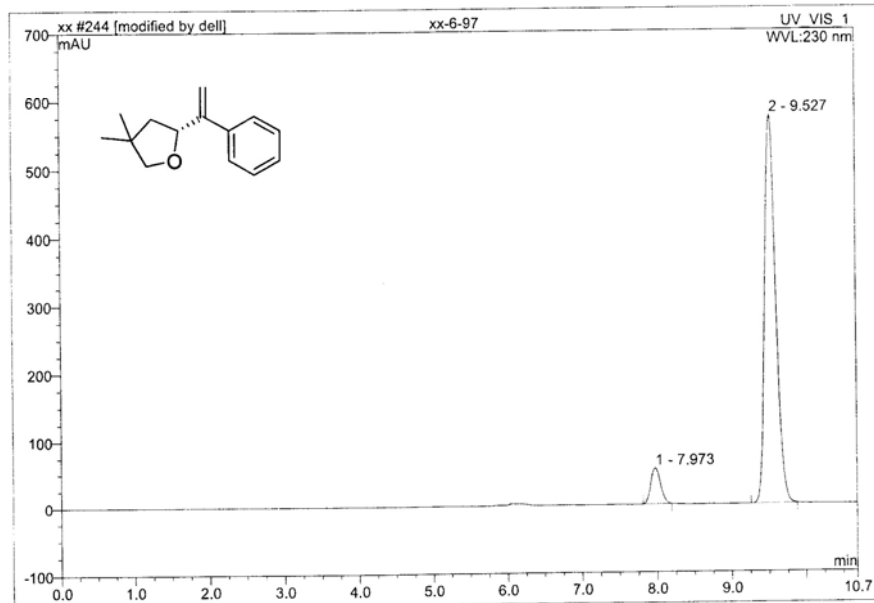

| No.           | Ret.Time<br>min | Peak Name | Height<br>mAU | Area<br>mAU*min | Rel.Area<br>% | Amount | Type |
|---------------|-----------------|-----------|---------------|-----------------|---------------|--------|------|
| 1             | 7.97            | n.a.      | 54.792        | 8.028           | 7.51          | n.a.   | BMB* |
| 2             | 9.53            | n.a.      | 572.657       | 98.793          | 92.49         | n.a.   | BMB* |
| <b>Total:</b> |                 |           | 627.449       | 106.821         | 100.00        | 0.000  |      |

default/Integration

Chromeleon (c) Dionex 1996-2006  
 Version 6.80 SR5 Build 2413 (137116)

Operator:dell Timebase:U-3000 Sequence:xx

Page 1-1  
 2013-1-18 9:36 下午

|                     |                 |
|---------------------|-----------------|
| <b>245 xx-5-187</b> |                 |
| AD-H-95-5-0.5-230   |                 |
| Sample Name:        | xx-5-187        |
| Vial Number:        | 379             |
| Sample Type:        | unknown         |
| Control Program:    | test            |
| Quantif. Method:    | test            |
| Recording Time:     | 2013-1-16 15:39 |
| Run Time (min):     | 10.12           |
| Injection Volume:   | 20.0            |
| Channel:            | UV_VIS_1        |
| Wavelength:         | 230             |
| Bandwidth:          | n.a.            |
| Dilution Factor:    | 1.0000          |
| Sample Weight:      | 1.0000          |
| Sample Amount:      | 1.0000          |

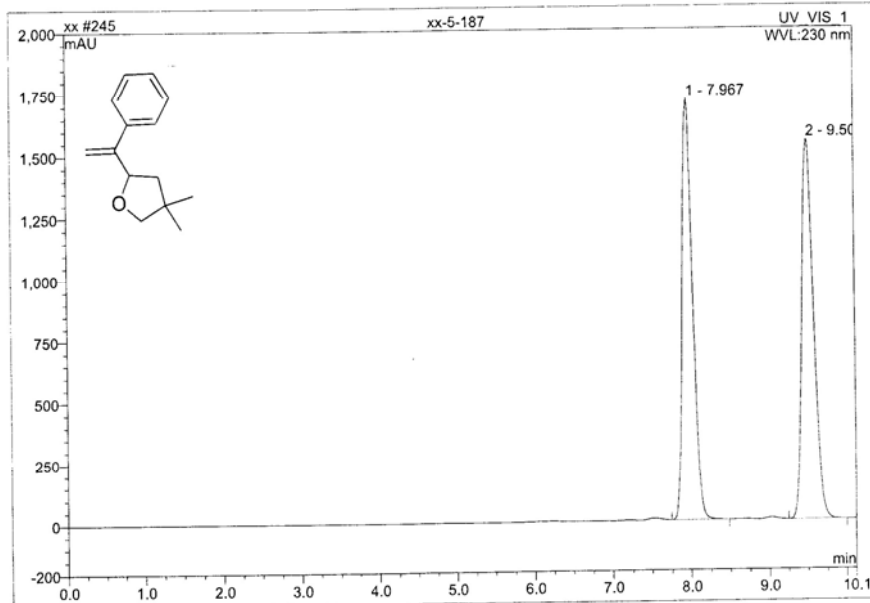

| No.           | Ret.Time min | Peak Name | Height mAU | Area mAU*min | Rel.Area % | Amount | Type |
|---------------|--------------|-----------|------------|--------------|------------|--------|------|
| 1             | 7.97         | n.a.      | 1713.890   | 267.882      | 49.50      | n.a.   | BMB  |
| 2             | 9.51         | n.a.      | 1544.236   | 273.298      | 50.50      | n.a.   | BMB  |
| <b>Total:</b> |              |           | 3258.126   | 541.180      | 100.00     | 0.000  |      |

default/Integration

Chromeleon (c) Dionex 1996-2006  
 Version 6.80 SR5 Build 2413 (137116)

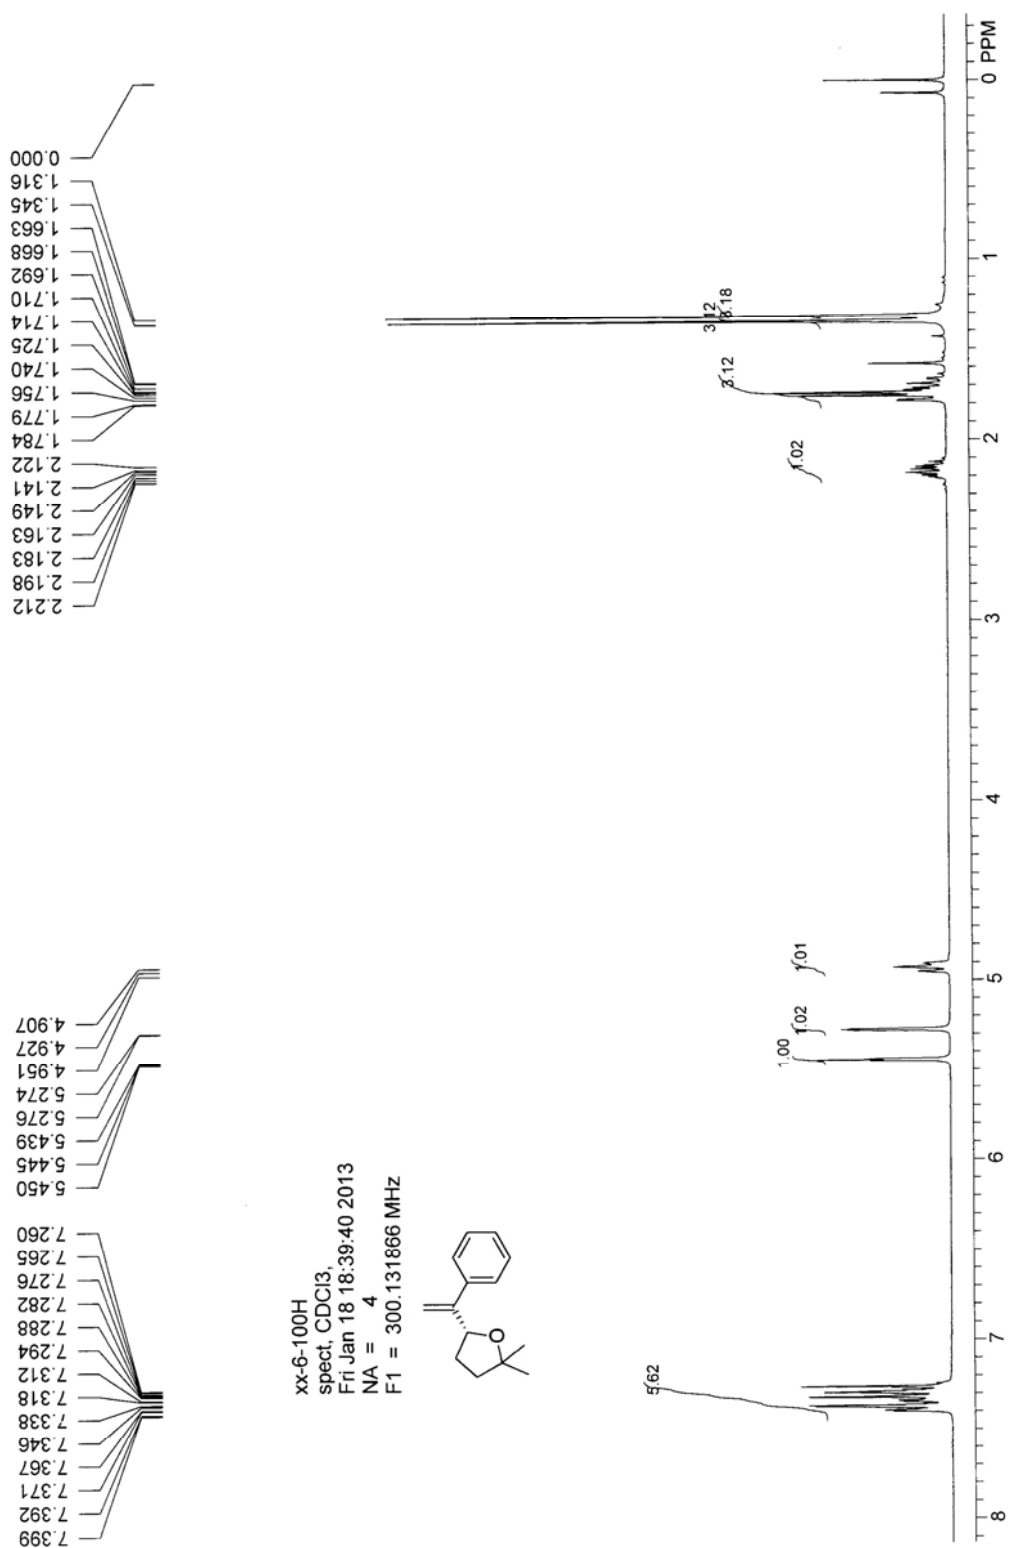

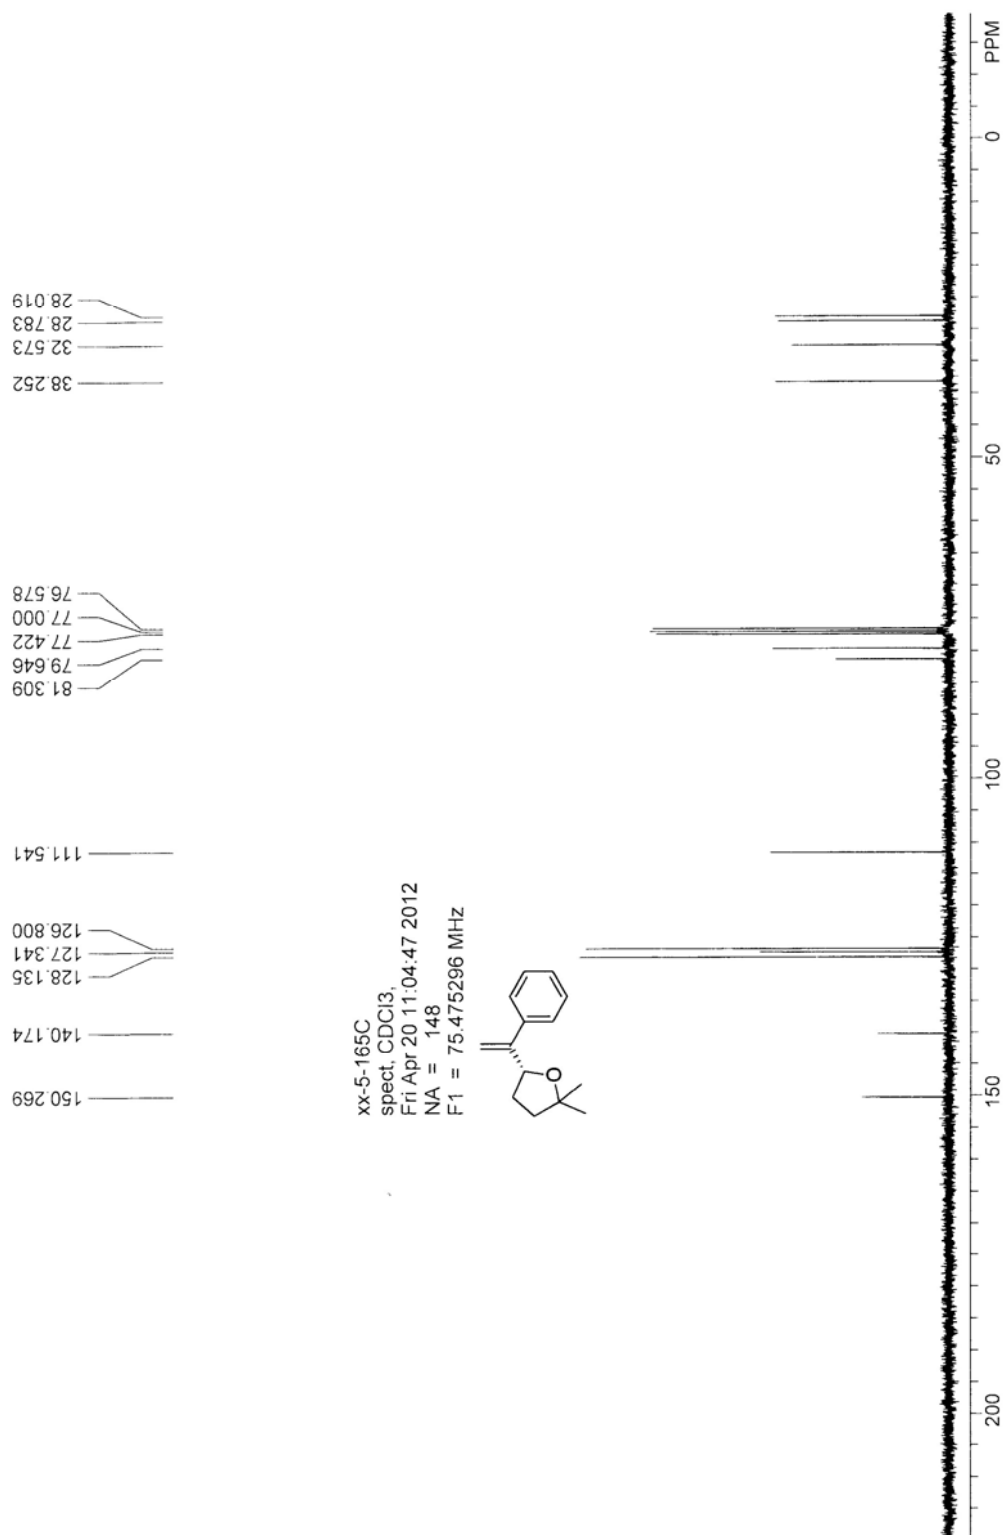

Operator:dell Timebase:U-3000 Sequence:xx

Page 1-1  
 2013-1-17 11:37 下午

|                     |                 |                   |          |
|---------------------|-----------------|-------------------|----------|
| <b>246 xx-6-100</b> |                 |                   |          |
| AD-H-95-5-0.5-230   |                 |                   |          |
| Sample Name:        | xx-6-100        | Injection Volume: | 20.0     |
| Vial Number:        | 380             | Channel:          | UV_VIS_1 |
| Sample Type:        | unknown         | Wavelength:       | 230      |
| Control Program:    | test            | Bandwidth:        | n.a.     |
| Quantif. Method:    | test            | Dilution Factor:  | 1.0000   |
| Recording Time:     | 2013-1-17 23:22 | Sample Weight:    | 1.0000   |
| Run Time (min):     | 10.65           | Sample Amount:    | 1.0000   |

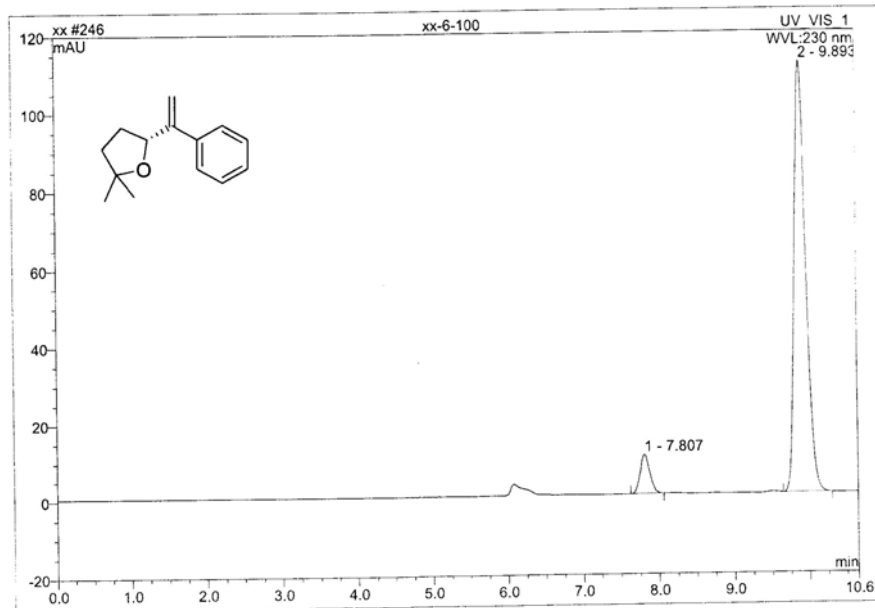

| No.           | Ret.Time<br>min | Peak Name | Height<br>mAU | Area<br>mAU*min | Rel.Area<br>% | Amount | Type |
|---------------|-----------------|-----------|---------------|-----------------|---------------|--------|------|
| 1             | 7.81            | n.a.      | 10.342        | 1.506           | 7.04          | n.a.   | BMB  |
| 2             | 9.89            | n.a.      | 111.361       | 19.884          | 92.96         | n.a.   | BMB  |
| <b>Total:</b> |                 |           | 121.703       | 21.391          | 100.00        | 0.000  |      |

default/Integration

Chromeleon (c) Dionex 1996-2006  
 Version 6.80 SR5 Build 2413 (137116)

Operator:dell Timebase:U-3000 Sequence:xx

Page 1-1  
 2013-1-18 9:37 下午

|                     |                 |                   |          |
|---------------------|-----------------|-------------------|----------|
| <b>247 xx-5-166</b> |                 | AD-H-95-5-0.5-230 |          |
| Sample Name:        | xx-5-166        | Injection Volume: | 20.0     |
| Vial Number:        | 381             | Channel:          | UV_VIS_1 |
| Sample Type:        | unknown         | Wavelength:       | 230      |
| Control Program:    | test            | Bandwidth:        | n.a.     |
| Quantif. Method:    | test            | Dilution Factor:  | 1.0000   |
| Recording Time:     | 2013-1-17 23:34 | Sample Weight:    | 1.0000   |
| Run Time (min):     | 24.44           | Sample Amount:    | 1.0000   |

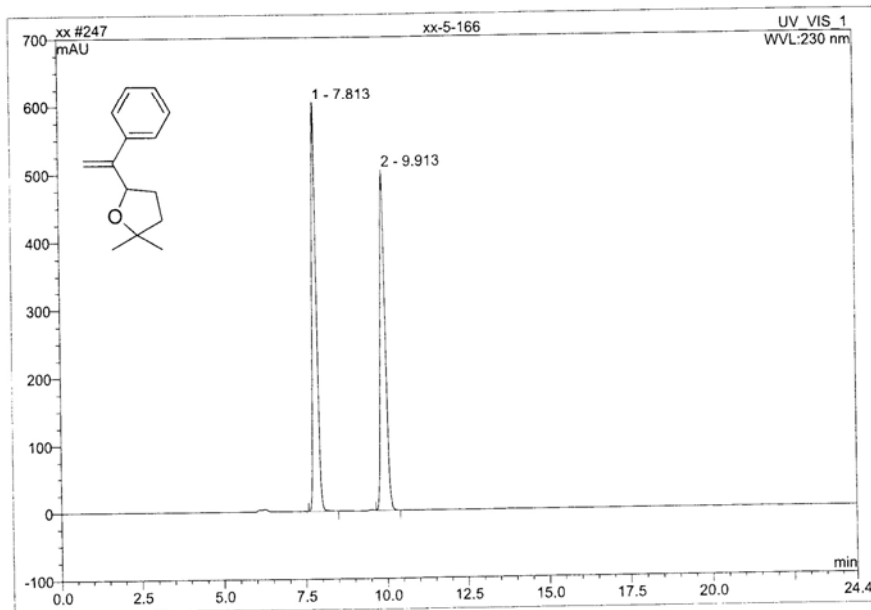

| No.           | Ret.Time min | Peak Name | Height mAU | Area mAU*min | Rel.Area % | Amount | Type |
|---------------|--------------|-----------|------------|--------------|------------|--------|------|
| 1             | 7.81         | n.a.      | 603.933    | 90.184       | 49.96      | n.a.   | BMB  |
| 2             | 9.91         | n.a.      | 503.330    | 90.316       | 50.04      | n.a.   | BMB  |
| <b>Total:</b> |              |           | 1107.263   | 180.499      | 100.00     | 0.000  |      |

default/Integration

Chromeleon (c) Dionex 1996-2006  
 Version 6.80 SR5 Build 2413 (137116)

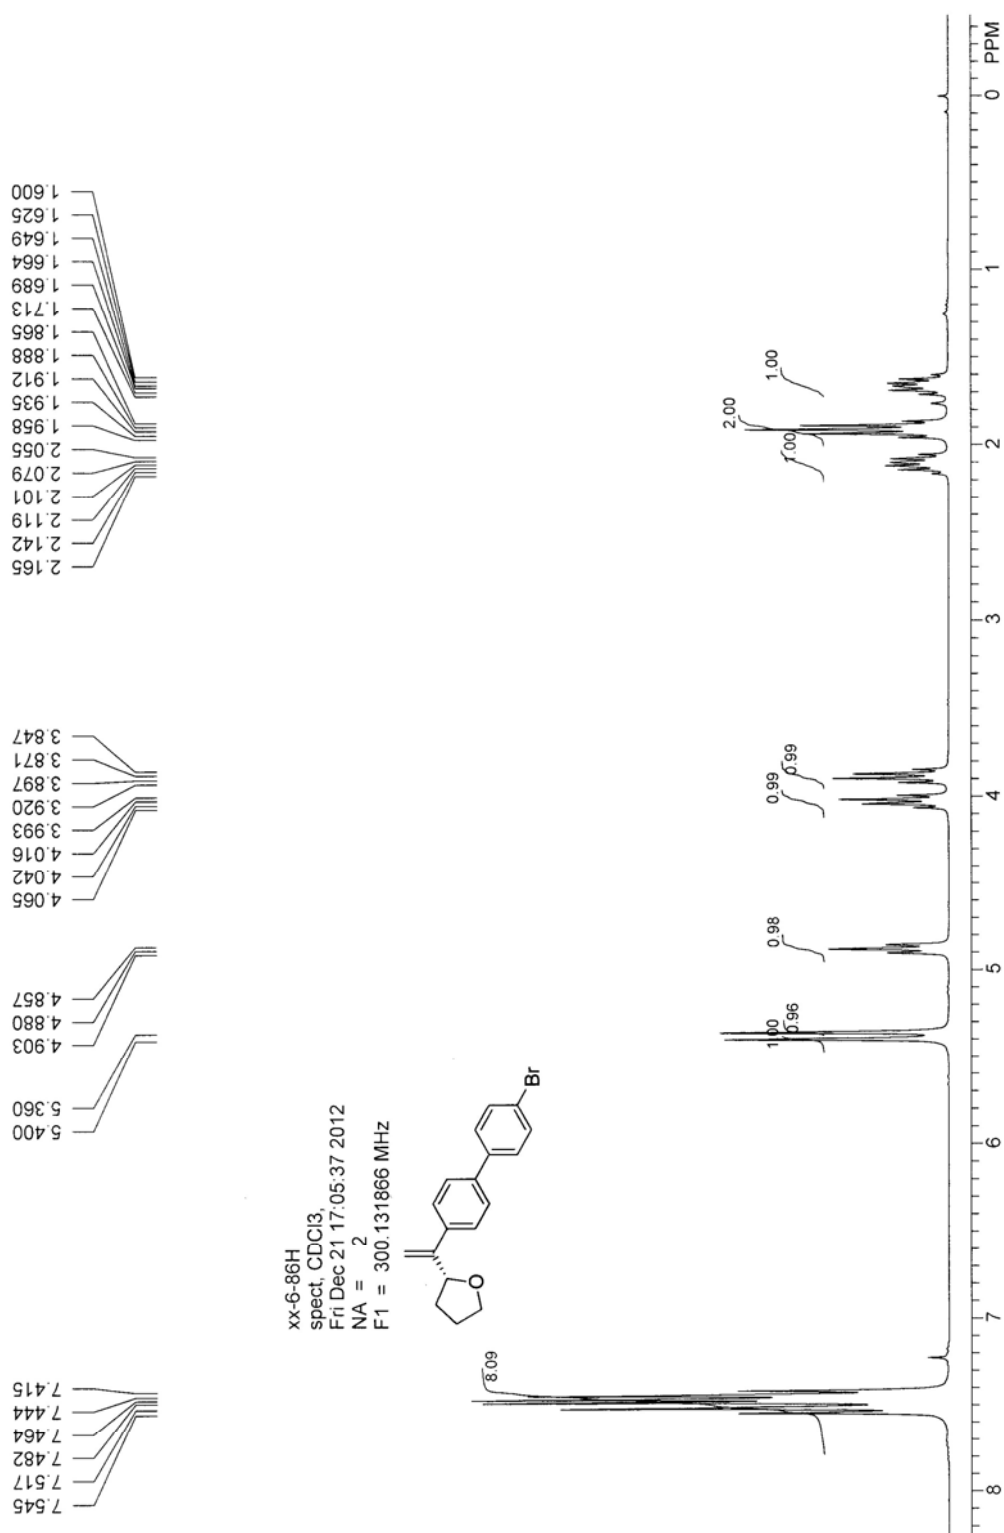



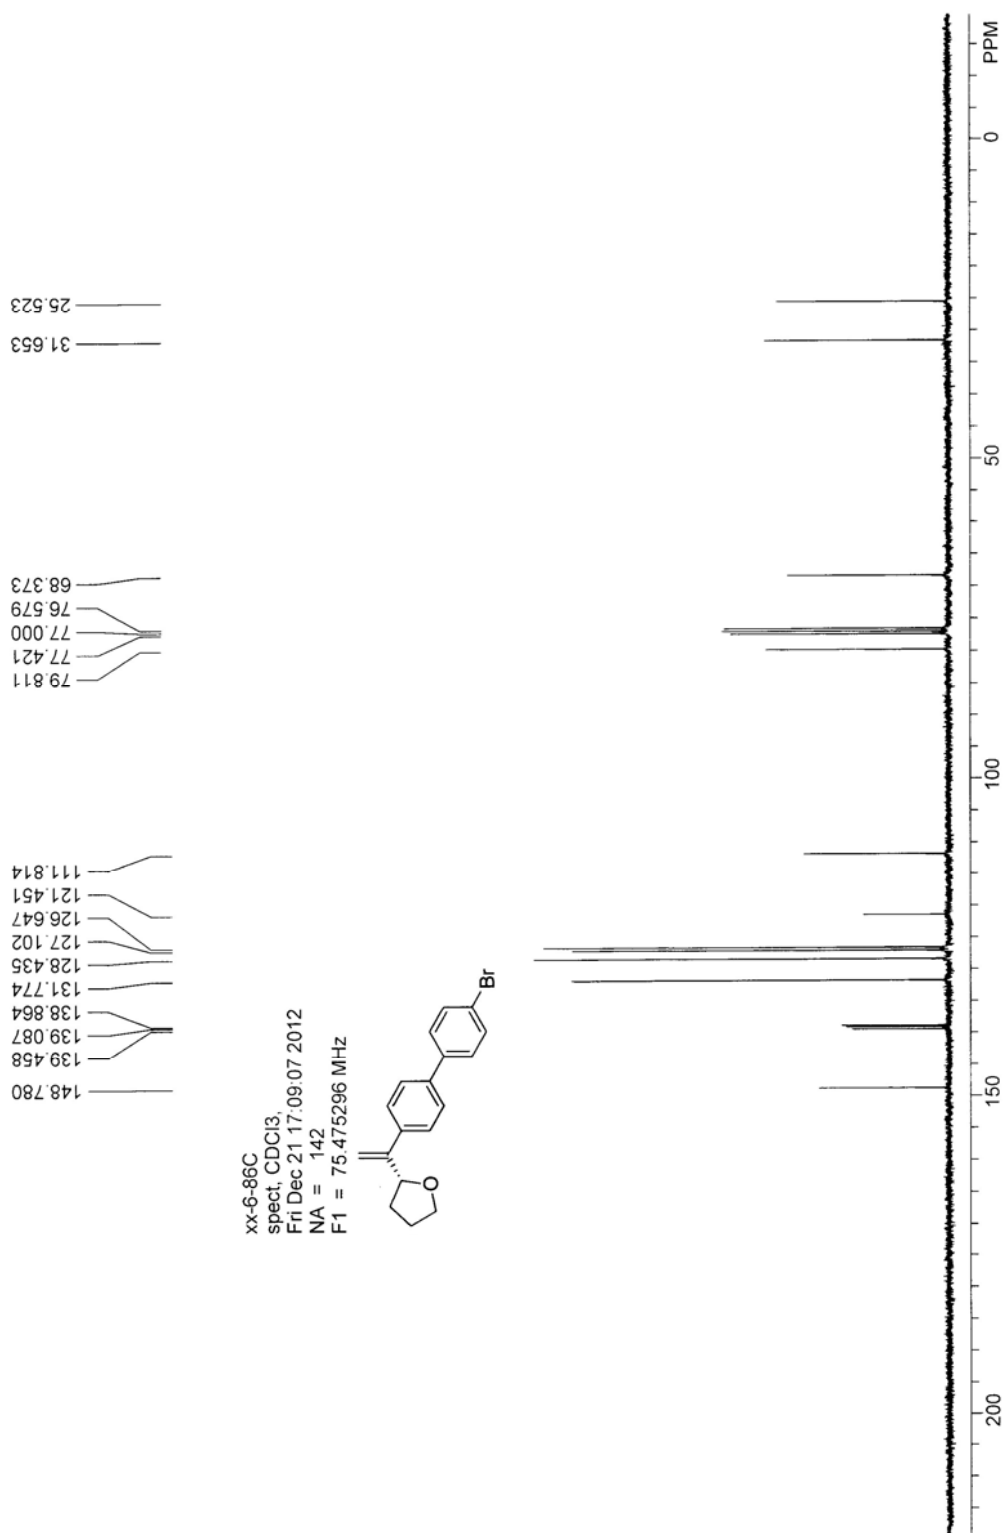

Operator:dell Timebase:U-3000 Sequence:xx

Page 1-1  
 2012-12-20 9:25 下午

|                    |                  |                         |
|--------------------|------------------|-------------------------|
| <b>219 xx-6-86</b> |                  |                         |
| IC -95-5-0.5-214   |                  |                         |
| Sample Name:       | xx-6-86          | Injection Volume: 20.0  |
| Vial Number:       | 353              | Channel: UV_VIS_1       |
| Sample Type:       | unknown          | Wavelength: 214         |
| Control Program:   | test             | Bandwidth: n.a.         |
| Quantif. Method:   | test             | Dilution Factor: 1.0000 |
| Recording Time:    | 2012-12-20 21:05 | Sample Weight: 1.0000   |
| Run Time (min):    | 16.09            | Sample Amount: 1.0000   |

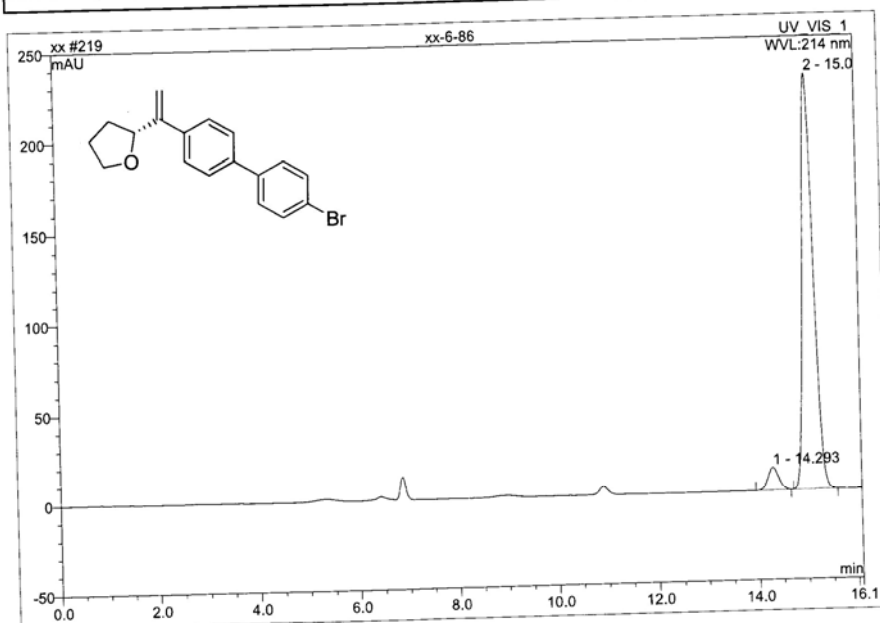

| No.           | Ret. Time<br>min | Peak Name | Height<br>mAU | Area<br>mAU*min | Rel. Area<br>% | Amount | Type |
|---------------|------------------|-----------|---------------|-----------------|----------------|--------|------|
| 1             | 14.29            | n.a.      | 12.794        | 3.211           | 5.05           | n.a.   | BMB  |
| 2             | 15.07            | n.a.      | 229.344       | 60.313          | 94.95          | n.a.   | BMB  |
| <b>Total:</b> |                  |           | 242.138       | 63.524          | 100.00         | 0.000  |      |

default/Integration

Chromeleon (c) Dionex 1996-2006  
 Version 6.80 SR5 Build 2413 (137116)

Operator:dell Timebase:U-3000 Sequence:xx

Page 1-1  
 2012-12-20 9:40 下午

| <b>220 xx-6-78</b> |                  |                   |          |
|--------------------|------------------|-------------------|----------|
| IC -95-5-0.5-214   |                  |                   |          |
| Sample Name:       | xx-6-78          | Injection Volume: | 20.0     |
| Vial Number:       | 354              | Channel:          | UV_VIS_1 |
| Sample Type:       | unknown          | Wavelength:       | 214      |
| Control Program:   | test             | Bandwidth:        | n.a.     |
| Quantif. Method:   | test             | Dilution Factor:  | 1.0000   |
| Recording Time:    | 2012-12-20 21:23 | Sample Weight:    | 1.0000   |
| Run Time (min):    | 16.07            | Sample Amount:    | 1.0000   |

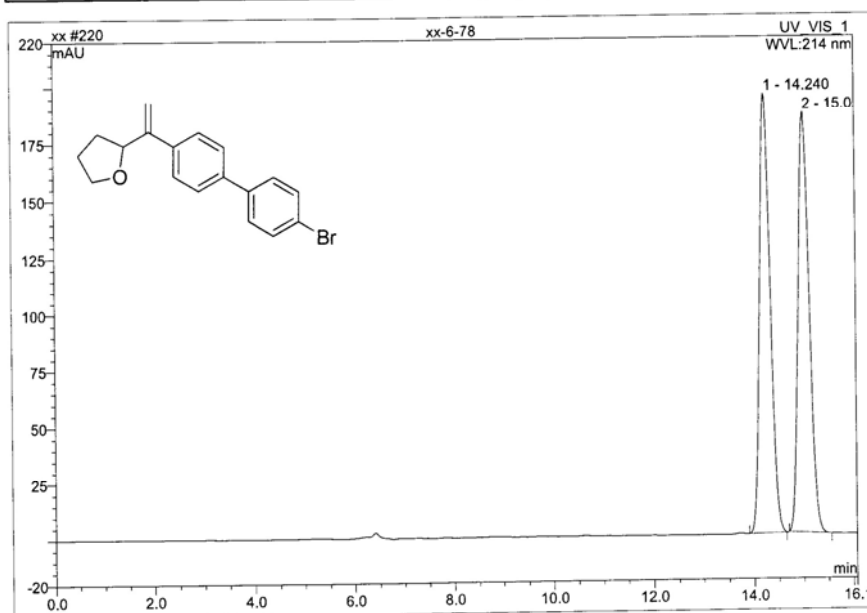

| No.           | Ret.Time<br>min | Peak Name | Height<br>mAU | Area<br>mAU*min | Rel.Area<br>% | Amount | Type |
|---------------|-----------------|-----------|---------------|-----------------|---------------|--------|------|
| 1             | 14.24           | n.a.      | 194.525       | 48.005          | 49.81         | n.a.   | BMB  |
| 2             | 15.02           | n.a.      | 185.926       | 48.373          | 50.19         | n.a.   | BMB  |
| <b>Total:</b> |                 |           | 380.451       | 96.378          | 100.00        | 0.000  |      |

default/Integration

Chromeleon (c) Dionex 1996-2006  
 Version 6.80 SR5 Build 2413 (137116)
